# Supplementary material for: Autoantibodies in Serum of Systemic Scleroderma Patients: Peptide-Based Epitope Mapping Indicates Increased Binding to Cytoplasmic Domains of CXCR3
Source: Front Immunol. 2018 Mar 22;9:428. doi: 10.3389/fimmu.2018.00428 (PMC5874968; doi:10.3389/fimmu.2018.00428)
Supplement: Supplementary file 2 [file data_sheet_2.xlsx]

## Sheet: Table 1
Plate.ID	Well	ABS.450nm	Normalized.ABS	Logit.ABS	Serum.ID	Group	Peptide	Start	End	Coating	Hydrophobicity	pI	Charge	Extracellular	Transmembrane	Cytoplasmic	Rhodopsin	Antigenic.predicted.epitope	ABCpred.predicted.epitope	Experiment.Day
1	A01	0.225	0.15837	-0.648237	110_SSC	Patient	7	61	80	Peptid 7 - alternative	2.035	6.1	-0.0908091	0	1	0	0.95	0.95	0.95	Day A
1	A02	0.233	0.17013	-0.639144	110_SSC	Patient	7	61	80	Peptid 7 - standard	2.035	6.1	-0.0908091	0	1	0	0.95	0.95	0.95	Day A
1	A03	0.237	0.176011	-0.634665	110_SSC	Patient	13	121	140	Peptid 13 - standard	1.06	8.523	0.858299	0.25	0.75	0	0.5	0.75	0.75	Day A
1	A04	0.233	0.17013	-0.639144	110_SSC	Patient	19	181	200	Peptid 19 - standard	0.31	5.361	-1.7534	0.55	0.45	0	0.4	0.7	0.7	Day A
1	A05	0.553	0.640561	-0.308155	110_SSC	Patient	25	241	260	Peptid 25 - standard	0.845	13.102	4.90911	0	0.25	0.75	0.4	0.7	0.7	Day A
1	A06	0.242	0.183361	-0.629121	110_SSC	Patient	31	301	320	Peptid 31 - standard	0.845	7.249	-0.0230898	0	1	0	1	0.95	0.95	Day A
1	A07	0.129	0.0172402	-0.802391	96_SSC	Patient	7	61	80	Peptid 7 - alternative	2.035	6.1	-0.0908091	0	1	0	0.95	0.95	0.95	Day A
1	A08	0.197	0.117207	-0.681915	96_SSC	Patient	7	61	80	Peptid 7 - standard	2.035	6.1	-0.0908091	0	1	0	0.95	0.95	0.95	Day A
1	A09	0.162	0.0657534	-0.731316	96_SSC	Patient	13	121	140	Peptid 13 - standard	1.06	8.523	0.858299	0.25	0.75	0	0.5	0.75	0.75	Day A
1	A10	0.192	0.109856	-0.688336	96_SSC	Patient	19	181	200	Peptid 19 - standard	0.31	5.361	-1.7534	0.55	0.45	0	0.4	0.7	0.7	Day A
1	A11	0.575	0.672903	-0.283746	96_SSC	Patient	25	241	260	Peptid 25 - standard	0.845	13.102	4.90911	0	0.25	0.75	0.4	0.7	0.7	Day A
1	A12	0.189	0.105446	-0.692266	96_SSC	Patient	31	301	320	Peptid 31 - standard	0.845	7.249	-0.0230898	0	1	0	1	0.95	0.95	Day A
1	B01	0.668	0.809622	-0.174364	110_SSC	Patient	NA	NA	NA	Positive Control	NA	6.1	-0.0908091	NA	NA	NA	NA	NA	NA	Day A
1	B02	0.262	0.212763	-0.60747	110_SSC	Patient	11	101	120	Peptid 11 - standard	1.625	3.75	-1.08923	0.5	0.5	0	0.45	1	1	Day A
1	B03	0.262	0.212763	-0.60747	110_SSC	Patient	14	131	150	Peptid 14 - standard	0.895	6.155	-0.140134	0	0.85	0.15	1	0.75	0.75	Day A
1	B04	0.275	0.231874	-0.593753	110_SSC	Patient	20	191	210	Peptid 20 - standard	-1.13	6.782	-0.637957	1	0	0	0	0.7	0.7	Day A
1	B05	0.281	0.240695	-0.587497	110_SSC	Patient	26	251	270	Peptid 26 - standard	1.85	10.526	1.86143	0	0.75	0.25	0.9	0.9	0.9	Day A
1	B06	0.368	0.368593	-0.499515	110_SSC	Patient	32	311	330	Peptid 32 - standard	0.5	8.798	1.81212	0	0.55	0.45	0.8	0.7	0.7	Day A
1	B07	0.649	0.781691	-0.197623	96_SSC	Patient	NA	NA	NA	Positive Control	NA	6.1	-0.0908091	NA	NA	NA	NA	NA	NA	Day A
1	B08	0.16	0.0628132	-0.734578	96_SSC	Patient	11	101	120	Peptid 11 - standard	1.625	3.75	-1.08923	0.5	0.5	0	0.45	1	1	Day A
1	B09	0.16	0.0628132	-0.734578	96_SSC	Patient	14	131	150	Peptid 14 - standard	0.895	6.155	-0.140134	0	0.85	0.15	1	0.75	0.75	Day A
1	B10	0.269	0.223054	-0.600055	96_SSC	Patient	20	191	210	Peptid 20 - standard	-1.13	6.782	-0.637957	1	0	0	0	0.7	0.7	Day A
1	B11	0.298	0.265687	-0.569973	96_SSC	Patient	26	251	270	Peptid 26 - standard	1.85	10.526	1.86143	0	0.75	0.25	0.9	0.9	0.9	Day A
1	B12	0.275	0.231874	-0.593753	96_SSC	Patient	32	311	330	Peptid 32 - standard	0.5	8.798	1.81212	0	0.55	0.45	0.8	0.7	0.7	Day A
1	C01	0.245	0.187771	-0.625823	110_SSC	Patient	1	1	20	Peptid 1 - standard	0.715	3.737	-3.91814	1	0	0	0	0.85	0.85	Day A
1	C02	0.281	0.240695	-0.587497	110_SSC	Patient	12	111	130	Peptid 12 - alternative	1.155	6.161	-0.138536	0.75	0.25	0	0	1	1	Day A
1	C03	0.274	0.230404	-0.5948	110_SSC	Patient	15	141	160	Peptid 15 - alternative	0.75	7.353	0.0262035	0	0.35	0.65	0.65	0.95	0.95	Day A
1	C04	0.362	0.359773	-0.505509	110_SSC	Patient	21	201	220	Peptid 21 - standard	-0.2	9.501	2.02619	0.6	0.4	0	0.25	1	1	Day A
1	C05	0.283	0.243635	-0.585421	110_SSC	Patient	27	261	280	Peptid 27 - standard	1.92	5.29	-0.972198	0.15	0.85	0	0.85	1	1	Day A
1	C06	0.49	0.547945	-0.375617	110_SSC	Patient	33	321	340	Peptid 33 - standard	0.25	11.38	2.86142	0	0.05	0.95	0.3	0.65	0.65	Day A
1	C07	0.131	0.0201804	-0.796045	96_SSC	Patient	1	1	20	Peptid 1 - standard	0.715	3.737	-3.91814	1	0	0	0	0.85	0.85	Day A
1	C08	0.177	0.0878049	-0.708679	96_SSC	Patient	12	111	130	Peptid 12 - alternative	1.155	6.161	-0.138536	0.75	0.25	0	0	1	1	Day A
1	C09	0.182	0.0951554	-0.701692	96_SSC	Patient	15	141	160	Peptid 15 - alternative	0.75	7.353	0.0262035	0	0.35	0.65	0.65	0.95	0.95	Day A
1	C10	0.681	0.828734	-0.158147	96_SSC	Patient	21	201	220	Peptid 21 - standard	-0.2	9.501	2.02619	0.6	0.4	0	0.25	1	1	Day A
1	C11	0.186	0.101036	-0.696259	96_SSC	Patient	27	261	280	Peptid 27 - standard	1.92	5.29	-0.972198	0.15	0.85	0	0.85	1	1	Day A
1	C12	0.492	0.550885	-0.373523	96_SSC	Patient	33	321	340	Peptid 33 - standard	0.25	11.38	2.86142	0	0.05	0.95	0.3	0.65	0.65	Day A
1	D01	0.273	0.228934	-0.595849	110_SSC	Patient	2	11	30	Peptid 2 - standard	-0.13	3.295	-4.08764	1	0	0	0	0.65	0.65	Day A
1	D02	0.26	0.209823	-0.609602	110_SSC	Patient	8	71	90	Peptid 8 - standard	0.305	10.398	0.910742	0	0.55	0.45	0.6	0.9	0.9	Day A
1	D03	0.385	0.393585	-0.482524	110_SSC	Patient	16	151	170	Peptid 16 - alternative	-0.105	12.204	3.0739	0	0.05	0.95	0.35	0.75	0.75	Day A
1	D04	0.305	0.275977	-0.562829	110_SSC	Patient	17	161	180	Peptid 17 - alternative	0.62	10.518	2.81369	0	0.55	0.45	0.7	0.8	0.8	Day A
1	D05	0.256	0.203943	-0.613887	110_SSC	Patient	28	271	290	Peptid 28 - standard	1.21	5.406	-0.970632	0.65	0.35	0	0.35	0.95	0.95	Day A
1	D06	0.701	0.858136	-0.132692	110_SSC	Patient	34	331	350	Peptid 34 - standard	-0.485	12.199	2.86142	0	0	1	0	0.45	0.45	Day A
1	D07	0.155	0.0554627	-0.743066	96_SSC	Patient	2	11	30	Peptid 2 - standard	-0.13	3.295	-4.08764	1	0	0	0	0.65	0.65	Day A
1	D08	0.193	0.111326	-0.687039	96_SSC	Patient	8	71	90	Peptid 8 - standard	0.305	10.398	0.910742	0	0.55	0.45	0.6	0.9	0.9	Day A
1	D09	0.412	0.433278	-0.455449	96_SSC	Patient	16	151	170	Peptid 16 - alternative	-0.105	12.204	3.0739	0	0.05	0.95	0.35	0.75	0.75	Day A
1	D10	0.218	0.148079	-0.656359	96_SSC	Patient	17	161	180	Peptid 17 - alternative	0.62	10.518	2.81369	0	0.55	0.45	0.7	0.8	0.8	Day A
1	D11	0.178	0.089275	-0.707263	96_SSC	Patient	28	271	290	Peptid 28 - standard	1.21	5.406	-0.970632	0.65	0.35	0	0.35	0.95	0.95	Day A
1	D12	0.725	0.893418	-0.101286	96_SSC	Patient	34	331	350	Peptid 34 - standard	-0.485	12.199	2.86142	0	0	1	0	0.45	0.45	Day A
1	E01	0.272	0.227464	-0.596898	110_SSC	Patient	3	21	40	Peptid 3 - standard	-1.26	3.226	-5.18152	1	0	0	0	0.45	0.45	Day A
1	E02	0.342	0.330371	-0.525513	110_SSC	Patient	9	81	100	Peptid 9 - standard	0.2	7.552	0.0786615	0	0.55	0.45	0.65	0.9	0.9	Day A
1	E03	0.303	0.273037	-0.564867	110_SSC	Patient	15	141	160	Peptid 15 - standard	0.75	7.353	0.0262035	0	0.35	0.65	0.65	0.95	0.95	Day A
1	E04	0.243	0.184831	-0.628019	110_SSC	Patient	23	221	240	Peptid 23 - alternative	1.925	7.352	0.0246369	0	0.65	0.35	0.95	1	1	Day A
1	E05	0.247	0.190712	-0.623635	110_SSC	Patient	24	231	250	Peptid 24 - alternative	0.505	10.134	3.02459	0	0.15	0.85	0.45	0.8	0.8	Day A
1	E06	0.42	0.445038	-0.44739	110_SSC	Patient	35	341	360	Peptid 35 - standard	-2.005	12.023	1.91229	0	0	1	0	0	0	Day A
1	E07	0.156	0.0569328	-0.741327	96_SSC	Patient	3	21	40	Peptid 3 - standard	-1.26	3.226	-5.18152	1	0	0	0	0.45	0.45	Day A
1	E08	0.348	0.339191	-0.519506	96_SSC	Patient	9	81	100	Peptid 9 - standard	0.2	7.552	0.0786615	0	0.55	0.45	0.65	0.9	0.9	Day A
1	E09	0.304	0.274507	-0.563848	96_SSC	Patient	15	141	160	Peptid 15 - standard	0.75	7.353	0.0262035	0	0.35	0.65	0.65	0.95	0.95	Day A
1	E10	0.147	0.043702	-0.75789	96_SSC	Patient	23	221	240	Peptid 23 - alternative	1.925	7.352	0.0246369	0	0.65	0.35	0.95	1	1	Day A
1	E11	0.156	0.0569328	-0.741327	96_SSC	Patient	24	231	250	Peptid 24 - alternative	0.505	10.134	3.02459	0	0.15	0.85	0.45	0.8	0.8	Day A
1	E12	0.146	0.0422319	-0.75988	96_SSC	Patient	35	341	360	Peptid 35 - standard	-2.005	12.023	1.91229	0	0	1	0	0	0	Day A
1	F01	0.278	0.236285	-0.59062	110_SSC	Patient	4	31	50	Peptid 4 - standard	-0.955	3.295	-4.22766	1	0	0	0	0.7	0.7	Day A
1	F02	0.277	0.234815	-0.591663	110_SSC	Patient	10	91	110	Peptid 10 - standard	1.82	5.292	-0.922889	0	1	0	0.95	1	1	Day A
1	F03	0.287	0.249516	-0.581281	110_SSC	Patient	16	151	170	Peptid 16 - standard	-0.105	12.204	3.0739	0	0.05	0.95	0.35	0.75	0.75	Day A
1	F04	0.256	0.203943	-0.613887	110_SSC	Patient	22	211	230	Peptid 22 - standard	1.5	12.5	1.90916	0.1	0.9	0	0.75	1	1	Day A
1	F05	0.228	0.16278	-0.644805	110_SSC	Patient	26	251	270	Peptid 26 - alternative	1.85	10.526	1.86143	0	0.75	0.25	0.9	0.9	0.9	Day A
1	F06	0.239	0.178951	-0.63244	110_SSC	Patient	NK	NA	NA	Negative Control	NA	6.1	-0.0908091	NA	NA	NA	NA	NA	NA	Day A
1	F07	0.14	0.0334113	-0.772668	96_SSC	Patient	4	31	50	Peptid 4 - standard	-0.955	3.295	-4.22766	1	0	0	0	0.7	0.7	Day A
1	F08	0.149	0.0466422	-0.754013	96_SSC	Patient	10	91	110	Peptid 10 - standard	1.82	5.292	-0.922889	0	1	0	0.95	1	1	Day A
1	F09	0.322	0.300969	-0.545609	96_SSC	Patient	16	151	170	Peptid 16 - standard	-0.105	12.204	3.0739	0	0.05	0.95	0.35	0.75	0.75	Day A
1	F10	0.341	0.328901	-0.526515	96_SSC	Patient	22	211	230	Peptid 22 - standard	1.5	12.5	1.90916	0.1	0.9	0	0.75	1	1	Day A
1	F11	0.163	0.0672235	-0.72971	96_SSC	Patient	26	251	270	Peptid 26 - alternative	1.85	10.526	1.86143	0	0.75	0.25	0.9	0.9	0.9	Day A
1	F12	0.154	0.0539927	-0.744827	96_SSC	Patient	NK	NA	NA	Negative Control	NA	6.1	-0.0908091	NA	NA	NA	NA	NA	NA	Day A
1	G01	0.292	0.256866	-0.576128	110_SSC	Patient	5	41	60	Peptid 5 - standard	-0.055	4.109	-1.13697	0.65	0.35	0	0.3	0.85	0.85	Day A
1	G02	0.257	0.205413	-0.612813	110_SSC	Patient	11	101	120	Peptid 11 - standard	1.625	3.75	-1.08923	0.5	0.5	0	0.45	1	1	Day A
1	G03	0.473	0.522954	-0.393301	110_SSC	Patient	17	161	180	Peptid 17 - standard	0.62	10.518	2.81369	0	0.55	0.45	0.7	0.8	0.8	Day A
1	G04	0.317	0.293618	-0.550658	110_SSC	Patient	23	221	240	Peptid 23 - standard	1.925	7.352	0.0246369	0	0.65	0.35	0.95	1	1	Day A
1	G05	0.236	0.174541	-0.635781	110_SSC	Patient	29	281	300	Peptid 29 - standard	-0.36	8.545	0.864581	0.9	0.1	0	0.05	0.75	0.75	Day A
1	G06	0.251	0.196592	-0.619283	110_SSC	Patient	31	301	320	Peptid 31 - alternative	0.845	7.249	-0.0230898	0	1	0	1	0.95	0.95	Day A
1	G07	0.294	0.259806	-0.574073	96_SSC	Patient	5	41	60	Peptid 5 - standard	-0.055	4.109	-1.13697	0.65	0.35	0	0.3	0.85	0.85	Day A
1	G08	0.187	0.102506	-0.694921	96_SSC	Patient	11	101	120	Peptid 11 - standard	1.625	3.75	-1.08923	0.5	0.5	0	0.45	1	1	Day A
1	G09	0.484	0.539125	-0.38188	96_SSC	Patient	17	161	180	Peptid 17 - standard	0.62	10.518	2.81369	0	0.55	0.45	0.7	0.8	0.8	Day A
1	G10	0.296	0.262746	-0.572021	96_SSC	Patient	23	221	240	Peptid 23 - standard	1.925	7.352	0.0246369	0	0.65	0.35	0.95	1	1	Day A
1	G11	0.317	0.293618	-0.550658	96_SSC	Patient	29	281	300	Peptid 29 - standard	-0.36	8.545	0.864581	0.9	0.1	0	0.05	0.75	0.75	Day A
1	G12	0.229	0.16425	-0.643667	96_SSC	Patient	31	301	320	Peptid 31 - alternative	0.845	7.249	-0.0230898	0	1	0	1	0.95	0.95	Day A
1	H01	0.254	0.201002	-0.61604	110_SSC	Patient	6	51	70	Peptid 6 - standard	1.495	6.332	-0.090825	0.15	0.85	0	0.8	0.9	0.9	Day A
1	H02	0.288	0.250986	-0.580248	110_SSC	Patient	12	111	130	Peptid 12 - standard	1.155	6.161	-0.138536	0.75	0.25	0	0	1	1	Day A
1	H03	0.227	0.16131	-0.645946	110_SSC	Patient	18	171	190	Peptid 18 - standard	2.07	3.75	-1.18468	0.05	0.95	0	0.9	1	1	Day A
1	H04	0.464	0.509723	-0.402589	110_SSC	Patient	24	231	250	Peptid 24 - standard	0.505	10.134	3.02459	0	0.15	0.85	0.45	0.8	0.8	Day A
1	H05	0.249	0.193652	-0.621455	110_SSC	Patient	30	291	310	Peptid 30 - standard	-0.43	9.299	1.0755	0.4	0.6	0	0.55	0.75	0.75	Day A
1	H06	0.245	0.187771	-0.625823	110_SSC	Patient	36	351	370	Peptid 36 - standard	-1.26667	4.426	-1.08768	0	0	1	0	0	0	Day A
1	H07	0.152	0.0510525	-0.748421	96_SSC	Patient	6	51	70	Peptid 6 - standard	1.495	6.332	-0.090825	0.15	0.85	0	0.8	0.9	0.9	Day A
1	H08	0.205	0.128968	-0.671937	96_SSC	Patient	12	111	130	Peptid 12 - standard	1.155	6.161	-0.138536	0.75	0.25	0	0	1	1	Day A
1	H09	0.154	0.0539927	-0.744827	96_SSC	Patient	18	171	190	Peptid 18 - standard	2.07	3.75	-1.18468	0.05	0.95	0	0.9	1	1	Day A
1	H10	0.524	0.597928	-0.339622	96_SSC	Patient	24	231	250	Peptid 24 - standard	0.505	10.134	3.02459	0	0.15	0.85	0.45	0.8	0.8	Day A
1	H11	0.151	0.0495824	-0.750257	96_SSC	Patient	30	291	310	Peptid 30 - standard	-0.43	9.299	1.0755	0.4	0.6	0	0.55	0.75	0.75	Day A
1	H12	0.148	0.0451721	-0.755935	96_SSC	Patient	36	351	370	Peptid 36 - standard	-1.26667	4.426	-1.08768	0	0	1	0	0	0	Day A
2	A01	0.045	0.0135272	-0.811429	117_SSC	Patient	7	61	80	Peptid 7 - alternative	2.035	6.1	-0.0908091	0	1	0	0.95	0.95	0.95	Day A
2	A02	0.086	0.0665773	-0.730414	117_SSC	Patient	7	61	80	Peptid 7 - standard	2.035	6.1	-0.0908091	0	1	0	0.95	0.95	0.95	Day A
2	A03	0.038	0.00446985	-0.844003	117_SSC	Patient	13	121	140	Peptid 13 - standard	1.06	8.523	0.858299	0.25	0.75	0	0.5	0.75	0.75	Day A
2	A04	0.048	0.0174089	-0.802011	117_SSC	Patient	19	181	200	Peptid 19 - standard	0.31	5.361	-1.7534	0.55	0.45	0	0.4	0.7	0.7	Day A
2	A05	0.145	0.142918	-0.660498	117_SSC	Patient	25	241	260	Peptid 25 - standard	0.845	13.102	4.90911	0	0.25	0.75	0.4	0.7	0.7	Day A
2	A06	0.061	0.0342297	-0.771411	117_SSC	Patient	31	301	320	Peptid 31 - standard	0.845	7.249	-0.0230898	0	1	0	1	0.95	0.95	Day A
2	A07	0.044	0.0122333	-0.814938	4716_NK	NHS	7	61	80	Peptid 7 - alternative	2.035	6.1	-0.0908091	0	1	0	0.95	0.95	0.95	Day A
2	A08	0.044	0.0122333	-0.814938	4716_NK	NHS	7	61	80	Peptid 7 - standard	2.035	6.1	-0.0908091	0	1	0	0.95	0.95	0.95	Day A
2	A09	0.043	0.0109394	-0.818689	4716_NK	NHS	13	121	140	Peptid 13 - standard	1.06	8.523	0.858299	0.25	0.75	0	0.5	0.75	0.75	Day A
2	A10	0.042	0.00964547	-0.822735	4716_NK	NHS	19	181	200	Peptid 19 - standard	0.31	5.361	-1.7534	0.55	0.45	0	0.4	0.7	0.7	Day A
2	A11	0.051	0.0212906	-0.793793	4716_NK	NHS	25	241	260	Peptid 25 - standard	0.845	13.102	4.90911	0	0.25	0.75	0.4	0.7	0.7	Day A
2	A12	0.046	0.0148211	-0.808124	4716_NK	NHS	31	301	320	Peptid 31 - standard	0.845	7.249	-0.0230898	0	1	0	1	0.95	0.95	Day A
2	B01	0.734	0.905027	-0.0907355	117_SSC	Patient	NA	NA	NA	Positive Control	NA	6.1	-0.0908091	NA	NA	NA	NA	NA	NA	Day A
2	B02	0.047	0.016115	-0.804992	117_SSC	Patient	11	101	120	Peptid 11 - standard	1.625	3.75	-1.08923	0.5	0.5	0	0.45	1	1	Day A
2	B03	0.047	0.016115	-0.804992	117_SSC	Patient	14	131	150	Peptid 14 - standard	0.895	6.155	-0.140134	0	0.85	0.15	1	0.75	0.75	Day A
2	B04	0.063	0.0368175	-0.767538	117_SSC	Patient	20	191	210	Peptid 20 - standard	-1.13	6.782	-0.637957	1	0	0	0	0.7	0.7	Day A
2	B05	0.074	0.0510504	-0.748424	117_SSC	Patient	26	251	270	Peptid 26 - standard	1.85	10.526	1.86143	0	0.75	0.25	0.9	0.9	0.9	Day A
2	B06	0.121	0.111864	-0.686567	117_SSC	Patient	32	311	330	Peptid 32 - standard	0.5	8.798	1.81212	0	0.55	0.45	0.8	0.7	0.7	Day A
2	B07	0.711	0.875268	-0.117563	4716_NK	NHS	NA	NA	NA	Positive Control	NA	6.1	-0.0908091	NA	NA	NA	NA	NA	NA	Day A
2	B08	0.049	0.0187028	-0.79916	4716_NK	NHS	11	101	120	Peptid 11 - standard	1.625	3.75	-1.08923	0.5	0.5	0	0.45	1	1	Day A
2	B09	0.046	0.0148211	-0.808124	4716_NK	NHS	14	131	150	Peptid 14 - standard	0.895	6.155	-0.140134	0	0.85	0.15	1	0.75	0.75	Day A
2	B10	0.046	0.0148211	-0.808124	4716_NK	NHS	20	191	210	Peptid 20 - standard	-1.13	6.782	-0.637957	1	0	0	0	0.7	0.7	Day A
2	B11	0.043	0.0109394	-0.818689	4716_NK	NHS	26	251	270	Peptid 26 - standard	1.85	10.526	1.86143	0	0.75	0.25	0.9	0.9	0.9	Day A
2	B12	0.046	0.0148211	-0.808124	4716_NK	NHS	32	311	330	Peptid 32 - standard	0.5	8.798	1.81212	0	0.55	0.45	0.8	0.7	0.7	Day A
2	C01	0.049	0.0187028	-0.79916	117_SSC	Patient	1	1	20	Peptid 1 - standard	0.715	3.737	-3.91814	1	0	0	0	0.85	0.85	Day A
2	C02	0.042	0.00964547	-0.822735	117_SSC	Patient	12	111	130	Peptid 12 - alternative	1.155	6.161	-0.138536	0.75	0.25	0	0	1	1	Day A
2	C03	0.124	0.115746	-0.683179	117_SSC	Patient	15	141	160	Peptid 15 - alternative	0.75	7.353	0.0262035	0	0.35	0.65	0.65	0.95	0.95	Day A
2	C04	0.112	0.100219	-0.697006	117_SSC	Patient	21	201	220	Peptid 21 - standard	-0.2	9.501	2.02619	0.6	0.4	0	0.25	1	1	Day A
2	C05	0.059	0.0316418	-0.775446	117_SSC	Patient	27	261	280	Peptid 27 - standard	1.92	5.29	-0.972198	0.15	0.85	0	0.85	1	1	Day A
2	C06	0.255	0.285247	-0.556423	117_SSC	Patient	33	321	340	Peptid 33 - standard	0.25	11.38	2.86142	0	0.05	0.95	0.3	0.65	0.65	Day A
2	C07	0.044	0.0122333	-0.814938	4716_NK	NHS	1	1	20	Peptid 1 - standard	0.715	3.737	-3.91814	1	0	0	0	0.85	0.85	Day A
2	C08	0.049	0.0187028	-0.79916	4716_NK	NHS	12	111	130	Peptid 12 - alternative	1.155	6.161	-0.138536	0.75	0.25	0	0	1	1	Day A
2	C09	0.045	0.0135272	-0.811429	4716_NK	NHS	15	141	160	Peptid 15 - alternative	0.75	7.353	0.0262035	0	0.35	0.65	0.65	0.95	0.95	Day A
2	C10	0.136	0.131272	-0.670019	4716_NK	NHS	21	201	220	Peptid 21 - standard	-0.2	9.501	2.02619	0.6	0.4	0	0.25	1	1	Day A
2	C11	0.043	0.0109394	-0.818689	4716_NK	NHS	27	261	280	Peptid 27 - standard	1.92	5.29	-0.972198	0.15	0.85	0	0.85	1	1	Day A
2	C12	0.08	0.0588138	-0.739133	4716_NK	NHS	33	321	340	Peptid 33 - standard	0.25	11.38	2.86142	0	0.05	0.95	0.3	0.65	0.65	Day A
2	D01	0.048	0.0174089	-0.802011	117_SSC	Patient	2	11	30	Peptid 2 - standard	-0.13	3.295	-4.08764	1	0	0	0	0.65	0.65	Day A
2	D02	0.042	0.00964547	-0.822735	117_SSC	Patient	8	71	90	Peptid 8 - standard	0.305	10.398	0.910742	0	0.55	0.45	0.6	0.9	0.9	Day A
2	D03	0.066	0.0406992	-0.761992	117_SSC	Patient	16	151	170	Peptid 16 - alternative	-0.105	12.204	3.0739	0	0.05	0.95	0.35	0.75	0.75	Day A
2	D04	0.054	0.0251723	-0.786417	117_SSC	Patient	17	161	180	Peptid 17 - alternative	0.62	10.518	2.81369	0	0.55	0.45	0.7	0.8	0.8	Day A
2	D05	0.039	0.00576376	-0.837561	117_SSC	Patient	28	271	290	Peptid 28 - standard	1.21	5.406	-0.970632	0.65	0.35	0	0.35	0.95	0.95	Day A
2	D06	0.457	0.546616	-0.376562	117_SSC	Patient	34	331	350	Peptid 34 - standard	-0.485	12.199	2.86142	0	0	1	0	0.45	0.45	Day A
2	D07	0.06	0.0329358	-0.773407	4716_NK	NHS	2	11	30	Peptid 2 - standard	-0.13	3.295	-4.08764	1	0	0	0	0.65	0.65	Day A
2	D08	0.047	0.016115	-0.804992	4716_NK	NHS	8	71	90	Peptid 8 - standard	0.305	10.398	0.910742	0	0.55	0.45	0.6	0.9	0.9	Day A
2	D09	0.079	0.0575199	-0.740639	4716_NK	NHS	16	151	170	Peptid 16 - alternative	-0.105	12.204	3.0739	0	0.05	0.95	0.35	0.75	0.75	Day A
2	D10	0.064	0.0381114	-0.765657	4716_NK	NHS	17	161	180	Peptid 17 - alternative	0.62	10.518	2.81369	0	0.55	0.45	0.7	0.8	0.8	Day A
2	D11	0.041	0.00835157	-0.827148	4716_NK	NHS	28	271	290	Peptid 28 - standard	1.21	5.406	-0.970632	0.65	0.35	0	0.35	0.95	0.95	Day A
2	D12	0.367	0.430164	-0.457579	4716_NK	NHS	34	331	350	Peptid 34 - standard	-0.485	12.199	2.86142	0	0	1	0	0.45	0.45	Day A
2	E01	0.05	0.0199967	-0.796425	117_SSC	Patient	3	21	40	Peptid 3 - standard	-1.26	3.226	-5.18152	1	0	0	0	0.45	0.45	Day A
2	E02	0.082	0.0614017	-0.73617	117_SSC	Patient	9	81	100	Peptid 9 - standard	0.2	7.552	0.0786615	0	0.55	0.45	0.65	0.9	0.9	Day A
2	E03	0.165	0.168796	-0.640167	117_SSC	Patient	15	141	160	Peptid 15 - standard	0.75	7.353	0.0262035	0	0.35	0.65	0.65	0.95	0.95	Day A
2	E04	0.046	0.0148211	-0.808124	117_SSC	Patient	23	221	240	Peptid 23 - alternative	1.925	7.352	0.0246369	0	0.65	0.35	0.95	1	1	Day A
2	E05	0.043	0.0109394	-0.818689	117_SSC	Patient	24	231	250	Peptid 24 - alternative	0.505	10.134	3.02459	0	0.15	0.85	0.45	0.8	0.8	Day A
2	E06	0.048	0.0174089	-0.802011	117_SSC	Patient	35	341	360	Peptid 35 - standard	-2.005	12.023	1.91229	0	0	1	0	0	0	Day A
2	E07	0.053	0.0238784	-0.788797	4716_NK	NHS	3	21	40	Peptid 3 - standard	-1.26	3.226	-5.18152	1	0	0	0	0.45	0.45	Day A
2	E08	0.064	0.0381114	-0.765657	4716_NK	NHS	9	81	100	Peptid 9 - standard	0.2	7.552	0.0786615	0	0.55	0.45	0.65	0.9	0.9	Day A
2	E09	0.051	0.0212906	-0.793793	4716_NK	NHS	15	141	160	Peptid 15 - standard	0.75	7.353	0.0262035	0	0.35	0.65	0.65	0.95	0.95	Day A
2	E10	0.042	0.00964547	-0.822735	4716_NK	NHS	23	221	240	Peptid 23 - alternative	1.925	7.352	0.0246369	0	0.65	0.35	0.95	1	1	Day A
2	E11	0.042	0.00964547	-0.822735	4716_NK	NHS	24	231	250	Peptid 24 - alternative	0.505	10.134	3.02459	0	0.15	0.85	0.45	0.8	0.8	Day A
2	E12	0.047	0.016115	-0.804992	4716_NK	NHS	35	341	360	Peptid 35 - standard	-2.005	12.023	1.91229	0	0	1	0	0	0	Day A
2	F01	0.047	0.016115	-0.804992	117_SSC	Patient	4	31	50	Peptid 4 - standard	-0.955	3.295	-4.22766	1	0	0	0	0.7	0.7	Day A
2	F02	0.044	0.0122333	-0.814938	117_SSC	Patient	10	91	110	Peptid 10 - standard	1.82	5.292	-0.922889	0	1	0	0.95	1	1	Day A
2	F03	0.04	0.00705766	-0.832036	117_SSC	Patient	16	151	170	Peptid 16 - standard	-0.105	12.204	3.0739	0	0.05	0.95	0.35	0.75	0.75	Day A
2	F04	0.04	0.00705766	-0.832036	117_SSC	Patient	22	211	230	Peptid 22 - standard	1.5	12.5	1.90916	0.1	0.9	0	0.75	1	1	Day A
2	F05	0.046	0.0148211	-0.808124	117_SSC	Patient	26	251	270	Peptid 26 - alternative	1.85	10.526	1.86143	0	0.75	0.25	0.9	0.9	0.9	Day A
2	F06	0.041	0.00835157	-0.827148	117_SSC	Patient	NK	NA	NA	Negative Control	NA	6.1	-0.0908091	NA	NA	NA	NA	NA	NA	Day A
2	F07	0.05	0.0199967	-0.796425	4716_NK	NHS	4	31	50	Peptid 4 - standard	-0.955	3.295	-4.22766	1	0	0	0	0.7	0.7	Day A
2	F08	0.044	0.0122333	-0.814938	4716_NK	NHS	10	91	110	Peptid 10 - standard	1.82	5.292	-0.922889	0	1	0	0.95	1	1	Day A
2	F09	0.047	0.016115	-0.804992	4716_NK	NHS	16	151	170	Peptid 16 - standard	-0.105	12.204	3.0739	0	0.05	0.95	0.35	0.75	0.75	Day A
2	F10	0.045	0.0135272	-0.811429	4716_NK	NHS	22	211	230	Peptid 22 - standard	1.5	12.5	1.90916	0.1	0.9	0	0.75	1	1	Day A
2	F11	0.04	0.00705766	-0.832036	4716_NK	NHS	26	251	270	Peptid 26 - alternative	1.85	10.526	1.86143	0	0.75	0.25	0.9	0.9	0.9	Day A
2	F12	0.044	0.0122333	-0.814938	4716_NK	NHS	NK	NA	NA	Negative Control	NA	6.1	-0.0908091	NA	NA	NA	NA	NA	NA	Day A
2	G01	0.046	0.0148211	-0.808124	117_SSC	Patient	5	41	60	Peptid 5 - standard	-0.055	4.109	-1.13697	0.65	0.35	0	0.3	0.85	0.85	Day A
2	G02	0.041	0.00835157	-0.827148	117_SSC	Patient	11	101	120	Peptid 11 - standard	1.625	3.75	-1.08923	0.5	0.5	0	0.45	1	1	Day A
2	G03	0.184	0.19338	-0.621656	117_SSC	Patient	17	161	180	Peptid 17 - standard	0.62	10.518	2.81369	0	0.55	0.45	0.7	0.8	0.8	Day A
2	G04	0.086	0.0665773	-0.730414	117_SSC	Patient	23	221	240	Peptid 23 - standard	1.925	7.352	0.0246369	0	0.65	0.35	0.95	1	1	Day A
2	G05	0.149	0.148093	-0.656347	117_SSC	Patient	29	281	300	Peptid 29 - standard	-0.36	8.545	0.864581	0.9	0.1	0	0.05	0.75	0.75	Day A
2	G06	0.05	0.0199967	-0.796425	117_SSC	Patient	31	301	320	Peptid 31 - alternative	0.845	7.249	-0.0230898	0	1	0	1	0.95	0.95	Day A
2	G07	0.055	0.0264662	-0.784105	4716_NK	NHS	5	41	60	Peptid 5 - standard	-0.055	4.109	-1.13697	0.65	0.35	0	0.3	0.85	0.85	Day A
2	G08	0.047	0.016115	-0.804992	4716_NK	NHS	11	101	120	Peptid 11 - standard	1.625	3.75	-1.08923	0.5	0.5	0	0.45	1	1	Day A
2	G09	0.166	0.17009	-0.639175	4716_NK	NHS	17	161	180	Peptid 17 - standard	0.62	10.518	2.81369	0	0.55	0.45	0.7	0.8	0.8	Day A
2	G10	0.046	0.0148211	-0.808124	4716_NK	NHS	23	221	240	Peptid 23 - standard	1.925	7.352	0.0246369	0	0.65	0.35	0.95	1	1	Day A
2	G11	0.049	0.0187028	-0.79916	4716_NK	NHS	29	281	300	Peptid 29 - standard	-0.36	8.545	0.864581	0.9	0.1	0	0.05	0.75	0.75	Day A
2	G12	0.047	0.016115	-0.804992	4716_NK	NHS	31	301	320	Peptid 31 - alternative	0.845	7.249	-0.0230898	0	1	0	1	0.95	0.95	Day A
2	H01	0.042	0.00964547	-0.822735	117_SSC	Patient	6	51	70	Peptid 6 - standard	1.495	6.332	-0.090825	0.15	0.85	0	0.8	0.9	0.9	Day A
2	H02	0.045	0.0135272	-0.811429	117_SSC	Patient	12	111	130	Peptid 12 - standard	1.155	6.161	-0.138536	0.75	0.25	0	0	1	1	Day A
2	H03	0.066	0.0406992	-0.761992	117_SSC	Patient	18	171	190	Peptid 18 - standard	2.07	3.75	-1.18468	0.05	0.95	0	0.9	1	1	Day A
2	H04	0.149	0.148093	-0.656347	117_SSC	Patient	24	231	250	Peptid 24 - standard	0.505	10.134	3.02459	0	0.15	0.85	0.45	0.8	0.8	Day A
2	H05	0.057	0.029054	-0.779668	117_SSC	Patient	30	291	310	Peptid 30 - standard	-0.43	9.299	1.0755	0.4	0.6	0	0.55	0.75	0.75	Day A
2	H06	0.051	0.0212906	-0.793793	117_SSC	Patient	36	351	370	Peptid 36 - standard	-1.26667	4.426	-1.08768	0	0	1	0	0	0	Day A
2	H07	0.048	0.0174089	-0.802011	4716_NK	NHS	6	51	70	Peptid 6 - standard	1.495	6.332	-0.090825	0.15	0.85	0	0.8	0.9	0.9	Day A
2	H08	0.056	0.0277601	-0.781857	4716_NK	NHS	12	111	130	Peptid 12 - standard	1.155	6.161	-0.138536	0.75	0.25	0	0	1	1	Day A
2	H09	0.056	0.0277601	-0.781857	4716_NK	NHS	18	171	190	Peptid 18 - standard	2.07	3.75	-1.18468	0.05	0.95	0	0.9	1	1	Day A
2	H10	0.107	0.0937493	-0.703011	4716_NK	NHS	24	231	250	Peptid 24 - standard	0.505	10.134	3.02459	0	0.15	0.85	0.45	0.8	0.8	Day A
2	H11	0.045	0.0135272	-0.811429	4716_NK	NHS	30	291	310	Peptid 30 - standard	-0.43	9.299	1.0755	0.4	0.6	0	0.55	0.75	0.75	Day A
2	H12	0.045	0.0135272	-0.811429	4716_NK	NHS	36	351	370	Peptid 36 - standard	-1.26667	4.426	-1.08768	0	0	1	0	0	0	Day A
3	A01	0.056	0.012944	-0.812984	85/16_NK	NHS	7	61	80	Peptid 7 - alternative	2.035	6.1	-0.0908091	0	1	0	0.95	0.95	0.95	Day B
3	A02	0.057	0.0139909	-0.810223	85/16_NK	NHS	7	61	80	Peptid 7 - standard	2.035	6.1	-0.0908091	0	1	0	0.95	0.95	0.95	Day B
3	A03	0.265	0.231755	-0.593839	85/16_NK	NHS	13	121	140	Peptid 13 - standard	1.06	8.523	0.858299	0.25	0.75	0	0.5	0.75	0.75	Day B
3	A04	0.059	0.0160848	-0.805064	85/16_NK	NHS	19	181	200	Peptid 19 - standard	0.31	5.361	-1.7534	0.55	0.45	0	0.4	0.7	0.7	Day B
3	A05	0.079	0.0370236	-0.767236	85/16_NK	NHS	25	241	260	Peptid 25 - standard	0.845	13.102	4.90911	0	0.25	0.75	0.4	0.7	0.7	Day B
3	A06	0.053	0.00980318	-0.822224	85/16_NK	NHS	31	301	320	Peptid 31 - standard	0.845	7.249	-0.0230898	0	1	0	1	0.95	0.95	Day B
3	A07	0.048	0.00456847	-0.843471	117_SSC	Patient	7	61	80	Peptid 7 - alternative	2.035	6.1	-0.0908091	0	1	0	0.95	0.95	0.95	Day B
3	A08	0.06	0.0171318	-0.802638	117_SSC	Patient	7	61	80	Peptid 7 - standard	2.035	6.1	-0.0908091	0	1	0	0.95	0.95	0.95	Day B
3	A09	0.315	0.284102	-0.557213	117_SSC	Patient	13	121	140	Peptid 13 - standard	1.06	8.523	0.858299	0.25	0.75	0	0.5	0.75	0.75	Day B
3	A10	0.049	0.00561541	-0.838246	117_SSC	Patient	19	181	200	Peptid 19 - standard	0.31	5.361	-1.7534	0.55	0.45	0	0.4	0.7	0.7	Day B
3	A11	0.077	0.0349298	-0.770348	117_SSC	Patient	25	241	260	Peptid 25 - standard	0.845	13.102	4.90911	0	0.25	0.75	0.4	0.7	0.7	Day B
3	A12	0.048	0.00456847	-0.843471	117_SSC	Patient	31	301	320	Peptid 31 - standard	0.845	7.249	-0.0230898	0	1	0	1	0.95	0.95	Day B
3	B01	0.079	0.0370236	-0.767236	85/16_NK	NHS	NA	NA	NA	Positive Control	NA	6.1	-0.0908091	NA	NA	NA	NA	NA	NA	Day B
3	B02	0.078	0.0359767	-0.76878	85/16_NK	NHS	11	101	120	Peptid 11 - standard	1.625	3.75	-1.08923	0.5	0.5	0	0.45	1	1	Day B
3	B03	0.153	0.114497	-0.684264	85/16_NK	NHS	14	131	150	Peptid 14 - standard	0.895	6.155	-0.140134	0	0.85	0.15	1	0.75	0.75	Day B
3	B04	0.544	0.523851	-0.392669	85/16_NK	NHS	20	191	210	Peptid 20 - standard	-1.13	6.782	-0.637957	1	0	0	0	0.7	0.7	Day B
3	B05	0.056	0.012944	-0.812984	85/16_NK	NHS	26	251	270	Peptid 26 - standard	1.85	10.526	1.86143	0	0.75	0.25	0.9	0.9	0.9	Day B
3	B06	0.06	0.0171318	-0.802638	85/16_NK	NHS	32	311	330	Peptid 32 - standard	0.5	8.798	1.81212	0	0.55	0.45	0.8	0.7	0.7	Day B
3	B07	0.072	0.0296951	-0.778603	117_SSC	Patient	NA	NA	NA	Positive Control	NA	6.1	-0.0908091	NA	NA	NA	NA	NA	NA	Day B
3	B08	0.05	0.00666235	-0.833646	117_SSC	Patient	11	101	120	Peptid 11 - standard	1.625	3.75	-1.08923	0.5	0.5	0	0.45	1	1	Day B
3	B09	0.173	0.135436	-0.666584	117_SSC	Patient	14	131	150	Peptid 14 - standard	0.895	6.155	-0.140134	0	0.85	0.15	1	0.75	0.75	Day B
3	B10	0.908	0.904938	-0.0908174	117_SSC	Patient	20	191	210	Peptid 20 - standard	-1.13	6.782	-0.637957	1	0	0	0	0.7	0.7	Day B
3	B11	0.051	0.00770929	-0.829507	117_SSC	Patient	26	251	270	Peptid 26 - standard	1.85	10.526	1.86143	0	0.75	0.25	0.9	0.9	0.9	Day B
3	B12	0.062	0.0192256	-0.798041	117_SSC	Patient	32	311	330	Peptid 32 - standard	0.5	8.798	1.81212	0	0.55	0.45	0.8	0.7	0.7	Day B
3	C01	0.061	0.0181787	-0.8003	85/16_NK	NHS	1	1	20	Peptid 1 - standard	0.715	3.737	-3.91814	1	0	0	0	0.85	0.85	Day B
3	C02	0.058	0.0150379	-0.807588	85/16_NK	NHS	12	111	130	Peptid 12 - alternative	1.155	6.161	-0.138536	0.75	0.25	0	0	1	1	Day B
3	C03	0.058	0.0150379	-0.807588	85/16_NK	NHS	15	141	160	Peptid 15 - alternative	0.75	7.353	0.0262035	0	0.35	0.65	0.65	0.95	0.95	Day B
3	C04	0.394	0.36681	-0.500727	85/16_NK	NHS	21	201	220	Peptid 21 - standard	-0.2	9.501	2.02619	0.6	0.4	0	0.25	1	1	Day B
3	C05	0.17	0.132295	-0.669172	85/16_NK	NHS	27	261	280	Peptid 27 - standard	1.92	5.29	-0.972198	0.15	0.85	0	0.85	1	1	Day B
3	C06	0.061	0.0181787	-0.8003	85/16_NK	NHS	33	321	340	Peptid 33 - standard	0.25	11.38	2.86142	0	0.05	0.95	0.3	0.65	0.65	Day B
3	C07	0.075	0.0328359	-0.773563	117_SSC	Patient	1	1	20	Peptid 1 - standard	0.715	3.737	-3.91814	1	0	0	0	0.85	0.85	Day B
3	C08	0.05	0.00666235	-0.833646	117_SSC	Patient	12	111	130	Peptid 12 - alternative	1.155	6.161	-0.138536	0.75	0.25	0	0	1	1	Day B
3	C09	0.052	0.00875623	-0.825723	117_SSC	Patient	15	141	160	Peptid 15 - alternative	0.75	7.353	0.0262035	0	0.35	0.65	0.65	0.95	0.95	Day B
3	C10	0.123	0.083089	-0.71329	117_SSC	Patient	21	201	220	Peptid 21 - standard	-0.2	9.501	2.02619	0.6	0.4	0	0.25	1	1	Day B
3	C11	0.078	0.0359767	-0.76878	117_SSC	Patient	27	261	280	Peptid 27 - standard	1.92	5.29	-0.972198	0.15	0.85	0	0.85	1	1	Day B
3	C12	0.059	0.0160848	-0.805064	117_SSC	Patient	33	321	340	Peptid 33 - standard	0.25	11.38	2.86142	0	0.05	0.95	0.3	0.65	0.65	Day B
3	D01	0.074	0.0317889	-0.775212	85/16_NK	NHS	2	11	30	Peptid 2 - standard	-0.13	3.295	-4.08764	1	0	0	0	0.65	0.65	Day B
3	D02	0.057	0.0139909	-0.810223	85/16_NK	NHS	8	71	90	Peptid 8 - standard	0.305	10.398	0.910742	0	0.55	0.45	0.6	0.9	0.9	Day B
3	D03	0.057	0.0139909	-0.810223	85/16_NK	NHS	16	151	170	Peptid 16 - alternative	-0.105	12.204	3.0739	0	0.05	0.95	0.35	0.75	0.75	Day B
3	D04	0.123	0.083089	-0.71329	85/16_NK	NHS	17	161	180	Peptid 17 - alternative	0.62	10.518	2.81369	0	0.55	0.45	0.7	0.8	0.8	Day B
3	D05	0.185	0.147999	-0.656422	85/16_NK	NHS	28	271	290	Peptid 28 - standard	1.21	5.406	-0.970632	0.65	0.35	0	0.35	0.95	0.95	Day B
3	D06	0.062	0.0192256	-0.798041	85/16_NK	NHS	34	331	350	Peptid 34 - standard	-0.485	12.199	2.86142	0	0	1	0	0.45	0.45	Day B
3	D07	0.091	0.0495869	-0.750251	117_SSC	Patient	2	11	30	Peptid 2 - standard	-0.13	3.295	-4.08764	1	0	0	0	0.65	0.65	Day B
3	D08	0.057	0.0139909	-0.810223	117_SSC	Patient	8	71	90	Peptid 8 - standard	0.305	10.398	0.910742	0	0.55	0.45	0.6	0.9	0.9	Day B
3	D09	0.057	0.0139909	-0.810223	117_SSC	Patient	16	151	170	Peptid 16 - alternative	-0.105	12.204	3.0739	0	0.05	0.95	0.35	0.75	0.75	Day B
3	D10	0.231	0.196159	-0.619603	117_SSC	Patient	17	161	180	Peptid 17 - alternative	0.62	10.518	2.81369	0	0.55	0.45	0.7	0.8	0.8	Day B
3	D11	0.218	0.182548	-0.629731	117_SSC	Patient	28	271	290	Peptid 28 - standard	1.21	5.406	-0.970632	0.65	0.35	0	0.35	0.95	0.95	Day B
3	D12	0.058	0.0150379	-0.807588	117_SSC	Patient	34	331	350	Peptid 34 - standard	-0.485	12.199	2.86142	0	0	1	0	0.45	0.45	Day B
3	E01	0.262	0.228614	-0.596077	85/16_NK	NHS	3	21	40	Peptid 3 - standard	-1.26	3.226	-5.18152	1	0	0	0	0.45	0.45	Day B
3	E02	0.055	0.0118971	-0.815888	85/16_NK	NHS	9	81	100	Peptid 9 - standard	0.2	7.552	0.0786615	0	0.55	0.45	0.65	0.9	0.9	Day B
3	E03	0.1	0.0590094	-0.738907	85/16_NK	NHS	15	141	160	Peptid 15 - standard	0.75	7.353	0.0262035	0	0.35	0.65	0.65	0.95	0.95	Day B
3	E04	0.397	0.369951	-0.498592	85/16_NK	NHS	23	221	240	Peptid 23 - alternative	1.925	7.352	0.0246369	0	0.65	0.35	0.95	1	1	Day B
3	E05	0.078	0.0359767	-0.76878	85/16_NK	NHS	24	231	250	Peptid 24 - alternative	0.505	10.134	3.02459	0	0.15	0.85	0.45	0.8	0.8	Day B
3	E06	0.065	0.0223665	-0.791675	85/16_NK	NHS	35	341	360	Peptid 35 - standard	-2.005	12.023	1.91229	0	0	1	0	0	0	Day B
3	E07	0.203	0.166844	-0.641666	117_SSC	Patient	3	21	40	Peptid 3 - standard	-1.26	3.226	-5.18152	1	0	0	0	0.45	0.45	Day B
3	E08	0.048	0.00456847	-0.843471	117_SSC	Patient	9	81	100	Peptid 9 - standard	0.2	7.552	0.0786615	0	0.55	0.45	0.65	0.9	0.9	Day B
3	E09	0.061	0.0181787	-0.8003	117_SSC	Patient	15	141	160	Peptid 15 - standard	0.75	7.353	0.0262035	0	0.35	0.65	0.65	0.95	0.95	Day B
3	E10	0.194	0.157422	-0.648978	117_SSC	Patient	23	221	240	Peptid 23 - alternative	1.925	7.352	0.0246369	0	0.65	0.35	0.95	1	1	Day B
3	E11	0.06	0.0171318	-0.802638	117_SSC	Patient	24	231	250	Peptid 24 - alternative	0.505	10.134	3.02459	0	0.15	0.85	0.45	0.8	0.8	Day B
3	E12	0.054	0.0108501	-0.818958	117_SSC	Patient	35	341	360	Peptid 35 - standard	-2.005	12.023	1.91229	0	0	1	0	0	0	Day B
3	F01	0.592	0.574104	-0.35689	85/16_NK	NHS	4	31	50	Peptid 4 - standard	-0.955	3.295	-4.22766	1	0	0	0	0.7	0.7	Day B
3	F02	0.086	0.0443522	-0.757022	85/16_NK	NHS	10	91	110	Peptid 10 - standard	1.82	5.292	-0.922889	0	1	0	0.95	1	1	Day B
3	F03	0.145	0.106122	-0.69166	85/16_NK	NHS	16	151	170	Peptid 16 - standard	-0.105	12.204	3.0739	0	0.05	0.95	0.35	0.75	0.75	Day B
3	F04	0.075	0.0328359	-0.773563	85/16_NK	NHS	22	211	230	Peptid 22 - standard	1.5	12.5	1.90916	0.1	0.9	0	0.75	1	1	Day B
3	F05	0.068	0.0255073	-0.785812	85/16_NK	NHS	26	251	270	Peptid 26 - alternative	1.85	10.526	1.86143	0	0.75	0.25	0.9	0.9	0.9	Day B
3	F06	0.055	0.0118971	-0.815888	85/16_NK	NHS	NK	NA	NA	Negative Control	NA	6.1	-0.0908091	NA	NA	NA	NA	NA	NA	Day B
3	F07	0.504	0.481974	-0.421921	117_SSC	Patient	4	31	50	Peptid 4 - standard	-0.955	3.295	-4.22766	1	0	0	0	0.7	0.7	Day B
3	F08	0.081	0.0391175	-0.764217	117_SSC	Patient	10	91	110	Peptid 10 - standard	1.82	5.292	-0.922889	0	1	0	0.95	1	1	Day B
3	F09	0.092	0.0506339	-0.748941	117_SSC	Patient	16	151	170	Peptid 16 - standard	-0.105	12.204	3.0739	0	0.05	0.95	0.35	0.75	0.75	Day B
3	F10	0.084	0.0422583	-0.759844	117_SSC	Patient	22	211	230	Peptid 22 - standard	1.5	12.5	1.90916	0.1	0.9	0	0.75	1	1	Day B
3	F11	0.06	0.0171318	-0.802638	117_SSC	Patient	26	251	270	Peptid 26 - alternative	1.85	10.526	1.86143	0	0.75	0.25	0.9	0.9	0.9	Day B
3	F12	0.059	0.0160848	-0.805064	117_SSC	Patient	NK	NA	NA	Negative Control	NA	6.1	-0.0908091	NA	NA	NA	NA	NA	NA	Day B
3	G01	0.123	0.083089	-0.71329	85/16_NK	NHS	5	41	60	Peptid 5 - standard	-0.055	4.109	-1.13697	0.65	0.35	0	0.3	0.85	0.85	Day B
3	G02	0.087	0.0453992	-0.755636	85/16_NK	NHS	11	101	120	Peptid 11 - standard	1.625	3.75	-1.08923	0.5	0.5	0	0.45	1	1	Day B
3	G03	0.072	0.0296951	-0.778603	85/16_NK	NHS	17	161	180	Peptid 17 - standard	0.62	10.518	2.81369	0	0.55	0.45	0.7	0.8	0.8	Day B
3	G04	0.069	0.0265542	-0.78395	85/16_NK	NHS	23	221	240	Peptid 23 - standard	1.925	7.352	0.0246369	0	0.65	0.35	0.95	1	1	Day B
3	G05	0.068	0.0255073	-0.785812	85/16_NK	NHS	29	281	300	Peptid 29 - standard	-0.36	8.545	0.864581	0.9	0.1	0	0.05	0.75	0.75	Day B
3	G06	0.201	0.16475	-0.643281	85/16_NK	NHS	31	301	320	Peptid 31 - alternative	0.845	7.249	-0.0230898	0	1	0	1	0.95	0.95	Day B
3	G07	0.486	0.463129	-0.434949	117_SSC	Patient	5	41	60	Peptid 5 - standard	-0.055	4.109	-1.13697	0.65	0.35	0	0.3	0.85	0.85	Day B
3	G08	0.081	0.0391175	-0.764217	117_SSC	Patient	11	101	120	Peptid 11 - standard	1.625	3.75	-1.08923	0.5	0.5	0	0.45	1	1	Day B
3	G09	0.079	0.0370236	-0.767236	117_SSC	Patient	17	161	180	Peptid 17 - standard	0.62	10.518	2.81369	0	0.55	0.45	0.7	0.8	0.8	Day B
3	G10	0.067	0.0244603	-0.787717	117_SSC	Patient	23	221	240	Peptid 23 - standard	1.925	7.352	0.0246369	0	0.65	0.35	0.95	1	1	Day B
3	G11	0.059	0.0160848	-0.805064	117_SSC	Patient	29	281	300	Peptid 29 - standard	-0.36	8.545	0.864581	0.9	0.1	0	0.05	0.75	0.75	Day B
3	G12	0.203	0.166844	-0.641666	117_SSC	Patient	31	301	320	Peptid 31 - alternative	0.845	7.249	-0.0230898	0	1	0	1	0.95	0.95	Day B
3	H01	0.211	0.17522	-0.635265	85/16_NK	NHS	6	51	70	Peptid 6 - standard	1.495	6.332	-0.090825	0.15	0.85	0	0.8	0.9	0.9	Day B
3	H02	0.145	0.106122	-0.69166	85/16_NK	NHS	12	111	130	Peptid 12 - standard	1.155	6.161	-0.138536	0.75	0.25	0	0	1	1	Day B
3	H03	0.107	0.066338	-0.730675	85/16_NK	NHS	18	171	190	Peptid 18 - standard	2.07	3.75	-1.18468	0.05	0.95	0	0.9	1	1	Day B
3	H04	0.074	0.0317889	-0.775212	85/16_NK	NHS	24	231	250	Peptid 24 - standard	0.505	10.134	3.02459	0	0.15	0.85	0.45	0.8	0.8	Day B
3	H05	0.104	0.0631972	-0.734148	85/16_NK	NHS	30	291	310	Peptid 30 - standard	-0.43	9.299	1.0755	0.4	0.6	0	0.55	0.75	0.75	Day B
3	H06	0.061	0.0181787	-0.8003	85/16_NK	NHS	36	351	370	Peptid 36 - standard	-1.26667	4.426	-1.08768	0	0	1	0	0	0	Day B
3	H07	0.251	0.217097	-0.604338	117_SSC	Patient	6	51	70	Peptid 6 - standard	1.495	6.332	-0.090825	0.15	0.85	0	0.8	0.9	0.9	Day B
3	H08	0.247	0.21291	-0.607364	117_SSC	Patient	12	111	130	Peptid 12 - standard	1.155	6.161	-0.138536	0.75	0.25	0	0	1	1	Day B
3	H09	0.083	0.0412114	-0.761282	117_SSC	Patient	18	171	190	Peptid 18 - standard	2.07	3.75	-1.18468	0.05	0.95	0	0.9	1	1	Day B
3	H10	0.073	0.030742	-0.776892	117_SSC	Patient	24	231	250	Peptid 24 - standard	0.505	10.134	3.02459	0	0.15	0.85	0.45	0.8	0.8	Day B
3	H11	0.225	0.189877	-0.624255	117_SSC	Patient	30	291	310	Peptid 30 - standard	-0.43	9.299	1.0755	0.4	0.6	0	0.55	0.75	0.75	Day B
3	H12	0.073	0.030742	-0.776892	117_SSC	Patient	36	351	370	Peptid 36 - standard	-1.26667	4.426	-1.08768	0	0	1	0	0	0	Day B
4	A01	0.059	0.0292573	-0.779329	216_SSC	Patient	7	61	80	Peptid 7 - alternative	2.035	6.1	-0.0908091	0	1	0	0.95	0.95	0.95	Day A
4	A02	0.082	0.0602284	-0.737506	216_SSC	Patient	7	61	80	Peptid 7 - standard	2.035	6.1	-0.0908091	0	1	0	0.95	0.95	0.95	Day A
4	A03	0.055	0.023871	-0.788811	216_SSC	Patient	13	121	140	Peptid 13 - standard	1.06	8.523	0.858299	0.25	0.75	0	0.5	0.75	0.75	Day A
4	A04	0.062	0.033297	-0.772845	216_SSC	Patient	19	181	200	Peptid 19 - standard	0.31	5.361	-1.7534	0.55	0.45	0	0.4	0.7	0.7	Day A
4	A05	0.131	0.12621	-0.674246	216_SSC	Patient	25	241	260	Peptid 25 - standard	0.845	13.102	4.90911	0	0.25	0.75	0.4	0.7	0.7	Day A
4	A06	0.071	0.0454162	-0.755614	216_SSC	Patient	31	301	320	Peptid 31 - standard	0.845	7.249	-0.0230898	0	1	0	1	0.95	0.95	Day A
4	A07	0.047	0.0130985	-0.812568	1916_NK	NHS	7	61	80	Peptid 7 - alternative	2.035	6.1	-0.0908091	0	1	0	0.95	0.95	0.95	Day A
4	A08	0.048	0.014445	-0.809066	1916_NK	NHS	7	61	80	Peptid 7 - standard	2.035	6.1	-0.0908091	0	1	0	0.95	0.95	0.95	Day A
4	A09	0.044	0.00905875	-0.824685	1916_NK	NHS	13	121	140	Peptid 13 - standard	1.06	8.523	0.858299	0.25	0.75	0	0.5	0.75	0.75	Day A
4	A10	0.057	0.0265642	-0.783933	1916_NK	NHS	19	181	200	Peptid 19 - standard	0.31	5.361	-1.7534	0.55	0.45	0	0.4	0.7	0.7	Day A
4	A11	0.054	0.0225245	-0.791369	1916_NK	NHS	25	241	260	Peptid 25 - standard	0.845	13.102	4.90911	0	0.25	0.75	0.4	0.7	0.7	Day A
4	A12	0.06	0.0306039	-0.777115	1916_NK	NHS	31	301	320	Peptid 31 - standard	0.845	7.249	-0.0230898	0	1	0	1	0.95	0.95	Day A
4	B01	0.682	0.868171	-0.123858	216_SSC	Patient	NA	NA	NA	Positive Control	NA	6.1	-0.0908091	NA	NA	NA	NA	NA	NA	Day A
4	B02	0.071	0.0454162	-0.755614	216_SSC	Patient	11	101	120	Peptid 11 - standard	1.625	3.75	-1.08923	0.5	0.5	0	0.45	1	1	Day A
4	B03	0.056	0.0252176	-0.786335	216_SSC	Patient	14	131	150	Peptid 14 - standard	0.895	6.155	-0.140134	0	0.85	0.15	1	0.75	0.75	Day A
4	B04	0.063	0.0346436	-0.770781	216_SSC	Patient	20	191	210	Peptid 20 - standard	-1.13	6.782	-0.637957	1	0	0	0	0.7	0.7	Day A
4	B05	0.103	0.0885064	-0.708002	216_SSC	Patient	26	251	270	Peptid 26 - standard	1.85	10.526	1.86143	0	0.75	0.25	0.9	0.9	0.9	Day A
4	B06	0.067	0.0400299	-0.762928	216_SSC	Patient	32	311	330	Peptid 32 - standard	0.5	8.798	1.81212	0	0.55	0.45	0.8	0.7	0.7	Day A
4	B07	0.709	0.904528	-0.0911915	1916_NK	NHS	NA	NA	NA	Positive Control	NA	6.1	-0.0908091	NA	NA	NA	NA	NA	NA	Day A
4	B08	0.047	0.0130985	-0.812568	1916_NK	NHS	11	101	120	Peptid 11 - standard	1.625	3.75	-1.08923	0.5	0.5	0	0.45	1	1	Day A
4	B09	0.051	0.0184847	-0.799632	1916_NK	NHS	14	131	150	Peptid 14 - standard	0.895	6.155	-0.140134	0	0.85	0.15	1	0.75	0.75	Day A
4	B10	0.046	0.0117519	-0.816303	1916_NK	NHS	20	191	210	Peptid 20 - standard	-1.13	6.782	-0.637957	1	0	0	0	0.7	0.7	Day A
4	B11	0.045	0.0104053	-0.82032	1916_NK	NHS	26	251	270	Peptid 26 - standard	1.85	10.526	1.86143	0	0.75	0.25	0.9	0.9	0.9	Day A
4	B12	0.043	0.00771218	-0.829496	1916_NK	NHS	32	311	330	Peptid 32 - standard	0.5	8.798	1.81212	0	0.55	0.45	0.8	0.7	0.7	Day A
4	C01	0.049	0.0157916	-0.80576	216_SSC	Patient	1	1	20	Peptid 1 - standard	0.715	3.737	-3.91814	1	0	0	0	0.85	0.85	Day A
4	C02	0.062	0.033297	-0.772845	216_SSC	Patient	12	111	130	Peptid 12 - alternative	1.155	6.161	-0.138536	0.75	0.25	0	0	1	1	Day A
4	C03	0.059	0.0292573	-0.779329	216_SSC	Patient	15	141	160	Peptid 15 - alternative	0.75	7.353	0.0262035	0	0.35	0.65	0.65	0.95	0.95	Day A
4	C04	0.135	0.131597	-0.66975	216_SSC	Patient	21	201	220	Peptid 21 - standard	-0.2	9.501	2.02619	0.6	0.4	0	0.25	1	1	Day A
4	C05	0.061	0.0319504	-0.774956	216_SSC	Patient	27	261	280	Peptid 27 - standard	1.92	5.29	-0.972198	0.15	0.85	0	0.85	1	1	Day A
4	C06	0.238	0.270293	-0.566771	216_SSC	Patient	33	321	340	Peptid 33 - standard	0.25	11.38	2.86142	0	0.05	0.95	0.3	0.65	0.65	Day A
4	C07	0.05	0.0171382	-0.802623	1916_NK	NHS	1	1	20	Peptid 1 - standard	0.715	3.737	-3.91814	1	0	0	0	0.85	0.85	Day A
4	C08	0.044	0.00905875	-0.824685	1916_NK	NHS	12	111	130	Peptid 12 - alternative	1.155	6.161	-0.138536	0.75	0.25	0	0	1	1	Day A
4	C09	0.052	0.0198313	-0.796768	1916_NK	NHS	15	141	160	Peptid 15 - alternative	0.75	7.353	0.0262035	0	0.35	0.65	0.65	0.95	0.95	Day A
4	C10	0.089	0.0696544	-0.72709	1916_NK	NHS	21	201	220	Peptid 21 - standard	-0.2	9.501	2.02619	0.6	0.4	0	0.25	1	1	Day A
4	C11	0.049	0.0157916	-0.80576	1916_NK	NHS	27	261	280	Peptid 27 - standard	1.92	5.29	-0.972198	0.15	0.85	0	0.85	1	1	Day A
4	C12	0.167	0.174687	-0.635669	1916_NK	NHS	33	321	340	Peptid 33 - standard	0.25	11.38	2.86142	0	0.05	0.95	0.3	0.65	0.65	Day A
4	D01	0.058	0.0279107	-0.781599	216_SSC	Patient	2	11	30	Peptid 2 - standard	-0.13	3.295	-4.08764	1	0	0	0	0.65	0.65	Day A
4	D02	0.069	0.042723	-0.759211	216_SSC	Patient	8	71	90	Peptid 8 - standard	0.305	10.398	0.910742	0	0.55	0.45	0.6	0.9	0.9	Day A
4	D03	0.123	0.115438	-0.683446	216_SSC	Patient	16	151	170	Peptid 16 - alternative	-0.105	12.204	3.0739	0	0.05	0.95	0.35	0.75	0.75	Day A
4	D04	0.107	0.0938927	-0.702876	216_SSC	Patient	17	161	180	Peptid 17 - alternative	0.62	10.518	2.81369	0	0.55	0.45	0.7	0.8	0.8	Day A
4	D05	0.046	0.0117519	-0.816303	216_SSC	Patient	28	271	290	Peptid 28 - standard	1.21	5.406	-0.970632	0.65	0.35	0	0.35	0.95	0.95	Day A
4	D06	0.415	0.508636	-0.403349	216_SSC	Patient	34	331	350	Peptid 34 - standard	-0.485	12.199	2.86142	0	0	1	0	0.45	0.45	Day A
4	D07	0.049	0.0157916	-0.80576	1916_NK	NHS	2	11	30	Peptid 2 - standard	-0.13	3.295	-4.08764	1	0	0	0	0.65	0.65	Day A
4	D08	0.048	0.014445	-0.809066	1916_NK	NHS	8	71	90	Peptid 8 - standard	0.305	10.398	0.910742	0	0.55	0.45	0.6	0.9	0.9	Day A
4	D09	0.07	0.0440696	-0.757398	1916_NK	NHS	16	151	170	Peptid 16 - alternative	-0.105	12.204	3.0739	0	0.05	0.95	0.35	0.75	0.75	Day A
4	D10	0.058	0.0279107	-0.781599	1916_NK	NHS	17	161	180	Peptid 17 - alternative	0.62	10.518	2.81369	0	0.55	0.45	0.7	0.8	0.8	Day A
4	D11	0.041	0.00501904	-0.841132	1916_NK	NHS	28	271	290	Peptid 28 - standard	1.21	5.406	-0.970632	0.65	0.35	0	0.35	0.95	0.95	Day A
4	D12	0.391	0.476319	-0.425838	1916_NK	NHS	34	331	350	Peptid 34 - standard	-0.485	12.199	2.86142	0	0	1	0	0.45	0.45	Day A
4	E01	0.111	0.099279	-0.697869	216_SSC	Patient	3	21	40	Peptid 3 - standard	-1.26	3.226	-5.18152	1	0	0	0	0.45	0.45	Day A
4	E02	0.145	0.145062	-0.658772	216_SSC	Patient	9	81	100	Peptid 9 - standard	0.2	7.552	0.0786615	0	0.55	0.45	0.65	0.9	0.9	Day A
4	E03	0.062	0.033297	-0.772845	216_SSC	Patient	15	141	160	Peptid 15 - standard	0.75	7.353	0.0262035	0	0.35	0.65	0.65	0.95	0.95	Day A
4	E04	0.046	0.0117519	-0.816303	216_SSC	Patient	23	221	240	Peptid 23 - alternative	1.925	7.352	0.0246369	0	0.65	0.35	0.95	1	1	Day A
4	E05	0.046	0.0117519	-0.816303	216_SSC	Patient	24	231	250	Peptid 24 - alternative	0.505	10.134	3.02459	0	0.15	0.85	0.45	0.8	0.8	Day A
4	E06	0.396	0.483052	-0.421173	216_SSC	Patient	35	341	360	Peptid 35 - standard	-2.005	12.023	1.91229	0	0	1	0	0	0	Day A
4	E07	0.047	0.0130985	-0.812568	1916_NK	NHS	3	21	40	Peptid 3 - standard	-1.26	3.226	-5.18152	1	0	0	0	0.45	0.45	Day A
4	E08	0.08	0.0575353	-0.740621	1916_NK	NHS	9	81	100	Peptid 9 - standard	0.2	7.552	0.0786615	0	0.55	0.45	0.65	0.9	0.9	Day A
4	E09	0.054	0.0225245	-0.791369	1916_NK	NHS	15	141	160	Peptid 15 - standard	0.75	7.353	0.0262035	0	0.35	0.65	0.65	0.95	0.95	Day A
4	E10	0.041	0.00501904	-0.841132	1916_NK	NHS	23	221	240	Peptid 23 - alternative	1.925	7.352	0.0246369	0	0.65	0.35	0.95	1	1	Day A
4	E11	0.042	0.00636561	-0.834898	1916_NK	NHS	24	231	250	Peptid 24 - alternative	0.505	10.134	3.02459	0	0.15	0.85	0.45	0.8	0.8	Day A
4	E12	0.046	0.0117519	-0.816303	1916_NK	NHS	35	341	360	Peptid 35 - standard	-2.005	12.023	1.91229	0	0	1	0	0	0	Day A
4	F01	0.072	0.0467627	-0.753856	216_SSC	Patient	4	31	50	Peptid 4 - standard	-0.955	3.295	-4.22766	1	0	0	0	0.7	0.7	Day A
4	F02	0.074	0.0494559	-0.750416	216_SSC	Patient	10	91	110	Peptid 10 - standard	1.82	5.292	-0.922889	0	1	0	0.95	1	1	Day A
4	F03	0.063	0.0346436	-0.770781	216_SSC	Patient	16	151	170	Peptid 16 - standard	-0.105	12.204	3.0739	0	0.05	0.95	0.35	0.75	0.75	Day A
4	F04	0.048	0.014445	-0.809066	216_SSC	Patient	22	211	230	Peptid 22 - standard	1.5	12.5	1.90916	0.1	0.9	0	0.75	1	1	Day A
4	F05	0.098	0.0817736	-0.714596	216_SSC	Patient	26	251	270	Peptid 26 - alternative	1.85	10.526	1.86143	0	0.75	0.25	0.9	0.9	0.9	Day A
4	F06	0.051	0.0184847	-0.799632	216_SSC	Patient	NK	NA	NA	Negative Control	NA	6.1	-0.0908091	NA	NA	NA	NA	NA	NA	Day A
4	F07	0.049	0.0157916	-0.80576	1916_NK	NHS	4	31	50	Peptid 4 - standard	-0.955	3.295	-4.22766	1	0	0	0	0.7	0.7	Day A
4	F08	0.046	0.0117519	-0.816303	1916_NK	NHS	10	91	110	Peptid 10 - standard	1.82	5.292	-0.922889	0	1	0	0.95	1	1	Day A
4	F09	0.045	0.0104053	-0.82032	1916_NK	NHS	16	151	170	Peptid 16 - standard	-0.105	12.204	3.0739	0	0.05	0.95	0.35	0.75	0.75	Day A
4	F10	0.044	0.00905875	-0.824685	1916_NK	NHS	22	211	230	Peptid 22 - standard	1.5	12.5	1.90916	0.1	0.9	0	0.75	1	1	Day A
4	F11	0.043	0.00771218	-0.829496	1916_NK	NHS	26	251	270	Peptid 26 - alternative	1.85	10.526	1.86143	0	0.75	0.25	0.9	0.9	0.9	Day A
4	F12	0.046	0.0117519	-0.816303	1916_NK	NHS	NK	NA	NA	Negative Control	NA	6.1	-0.0908091	NA	NA	NA	NA	NA	NA	Day A
4	G01	0.061	0.0319504	-0.774956	216_SSC	Patient	5	41	60	Peptid 5 - standard	-0.055	4.109	-1.13697	0.65	0.35	0	0.3	0.85	0.85	Day A
4	G02	0.079	0.0561887	-0.742204	216_SSC	Patient	11	101	120	Peptid 11 - standard	1.625	3.75	-1.08923	0.5	0.5	0	0.45	1	1	Day A
4	G03	0.421	0.516716	-0.397685	216_SSC	Patient	17	161	180	Peptid 17 - standard	0.62	10.518	2.81369	0	0.55	0.45	0.7	0.8	0.8	Day A
4	G04	0.107	0.0938927	-0.702876	216_SSC	Patient	23	221	240	Peptid 23 - standard	1.925	7.352	0.0246369	0	0.65	0.35	0.95	1	1	Day A
4	G05	0.096	0.0790804	-0.717298	216_SSC	Patient	29	281	300	Peptid 29 - standard	-0.36	8.545	0.864581	0.9	0.1	0	0.05	0.75	0.75	Day A
4	G06	0.104	0.089853	-0.706709	216_SSC	Patient	31	301	320	Peptid 31 - alternative	0.845	7.249	-0.0230898	0	1	0	1	0.95	0.95	Day A
4	G07	0.057	0.0265642	-0.783933	1916_NK	NHS	5	41	60	Peptid 5 - standard	-0.055	4.109	-1.13697	0.65	0.35	0	0.3	0.85	0.85	Day A
4	G08	0.052	0.0198313	-0.796768	1916_NK	NHS	11	101	120	Peptid 11 - standard	1.625	3.75	-1.08923	0.5	0.5	0	0.45	1	1	Day A
4	G09	0.17	0.178727	-0.632609	1916_NK	NHS	17	161	180	Peptid 17 - standard	0.62	10.518	2.81369	0	0.55	0.45	0.7	0.8	0.8	Day A
4	G10	0.045	0.0104053	-0.82032	1916_NK	NHS	23	221	240	Peptid 23 - standard	1.925	7.352	0.0246369	0	0.65	0.35	0.95	1	1	Day A
4	G11	0.048	0.014445	-0.809066	1916_NK	NHS	29	281	300	Peptid 29 - standard	-0.36	8.545	0.864581	0.9	0.1	0	0.05	0.75	0.75	Day A
4	G12	0.046	0.0117519	-0.816303	1916_NK	NHS	31	301	320	Peptid 31 - alternative	0.845	7.249	-0.0230898	0	1	0	1	0.95	0.95	Day A
4	H01	0.068	0.0413764	-0.761054	216_SSC	Patient	6	51	70	Peptid 6 - standard	1.495	6.332	-0.090825	0.15	0.85	0	0.8	0.9	0.9	Day A
4	H02	0.068	0.0413764	-0.761054	216_SSC	Patient	12	111	130	Peptid 12 - standard	1.155	6.161	-0.138536	0.75	0.25	0	0	1	1	Day A
4	H03	0.166	0.17334	-0.636694	216_SSC	Patient	18	171	190	Peptid 18 - standard	2.07	3.75	-1.18468	0.05	0.95	0	0.9	1	1	Day A
4	H04	0.181	0.193539	-0.621539	216_SSC	Patient	24	231	250	Peptid 24 - standard	0.505	10.134	3.02459	0	0.15	0.85	0.45	0.8	0.8	Day A
4	H05	0.082	0.0602284	-0.737506	216_SSC	Patient	30	291	310	Peptid 30 - standard	-0.43	9.299	1.0755	0.4	0.6	0	0.55	0.75	0.75	Day A
4	H06	0.068	0.0413764	-0.761054	216_SSC	Patient	36	351	370	Peptid 36 - standard	-1.26667	4.426	-1.08768	0	0	1	0	0	0	Day A
4	H07	0.046	0.0117519	-0.816303	1916_NK	NHS	6	51	70	Peptid 6 - standard	1.495	6.332	-0.090825	0.15	0.85	0	0.8	0.9	0.9	Day A
4	H08	0.049	0.0157916	-0.80576	1916_NK	NHS	12	111	130	Peptid 12 - standard	1.155	6.161	-0.138536	0.75	0.25	0	0	1	1	Day A
4	H09	0.057	0.0265642	-0.783933	1916_NK	NHS	18	171	190	Peptid 18 - standard	2.07	3.75	-1.18468	0.05	0.95	0	0.9	1	1	Day A
4	H10	0.107	0.0938927	-0.702876	1916_NK	NHS	24	231	250	Peptid 24 - standard	0.505	10.134	3.02459	0	0.15	0.85	0.45	0.8	0.8	Day A
4	H11	0.047	0.0130985	-0.812568	1916_NK	NHS	30	291	310	Peptid 30 - standard	-0.43	9.299	1.0755	0.4	0.6	0	0.55	0.75	0.75	Day A
4	H12	0.052	0.0198313	-0.796768	1916_NK	NHS	36	351	370	Peptid 36 - standard	-1.26667	4.426	-1.08768	0	0	1	0	0	0	Day A
5	A01	0.04	0.00594764	-0.836728	411_NK_SSC	NHS	7	61	80	Peptid 7 - alternative	2.035	6.1	-0.0908091	0	1	0	0.95	0.95	0.95	Day A
5	A02	0.056	0.0268833	-0.783374	411_NK_SSC	NHS	7	61	80	Peptid 7 - standard	2.035	6.1	-0.0908091	0	1	0	0.95	0.95	0.95	Day A
5	A03	0.056	0.0268833	-0.783374	411_NK_SSC	NHS	13	121	140	Peptid 13 - standard	1.06	8.523	0.858299	0.25	0.75	0	0.5	0.75	0.75	Day A
5	A04	0.079	0.0569784	-0.741273	411_NK_SSC	NHS	19	181	200	Peptid 19 - standard	0.31	5.361	-1.7534	0.55	0.45	0	0.4	0.7	0.7	Day A
5	A05	0.708	0.880012	-0.113333	411_NK_SSC	NHS	25	241	260	Peptid 25 - standard	0.845	13.102	4.90911	0	0.25	0.75	0.4	0.7	0.7	Day A
5	A06	0.087	0.0674462	-0.729468	411_NK_SSC	NHS	31	301	320	Peptid 31 - standard	0.845	7.249	-0.0230898	0	1	0	1	0.95	0.95	Day A
5	A07	0.146	0.144647	-0.659106	202_SSC	Patient	7	61	80	Peptid 7 - alternative	2.035	6.1	-0.0908091	0	1	0	0.95	0.95	0.95	Day A
5	A08	0.208	0.225772	-0.598108	202_SSC	Patient	7	61	80	Peptid 7 - standard	2.035	6.1	-0.0908091	0	1	0	0.95	0.95	0.95	Day A
5	A09	0.167	0.172125	-0.63762	202_SSC	Patient	13	121	140	Peptid 13 - standard	1.06	8.523	0.858299	0.25	0.75	0	0.5	0.75	0.75	Day A
5	A10	0.292	0.335685	-0.521893	202_SSC	Patient	19	181	200	Peptid 19 - standard	0.31	5.361	-1.7534	0.55	0.45	0	0.4	0.7	0.7	Day A
5	A11	0.727	0.904873	-0.0908761	202_SSC	Patient	25	241	260	Peptid 25 - standard	0.845	13.102	4.90911	0	0.25	0.75	0.4	0.7	0.7	Day A
5	A12	0.123	0.114551	-0.684217	202_SSC	Patient	31	301	320	Peptid 31 - standard	0.845	7.249	-0.0230898	0	1	0	1	0.95	0.95	Day A
5	B01	0.265	0.300356	-0.54603	411_NK_SSC	NHS	NA	NA	NA	Positive Control	NA	6.1	-0.0908091	NA	NA	NA	NA	NA	NA	Day A
5	B02	0.064	0.0373512	-0.766758	411_NK_SSC	NHS	11	101	120	Peptid 11 - standard	1.625	3.75	-1.08923	0.5	0.5	0	0.45	1	1	Day A
5	B03	0.053	0.0229579	-0.790536	411_NK_SSC	NHS	14	131	150	Peptid 14 - standard	0.895	6.155	-0.140134	0	0.85	0.15	1	0.75	0.75	Day A
5	B04	0.089	0.0700632	-0.726653	411_NK_SSC	NHS	20	191	210	Peptid 20 - standard	-1.13	6.782	-0.637957	1	0	0	0	0.7	0.7	Day A
5	B05	0.095	0.077914	-0.71848	411_NK_SSC	NHS	26	251	270	Peptid 26 - standard	1.85	10.526	1.86143	0	0.75	0.25	0.9	0.9	0.9	Day A
5	B06	0.179	0.187826	-0.625782	411_NK_SSC	NHS	32	311	330	Peptid 32 - standard	0.5	8.798	1.81212	0	0.55	0.45	0.8	0.7	0.7	Day A
5	B07	0.627	0.774025	-0.203917	202_SSC	Patient	NA	NA	NA	Positive Control	NA	6.1	-0.0908091	NA	NA	NA	NA	NA	NA	Day A
5	B08	0.212	0.231006	-0.594372	202_SSC	Patient	11	101	120	Peptid 11 - standard	1.625	3.75	-1.08923	0.5	0.5	0	0.45	1	1	Day A
5	B09	0.174	0.181284	-0.630682	202_SSC	Patient	14	131	150	Peptid 14 - standard	0.895	6.155	-0.140134	0	0.85	0.15	1	0.75	0.75	Day A
5	B10	0.213	0.232315	-0.59344	202_SSC	Patient	20	191	210	Peptid 20 - standard	-1.13	6.782	-0.637957	1	0	0	0	0.7	0.7	Day A
5	B11	0.194	0.207454	-0.611326	202_SSC	Patient	26	251	270	Peptid 26 - standard	1.85	10.526	1.86143	0	0.75	0.25	0.9	0.9	0.9	Day A
5	B12	0.321	0.373631	-0.496092	202_SSC	Patient	32	311	330	Peptid 32 - standard	0.5	8.798	1.81212	0	0.55	0.45	0.8	0.7	0.7	Day A
5	C01	0.043	0.00987308	-0.821999	411_NK_SSC	NHS	1	1	20	Peptid 1 - standard	0.715	3.737	-3.91814	1	0	0	0	0.85	0.85	Day A
5	C02	0.103	0.0883819	-0.708122	411_NK_SSC	NHS	12	111	130	Peptid 12 - alternative	1.155	6.161	-0.138536	0.75	0.25	0	0	1	1	Day A
5	C03	0.049	0.017724	-0.801305	411_NK_SSC	NHS	15	141	160	Peptid 15 - alternative	0.75	7.353	0.0262035	0	0.35	0.65	0.65	0.95	0.95	Day A
5	C04	0.247	0.276803	-0.562258	411_NK_SSC	NHS	21	201	220	Peptid 21 - standard	-0.2	9.501	2.02619	0.6	0.4	0	0.25	1	1	Day A
5	C05	0.112	0.100158	-0.697062	411_NK_SSC	NHS	27	261	280	Peptid 27 - standard	1.92	5.29	-0.972198	0.15	0.85	0	0.85	1	1	Day A
5	C06	0.486	0.58953	-0.345734	411_NK_SSC	NHS	33	321	340	Peptid 33 - standard	0.25	11.38	2.86142	0	0.05	0.95	0.3	0.65	0.65	Day A
5	C07	0.108	0.0949243	-0.701909	202_SSC	Patient	1	1	20	Peptid 1 - standard	0.715	3.737	-3.91814	1	0	0	0	0.85	0.85	Day A
5	C08	0.189	0.200911	-0.616107	202_SSC	Patient	12	111	130	Peptid 12 - alternative	1.155	6.161	-0.138536	0.75	0.25	0	0	1	1	Day A
5	C09	0.318	0.369705	-0.498759	202_SSC	Patient	15	141	160	Peptid 15 - alternative	0.75	7.353	0.0262035	0	0.35	0.65	0.65	0.95	0.95	Day A
5	C10	0.434	0.521489	-0.394331	202_SSC	Patient	21	201	220	Peptid 21 - standard	-0.2	9.501	2.02619	0.6	0.4	0	0.25	1	1	Day A
5	C11	0.191	0.203528	-0.61419	202_SSC	Patient	27	261	280	Peptid 27 - standard	1.92	5.29	-0.972198	0.15	0.85	0	0.85	1	1	Day A
5	C12	0.422	0.505787	-0.405342	202_SSC	Patient	33	321	340	Peptid 33 - standard	0.25	11.38	2.86142	0	0.05	0.95	0.3	0.65	0.65	Day A
5	D01	0.039	0.00463916	-0.843094	411_NK_SSC	NHS	2	11	30	Peptid 2 - standard	-0.13	3.295	-4.08764	1	0	0	0	0.65	0.65	Day A
5	D02	0.452	0.545041	-0.377681	411_NK_SSC	NHS	8	71	90	Peptid 8 - standard	0.305	10.398	0.910742	0	0.55	0.45	0.6	0.9	0.9	Day A
5	D03	0.103	0.0883819	-0.708122	411_NK_SSC	NHS	16	151	170	Peptid 16 - alternative	-0.105	12.204	3.0739	0	0.05	0.95	0.35	0.75	0.75	Day A
5	D04	0.05	0.0190324	-0.798453	411_NK_SSC	NHS	17	161	180	Peptid 17 - alternative	0.62	10.518	2.81369	0	0.55	0.45	0.7	0.8	0.8	Day A
5	D05	0.071	0.0465105	-0.754184	411_NK_SSC	NHS	28	271	290	Peptid 28 - standard	1.21	5.406	-0.970632	0.65	0.35	0	0.35	0.95	0.95	Day A
5	D06	0.683	0.8473	-0.142146	411_NK_SSC	NHS	34	331	350	Peptid 34 - standard	-0.485	12.199	2.86142	0	0	1	0	0.45	0.45	Day A
5	D07	0.155	0.156423	-0.649761	202_SSC	Patient	2	11	30	Peptid 2 - standard	-0.13	3.295	-4.08764	1	0	0	0	0.65	0.65	Day A
5	D08	0.193	0.206145	-0.612279	202_SSC	Patient	8	71	90	Peptid 8 - standard	0.305	10.398	0.910742	0	0.55	0.45	0.6	0.9	0.9	Day A
5	D09	0.464	0.560743	-0.366484	202_SSC	Patient	16	151	170	Peptid 16 - alternative	-0.105	12.204	3.0739	0	0.05	0.95	0.35	0.75	0.75	Day A
5	D10	0.247	0.276803	-0.562258	202_SSC	Patient	17	161	180	Peptid 17 - alternative	0.62	10.518	2.81369	0	0.55	0.45	0.7	0.8	0.8	Day A
5	D11	0.172	0.178667	-0.632654	202_SSC	Patient	28	271	290	Peptid 28 - standard	1.21	5.406	-0.970632	0.65	0.35	0	0.35	0.95	0.95	Day A
5	D12	0.689	0.855151	-0.135305	202_SSC	Patient	34	331	350	Peptid 34 - standard	-0.485	12.199	2.86142	0	0	1	0	0.45	0.45	Day A
5	E01	0.054	0.0242664	-0.788076	411_NK_SSC	NHS	3	21	40	Peptid 3 - standard	-1.26	3.226	-5.18152	1	0	0	0	0.45	0.45	Day A
5	E02	0.066	0.0399681	-0.763015	411_NK_SSC	NHS	9	81	100	Peptid 9 - standard	0.2	7.552	0.0786615	0	0.55	0.45	0.65	0.9	0.9	Day A
5	E03	0.06	0.0321172	-0.774692	411_NK_SSC	NHS	15	141	160	Peptid 15 - standard	0.75	7.353	0.0262035	0	0.35	0.65	0.65	0.95	0.95	Day A
5	E04	0.045	0.01249	-0.814224	411_NK_SSC	NHS	23	221	240	Peptid 23 - alternative	1.925	7.352	0.0246369	0	0.65	0.35	0.95	1	1	Day A
5	E05	0.211	0.229698	-0.595304	411_NK_SSC	NHS	24	231	250	Peptid 24 - alternative	0.505	10.134	3.02459	0	0.15	0.85	0.45	0.8	0.8	Day A
5	E06	0.13	0.123711	-0.676355	411_NK_SSC	NHS	35	341	360	Peptid 35 - standard	-2.005	12.023	1.91229	0	0	1	0	0	0	Day A
5	E07	0.202	0.217921	-0.603744	202_SSC	Patient	3	21	40	Peptid 3 - standard	-1.26	3.226	-5.18152	1	0	0	0	0.45	0.45	Day A
5	E08	0.22	0.241474	-0.586946	202_SSC	Patient	9	81	100	Peptid 9 - standard	0.2	7.552	0.0786615	0	0.55	0.45	0.65	0.9	0.9	Day A
5	E09	0.378	0.448214	-0.44521	202_SSC	Patient	15	141	160	Peptid 15 - standard	0.75	7.353	0.0262035	0	0.35	0.65	0.65	0.95	0.95	Day A
5	E10	0.186	0.196986	-0.618993	202_SSC	Patient	23	221	240	Peptid 23 - alternative	1.925	7.352	0.0246369	0	0.65	0.35	0.95	1	1	Day A
5	E11	0.317	0.368397	-0.499649	202_SSC	Patient	24	231	250	Peptid 24 - alternative	0.505	10.134	3.02459	0	0.15	0.85	0.45	0.8	0.8	Day A
5	E12	0.271	0.308207	-0.540649	202_SSC	Patient	35	341	360	Peptid 35 - standard	-2.005	12.023	1.91229	0	0	1	0	0	0	Day A
5	F01	0.062	0.0347342	-0.770644	411_NK_SSC	NHS	4	31	50	Peptid 4 - standard	-0.955	3.295	-4.22766	1	0	0	0	0.7	0.7	Day A
5	F02	0.153	0.153806	-0.651818	411_NK_SSC	NHS	10	91	110	Peptid 10 - standard	1.82	5.292	-0.922889	0	1	0	0.95	1	1	Day A
5	F03	0.093	0.0752971	-0.721162	411_NK_SSC	NHS	16	151	170	Peptid 16 - standard	-0.105	12.204	3.0739	0	0.05	0.95	0.35	0.75	0.75	Day A
5	F04	0.05	0.0190324	-0.798453	411_NK_SSC	NHS	22	211	230	Peptid 22 - standard	1.5	12.5	1.90916	0.1	0.9	0	0.75	1	1	Day A
5	F05	0.092	0.0739886	-0.722519	411_NK_SSC	NHS	26	251	270	Peptid 26 - alternative	1.85	10.526	1.86143	0	0.75	0.25	0.9	0.9	0.9	Day A
5	F06	0.078	0.0556699	-0.742819	411_NK_SSC	NHS	NK	NA	NA	Negative Control	NA	6.1	-0.0908091	NA	NA	NA	NA	NA	NA	Day A
5	F07	0.144	0.14203	-0.661214	202_SSC	Patient	4	31	50	Peptid 4 - standard	-0.955	3.295	-4.22766	1	0	0	0	0.7	0.7	Day A
5	F08	0.176	0.183901	-0.628716	202_SSC	Patient	10	91	110	Peptid 10 - standard	1.82	5.292	-0.922889	0	1	0	0.95	1	1	Day A
5	F09	0.445	0.535882	-0.384176	202_SSC	Patient	16	151	170	Peptid 16 - standard	-0.105	12.204	3.0739	0	0.05	0.95	0.35	0.75	0.75	Day A
5	F10	0.228	0.251942	-0.579577	202_SSC	Patient	22	211	230	Peptid 22 - standard	1.5	12.5	1.90916	0.1	0.9	0	0.75	1	1	Day A
5	F11	0.179	0.187826	-0.625782	202_SSC	Patient	26	251	270	Peptid 26 - alternative	1.85	10.526	1.86143	0	0.75	0.25	0.9	0.9	0.9	Day A
5	F12	0.164	0.168199	-0.640625	202_SSC	Patient	NK	NA	NA	Negative Control	NA	6.1	-0.0908091	NA	NA	NA	NA	NA	NA	Day A
5	G01	0.045	0.01249	-0.814224	411_NK_SSC	NHS	5	41	60	Peptid 5 - standard	-0.055	4.109	-1.13697	0.65	0.35	0	0.3	0.85	0.85	Day A
5	G02	0.092	0.0739886	-0.722519	411_NK_SSC	NHS	11	101	120	Peptid 11 - standard	1.625	3.75	-1.08923	0.5	0.5	0	0.45	1	1	Day A
5	G03	0.247	0.276803	-0.562258	411_NK_SSC	NHS	17	161	180	Peptid 17 - standard	0.62	10.518	2.81369	0	0.55	0.45	0.7	0.8	0.8	Day A
5	G04	0.049	0.017724	-0.801305	411_NK_SSC	NHS	23	221	240	Peptid 23 - standard	1.925	7.352	0.0246369	0	0.65	0.35	0.95	1	1	Day A
5	G05	0.11	0.0975412	-0.699472	411_NK_SSC	NHS	29	281	300	Peptid 29 - standard	-0.36	8.545	0.864581	0.9	0.1	0	0.05	0.75	0.75	Day A
5	G06	0.087	0.0674462	-0.729468	411_NK_SSC	NHS	31	301	320	Peptid 31 - alternative	0.845	7.249	-0.0230898	0	1	0	1	0.95	0.95	Day A
5	G07	0.134	0.128945	-0.671956	202_SSC	Patient	5	41	60	Peptid 5 - standard	-0.055	4.109	-1.13697	0.65	0.35	0	0.3	0.85	0.85	Day A
5	G08	0.185	0.195677	-0.619958	202_SSC	Patient	11	101	120	Peptid 11 - standard	1.625	3.75	-1.08923	0.5	0.5	0	0.45	1	1	Day A
5	G09	0.384	0.456065	-0.439814	202_SSC	Patient	17	161	180	Peptid 17 - standard	0.62	10.518	2.81369	0	0.55	0.45	0.7	0.8	0.8	Day A
5	G10	0.24	0.267644	-0.568612	202_SSC	Patient	23	221	240	Peptid 23 - standard	1.925	7.352	0.0246369	0	0.65	0.35	0.95	1	1	Day A
5	G11	0.218	0.238857	-0.588797	202_SSC	Patient	29	281	300	Peptid 29 - standard	-0.36	8.545	0.864581	0.9	0.1	0	0.05	0.75	0.75	Day A
5	G12	0.214	0.233623	-0.59251	202_SSC	Patient	31	301	320	Peptid 31 - alternative	0.845	7.249	-0.0230898	0	1	0	1	0.95	0.95	Day A
5	H01	0.116	0.105392	-0.692314	411_NK_SSC	NHS	6	51	70	Peptid 6 - standard	1.495	6.332	-0.090825	0.15	0.85	0	0.8	0.9	0.9	Day A
5	H02	0.081	0.0595953	-0.738232	411_NK_SSC	NHS	12	111	130	Peptid 12 - standard	1.155	6.161	-0.138536	0.75	0.25	0	0	1	1	Day A
5	H03	0.048	0.0164155	-0.804287	411_NK_SSC	NHS	18	171	190	Peptid 18 - standard	2.07	3.75	-1.18468	0.05	0.95	0	0.9	1	1	Day A
5	H04	0.269	0.30559	-0.542441	411_NK_SSC	NHS	24	231	250	Peptid 24 - standard	0.505	10.134	3.02459	0	0.15	0.85	0.45	0.8	0.8	Day A
5	H05	0.12	0.110626	-0.687656	411_NK_SSC	NHS	30	291	310	Peptid 30 - standard	-0.43	9.299	1.0755	0.4	0.6	0	0.55	0.75	0.75	Day A
5	H06	0.084	0.0635208	-0.733787	411_NK_SSC	NHS	36	351	370	Peptid 36 - standard	-1.26667	4.426	-1.08768	0	0	1	0	0	0	Day A
5	H07	0.155	0.156423	-0.649761	202_SSC	Patient	6	51	70	Peptid 6 - standard	1.495	6.332	-0.090825	0.15	0.85	0	0.8	0.9	0.9	Day A
5	H08	0.217	0.237549	-0.589724	202_SSC	Patient	12	111	130	Peptid 12 - standard	1.155	6.161	-0.138536	0.75	0.25	0	0	1	1	Day A
5	H09	0.135	0.130253	-0.670866	202_SSC	Patient	18	171	190	Peptid 18 - standard	2.07	3.75	-1.18468	0.05	0.95	0	0.9	1	1	Day A
5	H10	0.506	0.615699	-0.326598	202_SSC	Patient	24	231	250	Peptid 24 - standard	0.505	10.134	3.02459	0	0.15	0.85	0.45	0.8	0.8	Day A
5	H11	0.258	0.291196	-0.552324	202_SSC	Patient	30	291	310	Peptid 30 - standard	-0.43	9.299	1.0755	0.4	0.6	0	0.55	0.75	0.75	Day A
5	H12	0.204	0.220538	-0.601861	202_SSC	Patient	36	351	370	Peptid 36 - standard	-1.26667	4.426	-1.08768	0	0	1	0	0	0	Day A
6	A01	0.101	0.0289876	-0.779779	335_SSC	Patient	7	61	80	Peptid 7 - alternative	2.035	6.1	-0.0908091	0	1	0	0.95	0.95	0.95	Day A
6	A02	0.118	0.0514801	-0.747892	335_SSC	Patient	7	61	80	Peptid 7 - standard	2.035	6.1	-0.0908091	0	1	0	0.95	0.95	0.95	Day A
6	A03	0.108	0.0382492	-0.765458	335_SSC	Patient	13	121	140	Peptid 13 - standard	1.06	8.523	0.858299	0.25	0.75	0	0.5	0.75	0.75	Day A
6	A04	0.111	0.0422185	-0.759898	335_SSC	Patient	19	181	200	Peptid 19 - standard	0.31	5.361	-1.7534	0.55	0.45	0	0.4	0.7	0.7	Day A
6	A05	0.523	0.58733	-0.34733	335_SSC	Patient	25	241	260	Peptid 25 - standard	0.845	13.102	4.90911	0	0.25	0.75	0.4	0.7	0.7	Day A
6	A06	0.146	0.0885264	-0.707983	335_SSC	Patient	31	301	320	Peptid 31 - standard	0.845	7.249	-0.0230898	0	1	0	1	0.95	0.95	Day A
6	A07	0.114	0.0461877	-0.754604	215_SSC	Patient	7	61	80	Peptid 7 - alternative	2.035	6.1	-0.0908091	0	1	0	0.95	0.95	0.95	Day A
6	A08	0.187	0.142773	-0.660614	215_SSC	Patient	7	61	80	Peptid 7 - standard	2.035	6.1	-0.0908091	0	1	0	0.95	0.95	0.95	Day A
6	A09	0.475	0.523822	-0.39269	215_SSC	Patient	13	121	140	Peptid 13 - standard	1.06	8.523	0.858299	0.25	0.75	0	0.5	0.75	0.75	Day A
6	A10	0.146	0.0885264	-0.707983	215_SSC	Patient	19	181	200	Peptid 19 - standard	0.31	5.361	-1.7534	0.55	0.45	0	0.4	0.7	0.7	Day A
6	A11	0.589	0.674653	-0.282412	215_SSC	Patient	25	241	260	Peptid 25 - standard	0.845	13.102	4.90911	0	0.25	0.75	0.4	0.7	0.7	Day A
6	A12	0.18	0.133511	-0.668168	215_SSC	Patient	31	301	320	Peptid 31 - standard	0.845	7.249	-0.0230898	0	1	0	1	0.95	0.95	Day A
6	B01	0.667	0.777854	-0.200778	335_SSC	Patient	NA	NA	NA	Positive Control	NA	6.1	-0.0908091	NA	NA	NA	NA	NA	NA	Day A
6	B02	0.156	0.101757	-0.695601	335_SSC	Patient	11	101	120	Peptid 11 - standard	1.625	3.75	-1.08923	0.5	0.5	0	0.45	1	1	Day A
6	B03	0.104	0.0329569	-0.773374	335_SSC	Patient	14	131	150	Peptid 14 - standard	0.895	6.155	-0.140134	0	0.85	0.15	1	0.75	0.75	Day A
6	B04	0.129	0.066034	-0.731008	335_SSC	Patient	20	191	210	Peptid 20 - standard	-1.13	6.782	-0.637957	1	0	0	0	0.7	0.7	Day A
6	B05	0.134	0.0726494	-0.723918	335_SSC	Patient	26	251	270	Peptid 26 - standard	1.85	10.526	1.86143	0	0.75	0.25	0.9	0.9	0.9	Day A
6	B06	0.162	0.109696	-0.688478	335_SSC	Patient	32	311	330	Peptid 32 - standard	0.5	8.798	1.81212	0	0.55	0.45	0.8	0.7	0.7	Day A
6	B07	0.677	0.791085	-0.189857	215_SSC	Patient	NA	NA	NA	Positive Control	NA	6.1	-0.0908091	NA	NA	NA	NA	NA	NA	Day A
6	B08	0.212	0.17585	-0.634786	215_SSC	Patient	11	101	120	Peptid 11 - standard	1.625	3.75	-1.08923	0.5	0.5	0	0.45	1	1	Day A
6	B09	0.167	0.116311	-0.682689	215_SSC	Patient	14	131	150	Peptid 14 - standard	0.895	6.155	-0.140134	0	0.85	0.15	1	0.75	0.75	Day A
6	B10	0.2	0.159973	-0.646986	215_SSC	Patient	20	191	210	Peptid 20 - standard	-1.13	6.782	-0.637957	1	0	0	0	0.7	0.7	Day A
6	B11	0.205	0.166588	-0.641863	215_SSC	Patient	26	251	270	Peptid 26 - standard	1.85	10.526	1.86143	0	0.75	0.25	0.9	0.9	0.9	Day A
6	B12	0.253	0.230097	-0.59502	215_SSC	Patient	32	311	330	Peptid 32 - standard	0.5	8.798	1.81212	0	0.55	0.45	0.8	0.7	0.7	Day A
6	C01	0.103	0.0316338	-0.775459	335_SSC	Patient	1	1	20	Peptid 1 - standard	0.715	3.737	-3.91814	1	0	0	0	0.85	0.85	Day A
6	C02	0.113	0.0448646	-0.756342	335_SSC	Patient	12	111	130	Peptid 12 - alternative	1.155	6.161	-0.138536	0.75	0.25	0	0	1	1	Day A
6	C03	0.135	0.0739725	-0.722535	335_SSC	Patient	15	141	160	Peptid 15 - alternative	0.75	7.353	0.0262035	0	0.35	0.65	0.65	0.95	0.95	Day A
6	C04	0.207	0.169235	-0.63983	335_SSC	Patient	21	201	220	Peptid 21 - standard	-0.2	9.501	2.02619	0.6	0.4	0	0.25	1	1	Day A
6	C05	0.13	0.0673571	-0.729565	335_SSC	Patient	27	261	280	Peptid 27 - standard	1.92	5.29	-0.972198	0.15	0.85	0	0.85	1	1	Day A
6	C06	0.34	0.345205	-0.515414	335_SSC	Patient	33	321	340	Peptid 33 - standard	0.25	11.38	2.86142	0	0.05	0.95	0.3	0.65	0.65	Day A
6	C07	0.108	0.0382492	-0.765458	215_SSC	Patient	1	1	20	Peptid 1 - standard	0.715	3.737	-3.91814	1	0	0	0	0.85	0.85	Day A
6	C08	0.146	0.0885264	-0.707983	215_SSC	Patient	12	111	130	Peptid 12 - alternative	1.155	6.161	-0.138536	0.75	0.25	0	0	1	1	Day A
6	C09	0.183	0.137481	-0.66491	215_SSC	Patient	15	141	160	Peptid 15 - alternative	0.75	7.353	0.0262035	0	0.35	0.65	0.65	0.95	0.95	Day A
6	C10	0.285	0.272435	-0.565284	215_SSC	Patient	21	201	220	Peptid 21 - standard	-0.2	9.501	2.02619	0.6	0.4	0	0.25	1	1	Day A
6	C11	0.132	0.0700032	-0.726717	215_SSC	Patient	27	261	280	Peptid 27 - standard	1.92	5.29	-0.972198	0.15	0.85	0	0.85	1	1	Day A
6	C12	0.423	0.455021	-0.440532	215_SSC	Patient	33	321	340	Peptid 33 - standard	0.25	11.38	2.86142	0	0.05	0.95	0.3	0.65	0.65	Day A
6	D01	0.112	0.0435415	-0.758106	335_SSC	Patient	2	11	30	Peptid 2 - standard	-0.13	3.295	-4.08764	1	0	0	0	0.65	0.65	Day A
6	D02	0.096	0.0223722	-0.791664	335_SSC	Patient	8	71	90	Peptid 8 - standard	0.305	10.398	0.910742	0	0.55	0.45	0.6	0.9	0.9	Day A
6	D03	0.247	0.222158	-0.600697	335_SSC	Patient	16	151	170	Peptid 16 - alternative	-0.105	12.204	3.0739	0	0.05	0.95	0.35	0.75	0.75	Day A
6	D04	0.157	0.10308	-0.6944	335_SSC	Patient	17	161	180	Peptid 17 - alternative	0.62	10.518	2.81369	0	0.55	0.45	0.7	0.8	0.8	Day A
6	D05	0.132	0.0700032	-0.726717	335_SSC	Patient	28	271	290	Peptid 28 - standard	1.21	5.406	-0.970632	0.65	0.35	0	0.35	0.95	0.95	Day A
6	D06	0.666	0.776531	-0.201864	335_SSC	Patient	34	331	350	Peptid 34 - standard	-0.485	12.199	2.86142	0	0	1	0	0.45	0.45	Day A
6	D07	0.123	0.0580955	-0.739967	215_SSC	Patient	2	11	30	Peptid 2 - standard	-0.13	3.295	-4.08764	1	0	0	0	0.65	0.65	Day A
6	D08	0.182	0.136158	-0.665992	215_SSC	Patient	8	71	90	Peptid 8 - standard	0.305	10.398	0.910742	0	0.55	0.45	0.6	0.9	0.9	Day A
6	D09	0.487	0.539699	-0.381473	215_SSC	Patient	16	151	170	Peptid 16 - alternative	-0.105	12.204	3.0739	0	0.05	0.95	0.35	0.75	0.75	Day A
6	D10	0.2	0.159973	-0.646986	215_SSC	Patient	17	161	180	Peptid 17 - alternative	0.62	10.518	2.81369	0	0.55	0.45	0.7	0.8	0.8	Day A
6	D11	0.132	0.0700032	-0.726717	215_SSC	Patient	28	271	290	Peptid 28 - standard	1.21	5.406	-0.970632	0.65	0.35	0	0.35	0.95	0.95	Day A
6	D12	0.716	0.842685	-0.146147	215_SSC	Patient	34	331	350	Peptid 34 - standard	-0.485	12.199	2.86142	0	0	1	0	0.45	0.45	Day A
6	E01	0.116	0.0488339	-0.751202	335_SSC	Patient	3	21	40	Peptid 3 - standard	-1.26	3.226	-5.18152	1	0	0	0	0.45	0.45	Day A
6	E02	0.159	0.105727	-0.692014	335_SSC	Patient	9	81	100	Peptid 9 - standard	0.2	7.552	0.0786615	0	0.55	0.45	0.65	0.9	0.9	Day A
6	E03	0.165	0.113665	-0.68499	335_SSC	Patient	15	141	160	Peptid 15 - standard	0.75	7.353	0.0262035	0	0.35	0.65	0.65	0.95	0.95	Day A
6	E04	0.096	0.0223722	-0.791664	335_SSC	Patient	23	221	240	Peptid 23 - alternative	1.925	7.352	0.0246369	0	0.65	0.35	0.95	1	1	Day A
6	E05	0.105	0.0342799	-0.771334	335_SSC	Patient	24	231	250	Peptid 24 - alternative	0.505	10.134	3.02459	0	0.15	0.85	0.45	0.8	0.8	Day A
6	E06	0.116	0.0488339	-0.751202	335_SSC	Patient	35	341	360	Peptid 35 - standard	-2.005	12.023	1.91229	0	0	1	0	0	0	Day A
6	E07	0.125	0.0607417	-0.73692	215_SSC	Patient	3	21	40	Peptid 3 - standard	-1.26	3.226	-5.18152	1	0	0	0	0.45	0.45	Day A
6	E08	0.309	0.304189	-0.543401	215_SSC	Patient	9	81	100	Peptid 9 - standard	0.2	7.552	0.0786615	0	0.55	0.45	0.65	0.9	0.9	Day A
6	E09	0.261	0.240681	-0.587507	215_SSC	Patient	15	141	160	Peptid 15 - standard	0.75	7.353	0.0262035	0	0.35	0.65	0.65	0.95	0.95	Day A
6	E10	0.114	0.0461877	-0.754604	215_SSC	Patient	23	221	240	Peptid 23 - alternative	1.925	7.352	0.0246369	0	0.65	0.35	0.95	1	1	Day A
6	E11	0.107	0.0369261	-0.767379	215_SSC	Patient	24	231	250	Peptid 24 - alternative	0.505	10.134	3.02459	0	0.15	0.85	0.45	0.8	0.8	Day A
6	E12	0.228	0.197019	-0.618968	215_SSC	Patient	35	341	360	Peptid 35 - standard	-2.005	12.023	1.91229	0	0	1	0	0	0	Day A
6	F01	0.107	0.0369261	-0.767379	335_SSC	Patient	4	31	50	Peptid 4 - standard	-0.955	3.295	-4.22766	1	0	0	0	0.7	0.7	Day A
6	F02	0.105	0.0342799	-0.771334	335_SSC	Patient	10	91	110	Peptid 10 - standard	1.82	5.292	-0.922889	0	1	0	0.95	1	1	Day A
6	F03	0.163	0.111019	-0.68731	335_SSC	Patient	16	151	170	Peptid 16 - standard	-0.105	12.204	3.0739	0	0.05	0.95	0.35	0.75	0.75	Day A
6	F04	0.114	0.0461877	-0.754604	335_SSC	Patient	22	211	230	Peptid 22 - standard	1.5	12.5	1.90916	0.1	0.9	0	0.75	1	1	Day A
6	F05	0.095	0.0210491	-0.794277	335_SSC	Patient	26	251	270	Peptid 26 - alternative	1.85	10.526	1.86143	0	0.75	0.25	0.9	0.9	0.9	Day A
6	F06	0.087	0.0104644	-0.820137	335_SSC	Patient	NK	NA	NA	Negative Control	NA	6.1	-0.0908091	NA	NA	NA	NA	NA	NA	Day A
6	F07	0.264	0.244651	-0.584705	215_SSC	Patient	4	31	50	Peptid 4 - standard	-0.955	3.295	-4.22766	1	0	0	0	0.7	0.7	Day A
6	F08	0.146	0.0885264	-0.707983	215_SSC	Patient	10	91	110	Peptid 10 - standard	1.82	5.292	-0.922889	0	1	0	0.95	1	1	Day A
6	F09	0.322	0.321389	-0.531638	215_SSC	Patient	16	151	170	Peptid 16 - standard	-0.105	12.204	3.0739	0	0.05	0.95	0.35	0.75	0.75	Day A
6	F10	0.183	0.137481	-0.66491	215_SSC	Patient	22	211	230	Peptid 22 - standard	1.5	12.5	1.90916	0.1	0.9	0	0.75	1	1	Day A
6	F11	0.109	0.0395723	-0.763572	215_SSC	Patient	26	251	270	Peptid 26 - alternative	1.85	10.526	1.86143	0	0.75	0.25	0.9	0.9	0.9	Day A
6	F12	0.11	0.0408954	-0.76172	215_SSC	Patient	NK	NA	NA	Negative Control	NA	6.1	-0.0908091	NA	NA	NA	NA	NA	NA	Day A
6	G01	0.128	0.0647109	-0.732465	335_SSC	Patient	5	41	60	Peptid 5 - standard	-0.055	4.109	-1.13697	0.65	0.35	0	0.3	0.85	0.85	Day A
6	G02	0.162	0.109696	-0.688478	335_SSC	Patient	11	101	120	Peptid 11 - standard	1.625	3.75	-1.08923	0.5	0.5	0	0.45	1	1	Day A
6	G03	0.421	0.452375	-0.442351	335_SSC	Patient	17	161	180	Peptid 17 - standard	0.62	10.518	2.81369	0	0.55	0.45	0.7	0.8	0.8	Day A
6	G04	0.164	0.112342	-0.686147	335_SSC	Patient	23	221	240	Peptid 23 - standard	1.925	7.352	0.0246369	0	0.65	0.35	0.95	1	1	Day A
6	G05	0.116	0.0488339	-0.751202	335_SSC	Patient	29	281	300	Peptid 29 - standard	-0.36	8.545	0.864581	0.9	0.1	0	0.05	0.75	0.75	Day A
6	G06	0.155	0.100434	-0.696809	335_SSC	Patient	31	301	320	Peptid 31 - alternative	0.845	7.249	-0.0230898	0	1	0	1	0.95	0.95	Day A
6	G07	0.247	0.222158	-0.600697	215_SSC	Patient	5	41	60	Peptid 5 - standard	-0.055	4.109	-1.13697	0.65	0.35	0	0.3	0.85	0.85	Day A
6	G08	0.201	0.161296	-0.645957	215_SSC	Patient	11	101	120	Peptid 11 - standard	1.625	3.75	-1.08923	0.5	0.5	0	0.45	1	1	Day A
6	G09	0.759	0.899578	-0.0957016	215_SSC	Patient	17	161	180	Peptid 17 - standard	0.62	10.518	2.81369	0	0.55	0.45	0.7	0.8	0.8	Day A
6	G10	0.22	0.186435	-0.62682	215_SSC	Patient	23	221	240	Peptid 23 - standard	1.925	7.352	0.0246369	0	0.65	0.35	0.95	1	1	Day A
6	G11	0.106	0.035603	-0.769337	215_SSC	Patient	29	281	300	Peptid 29 - standard	-0.36	8.545	0.864581	0.9	0.1	0	0.05	0.75	0.75	Day A
6	G12	0.144	0.0858803	-0.710548	215_SSC	Patient	31	301	320	Peptid 31 - alternative	0.845	7.249	-0.0230898	0	1	0	1	0.95	0.95	Day A
6	H01	0.126	0.0620647	-0.73542	335_SSC	Patient	6	51	70	Peptid 6 - standard	1.495	6.332	-0.090825	0.15	0.85	0	0.8	0.9	0.9	Day A
6	H02	0.139	0.0792648	-0.717111	335_SSC	Patient	12	111	130	Peptid 12 - standard	1.155	6.161	-0.138536	0.75	0.25	0	0	1	1	Day A
6	H03	0.109	0.0395723	-0.763572	335_SSC	Patient	18	171	190	Peptid 18 - standard	2.07	3.75	-1.18468	0.05	0.95	0	0.9	1	1	Day A
6	H04	0.419	0.449729	-0.44417	335_SSC	Patient	24	231	250	Peptid 24 - standard	0.505	10.134	3.02459	0	0.15	0.85	0.45	0.8	0.8	Day A
6	H05	0.123	0.0580955	-0.739967	335_SSC	Patient	30	291	310	Peptid 30 - standard	-0.43	9.299	1.0755	0.4	0.6	0	0.55	0.75	0.75	Day A
6	H06	0.122	0.0567724	-0.741516	335_SSC	Patient	36	351	370	Peptid 36 - standard	-1.26667	4.426	-1.08768	0	0	1	0	0	0	Day A
6	H07	0.152	0.096465	-0.700471	215_SSC	Patient	6	51	70	Peptid 6 - standard	1.495	6.332	-0.090825	0.15	0.85	0	0.8	0.9	0.9	Day A
6	H08	0.187	0.142773	-0.660614	215_SSC	Patient	12	111	130	Peptid 12 - standard	1.155	6.161	-0.138536	0.75	0.25	0	0	1	1	Day A
6	H09	0.109	0.0395723	-0.763572	215_SSC	Patient	18	171	190	Peptid 18 - standard	2.07	3.75	-1.18468	0.05	0.95	0	0.9	1	1	Day A
6	H10	0.688	0.805639	-0.177713	215_SSC	Patient	24	231	250	Peptid 24 - standard	0.505	10.134	3.02459	0	0.15	0.85	0.45	0.8	0.8	Day A
6	H11	0.121	0.0554493	-0.743082	215_SSC	Patient	30	291	310	Peptid 30 - standard	-0.43	9.299	1.0755	0.4	0.6	0	0.55	0.75	0.75	Day A
6	H12	0.129	0.066034	-0.731008	215_SSC	Patient	36	351	370	Peptid 36 - standard	-1.26667	4.426	-1.08768	0	0	1	0	0	0	Day A
7	A01	0.058	0.0118779	-0.815942	69/16_NK	NHS	7	61	80	Peptid 7 - alternative	2.035	6.1	-0.0908091	0	1	0	0.95	0.95	0.95	Day B
7	A02	0.089	0.0462031	-0.754584	69/16_NK	NHS	7	61	80	Peptid 7 - standard	2.035	6.1	-0.0908091	0	1	0	0.95	0.95	0.95	Day B
7	A03	0.291	0.26987	-0.567065	69/16_NK	NHS	13	121	140	Peptid 13 - standard	1.06	8.523	0.858299	0.25	0.75	0	0.5	0.75	0.75	Day B
7	A04	0.059	0.0129852	-0.812872	69/16_NK	NHS	19	181	200	Peptid 19 - standard	0.31	5.361	-1.7534	0.55	0.45	0	0.4	0.7	0.7	Day B
7	A05	0.069	0.0240578	-0.788463	69/16_NK	NHS	25	241	260	Peptid 25 - standard	0.845	13.102	4.90911	0	0.25	0.75	0.4	0.7	0.7	Day B
7	A06	0.052	0.00523434	-0.840064	69/16_NK	NHS	31	301	320	Peptid 31 - standard	0.845	7.249	-0.0230898	0	1	0	1	0.95	0.95	Day B
7	A07	0.058	0.0118779	-0.815942	215_SSC	Patient	7	61	80	Peptid 7 - alternative	2.035	6.1	-0.0908091	0	1	0	0.95	0.95	0.95	Day B
7	A08	0.065	0.0196288	-0.797191	215_SSC	Patient	7	61	80	Peptid 7 - standard	2.035	6.1	-0.0908091	0	1	0	0.95	0.95	0.95	Day B
7	A09	0.443	0.438174	-0.452096	215_SSC	Patient	13	121	140	Peptid 13 - standard	1.06	8.523	0.858299	0.25	0.75	0	0.5	0.75	0.75	Day B
7	A10	0.073	0.0284869	-0.780621	215_SSC	Patient	19	181	200	Peptid 19 - standard	0.31	5.361	-1.7534	0.55	0.45	0	0.4	0.7	0.7	Day B
7	A11	0.068	0.0229506	-0.79055	215_SSC	Patient	25	241	260	Peptid 25 - standard	0.845	13.102	4.90911	0	0.25	0.75	0.4	0.7	0.7	Day B
7	A12	0.065	0.0196288	-0.797191	215_SSC	Patient	31	301	320	Peptid 31 - standard	0.845	7.249	-0.0230898	0	1	0	1	0.95	0.95	Day B
7	B01	0.076	0.0318087	-0.775181	69/16_NK	NHS	NA	NA	NA	Positive Control	NA	6.1	-0.0908091	NA	NA	NA	NA	NA	NA	Day B
7	B02	0.058	0.0118779	-0.815942	69/16_NK	NHS	11	101	120	Peptid 11 - standard	1.625	3.75	-1.08923	0.5	0.5	0	0.45	1	1	Day B
7	B03	0.186	0.153608	-0.651975	69/16_NK	NHS	14	131	150	Peptid 14 - standard	0.895	6.155	-0.140134	0	0.85	0.15	1	0.75	0.75	Day B
7	B04	0.538	0.543364	-0.378872	69/16_NK	NHS	20	191	210	Peptid 20 - standard	-1.13	6.782	-0.637957	1	0	0	0	0.7	0.7	Day B
7	B05	0.059	0.0129852	-0.812872	69/16_NK	NHS	26	251	270	Peptid 26 - standard	1.85	10.526	1.86143	0	0.75	0.25	0.9	0.9	0.9	Day B
7	B06	0.071	0.0262723	-0.784447	69/16_NK	NHS	32	311	330	Peptid 32 - standard	0.5	8.798	1.81212	0	0.55	0.45	0.8	0.7	0.7	Day B
7	B07	0.078	0.0340232	-0.771727	215_SSC	Patient	NA	NA	NA	Positive Control	NA	6.1	-0.0908091	NA	NA	NA	NA	NA	NA	Day B
7	B08	0.058	0.0118779	-0.815942	215_SSC	Patient	11	101	120	Peptid 11 - standard	1.625	3.75	-1.08923	0.5	0.5	0	0.45	1	1	Day B
7	B09	0.131	0.0927082	-0.703993	215_SSC	Patient	14	131	150	Peptid 14 - standard	0.895	6.155	-0.140134	0	0.85	0.15	1	0.75	0.75	Day B
7	B10	0.864	0.904332	-0.0913702	215_SSC	Patient	20	191	210	Peptid 20 - standard	-1.13	6.782	-0.637957	1	0	0	0	0.7	0.7	Day B
7	B11	0.122	0.0827428	-0.713633	215_SSC	Patient	26	251	270	Peptid 26 - standard	1.85	10.526	1.86143	0	0.75	0.25	0.9	0.9	0.9	Day B
7	B12	0.082	0.0384522	-0.765167	215_SSC	Patient	32	311	330	Peptid 32 - standard	0.5	8.798	1.81212	0	0.55	0.45	0.8	0.7	0.7	Day B
7	C01	0.064	0.0185215	-0.799552	69/16_NK	NHS	1	1	20	Peptid 1 - standard	0.715	3.737	-3.91814	1	0	0	0	0.85	0.85	Day B
7	C02	0.055	0.00855613	-0.826422	69/16_NK	NHS	12	111	130	Peptid 12 - alternative	1.155	6.161	-0.138536	0.75	0.25	0	0	1	1	Day B
7	C03	0.059	0.0129852	-0.812872	69/16_NK	NHS	15	141	160	Peptid 15 - alternative	0.75	7.353	0.0262035	0	0.35	0.65	0.65	0.95	0.95	Day B
7	C04	0.096	0.0539539	-0.744874	69/16_NK	NHS	21	201	220	Peptid 21 - standard	-0.2	9.501	2.02619	0.6	0.4	0	0.25	1	1	Day B
7	C05	0.083	0.0395595	-0.763591	69/16_NK	NHS	27	261	280	Peptid 27 - standard	1.92	5.29	-0.972198	0.15	0.85	0	0.85	1	1	Day B
7	C06	0.066	0.020736	-0.794909	69/16_NK	NHS	33	321	340	Peptid 33 - standard	0.25	11.38	2.86142	0	0.05	0.95	0.3	0.65	0.65	Day B
7	C07	0.168	0.133677	-0.668031	215_SSC	Patient	1	1	20	Peptid 1 - standard	0.715	3.737	-3.91814	1	0	0	0	0.85	0.85	Day B
7	C08	0.073	0.0284869	-0.780621	215_SSC	Patient	12	111	130	Peptid 12 - alternative	1.155	6.161	-0.138536	0.75	0.25	0	0	1	1	Day B
7	C09	0.065	0.0196288	-0.797191	215_SSC	Patient	15	141	160	Peptid 15 - alternative	0.75	7.353	0.0262035	0	0.35	0.65	0.65	0.95	0.95	Day B
7	C10	0.127	0.0882791	-0.708221	215_SSC	Patient	21	201	220	Peptid 21 - standard	-0.2	9.501	2.02619	0.6	0.4	0	0.25	1	1	Day B
7	C11	0.072	0.0273796	-0.782512	215_SSC	Patient	27	261	280	Peptid 27 - standard	1.92	5.29	-0.972198	0.15	0.85	0	0.85	1	1	Day B
7	C12	0.136	0.0982445	-0.698822	215_SSC	Patient	33	321	340	Peptid 33 - standard	0.25	11.38	2.86142	0	0.05	0.95	0.3	0.65	0.65	Day B
7	D01	0.084	0.0406668	-0.762038	69/16_NK	NHS	2	11	30	Peptid 2 - standard	-0.13	3.295	-4.08764	1	0	0	0	0.65	0.65	Day B
7	D02	0.059	0.0129852	-0.812872	69/16_NK	NHS	8	71	90	Peptid 8 - standard	0.305	10.398	0.910742	0	0.55	0.45	0.6	0.9	0.9	Day B
7	D03	0.077	0.0329159	-0.773438	69/16_NK	NHS	16	151	170	Peptid 16 - alternative	-0.105	12.204	3.0739	0	0.05	0.95	0.35	0.75	0.75	Day B
7	D04	0.095	0.0528467	-0.746216	69/16_NK	NHS	17	161	180	Peptid 17 - alternative	0.62	10.518	2.81369	0	0.55	0.45	0.7	0.8	0.8	Day B
7	D05	0.22	0.191255	-0.623231	69/16_NK	NHS	28	271	290	Peptid 28 - standard	1.21	5.406	-0.970632	0.65	0.35	0	0.35	0.95	0.95	Day B
7	D06	0.059	0.0129852	-0.812872	69/16_NK	NHS	34	331	350	Peptid 34 - standard	-0.485	12.199	2.86142	0	0	1	0	0.45	0.45	Day B
7	D07	0.171	0.136999	-0.665304	215_SSC	Patient	2	11	30	Peptid 2 - standard	-0.13	3.295	-4.08764	1	0	0	0	0.65	0.65	Day B
7	D08	0.112	0.0716702	-0.724948	215_SSC	Patient	8	71	90	Peptid 8 - standard	0.305	10.398	0.910742	0	0.55	0.45	0.6	0.9	0.9	Day B
7	D09	0.085	0.041774	-0.760507	215_SSC	Patient	16	151	170	Peptid 16 - alternative	-0.105	12.204	3.0739	0	0.05	0.95	0.35	0.75	0.75	Day B
7	D10	0.151	0.114853	-0.683954	215_SSC	Patient	17	161	180	Peptid 17 - alternative	0.62	10.518	2.81369	0	0.55	0.45	0.7	0.8	0.8	Day B
7	D11	0.138	0.100459	-0.696786	215_SSC	Patient	28	271	290	Peptid 28 - standard	1.21	5.406	-0.970632	0.65	0.35	0	0.35	0.95	0.95	Day B
7	D12	0.071	0.0262723	-0.784447	215_SSC	Patient	34	331	350	Peptid 34 - standard	-0.485	12.199	2.86142	0	0	1	0	0.45	0.45	Day B
7	E01	0.161	0.125926	-0.674486	69/16_NK	NHS	3	21	40	Peptid 3 - standard	-1.26	3.226	-5.18152	1	0	0	0	0.45	0.45	Day B
7	E02	0.055	0.00855613	-0.826422	69/16_NK	NHS	9	81	100	Peptid 9 - standard	0.2	7.552	0.0786615	0	0.55	0.45	0.65	0.9	0.9	Day B
7	E03	0.095	0.0528467	-0.746216	69/16_NK	NHS	15	141	160	Peptid 15 - standard	0.75	7.353	0.0262035	0	0.35	0.65	0.65	0.95	0.95	Day B
7	E04	0.157	0.121497	-0.678236	69/16_NK	NHS	23	221	240	Peptid 23 - alternative	1.925	7.352	0.0246369	0	0.65	0.35	0.95	1	1	Day B
7	E05	0.06	0.0140924	-0.809962	69/16_NK	NHS	24	231	250	Peptid 24 - alternative	0.505	10.134	3.02459	0	0.15	0.85	0.45	0.8	0.8	Day B
7	E06	0.061	0.0151997	-0.807191	69/16_NK	NHS	35	341	360	Peptid 35 - standard	-2.005	12.023	1.91229	0	0	1	0	0	0	Day B
7	E07	0.138	0.100459	-0.696786	215_SSC	Patient	3	21	40	Peptid 3 - standard	-1.26	3.226	-5.18152	1	0	0	0	0.45	0.45	Day B
7	E08	0.062	0.016307	-0.804541	215_SSC	Patient	9	81	100	Peptid 9 - standard	0.2	7.552	0.0786615	0	0.55	0.45	0.65	0.9	0.9	Day B
7	E09	0.07	0.0251651	-0.78643	215_SSC	Patient	15	141	160	Peptid 15 - standard	0.75	7.353	0.0262035	0	0.35	0.65	0.65	0.95	0.95	Day B
7	E10	0.323	0.305303	-0.542638	215_SSC	Patient	23	221	240	Peptid 23 - alternative	1.925	7.352	0.0246369	0	0.65	0.35	0.95	1	1	Day B
7	E11	0.08	0.0362377	-0.768393	215_SSC	Patient	24	231	250	Peptid 24 - alternative	0.505	10.134	3.02459	0	0.15	0.85	0.45	0.8	0.8	Day B
7	E12	0.07	0.0251651	-0.78643	215_SSC	Patient	35	341	360	Peptid 35 - standard	-2.005	12.023	1.91229	0	0	1	0	0	0	Day B
7	F01	0.575	0.584333	-0.349502	69/16_NK	NHS	4	31	50	Peptid 4 - standard	-0.955	3.295	-4.22766	1	0	0	0	0.7	0.7	Day B
7	F02	0.066	0.020736	-0.794909	69/16_NK	NHS	10	91	110	Peptid 10 - standard	1.82	5.292	-0.922889	0	1	0	0.95	1	1	Day B
7	F03	0.115	0.0749919	-0.721478	69/16_NK	NHS	16	151	170	Peptid 16 - standard	-0.105	12.204	3.0739	0	0.05	0.95	0.35	0.75	0.75	Day B
7	F04	0.065	0.0196288	-0.797191	69/16_NK	NHS	22	211	230	Peptid 22 - standard	1.5	12.5	1.90916	0.1	0.9	0	0.75	1	1	Day B
7	F05	0.064	0.0185215	-0.799552	69/16_NK	NHS	26	251	270	Peptid 26 - alternative	1.85	10.526	1.86143	0	0.75	0.25	0.9	0.9	0.9	Day B
7	F06	0.054	0.00744886	-0.8305	69/16_NK	NHS	NK	NA	NA	Negative Control	NA	6.1	-0.0908091	NA	NA	NA	NA	NA	NA	Day B
7	F07	0.517	0.520112	-0.3953	215_SSC	Patient	4	31	50	Peptid 4 - standard	-0.955	3.295	-4.22766	1	0	0	0	0.7	0.7	Day B
7	F08	0.09	0.0473104	-0.753149	215_SSC	Patient	10	91	110	Peptid 10 - standard	1.82	5.292	-0.922889	0	1	0	0.95	1	1	Day B
7	F09	0.108	0.0672411	-0.729691	215_SSC	Patient	16	151	170	Peptid 16 - standard	-0.105	12.204	3.0739	0	0.05	0.95	0.35	0.75	0.75	Day B
7	F10	0.088	0.0450958	-0.756036	215_SSC	Patient	22	211	230	Peptid 22 - standard	1.5	12.5	1.90916	0.1	0.9	0	0.75	1	1	Day B
7	F11	0.063	0.0174142	-0.801999	215_SSC	Patient	26	251	270	Peptid 26 - alternative	1.85	10.526	1.86143	0	0.75	0.25	0.9	0.9	0.9	Day B
7	F12	0.066	0.020736	-0.794909	215_SSC	Patient	NK	NA	NA	Negative Control	NA	6.1	-0.0908091	NA	NA	NA	NA	NA	NA	Day B
7	G01	0.156	0.12039	-0.679181	69/16_NK	NHS	5	41	60	Peptid 5 - standard	-0.055	4.109	-1.13697	0.65	0.35	0	0.3	0.85	0.85	Day B
7	G02	0.106	0.0650266	-0.732116	69/16_NK	NHS	11	101	120	Peptid 11 - standard	1.625	3.75	-1.08923	0.5	0.5	0	0.45	1	1	Day B
7	G03	0.068	0.0229506	-0.79055	69/16_NK	NHS	17	161	180	Peptid 17 - standard	0.62	10.518	2.81369	0	0.55	0.45	0.7	0.8	0.8	Day B
7	G04	0.061	0.0151997	-0.807191	69/16_NK	NHS	23	221	240	Peptid 23 - standard	1.925	7.352	0.0246369	0	0.65	0.35	0.95	1	1	Day B
7	G05	0.059	0.0129852	-0.812872	69/16_NK	NHS	29	281	300	Peptid 29 - standard	-0.36	8.545	0.864581	0.9	0.1	0	0.05	0.75	0.75	Day B
7	G06	0.232	0.204542	-0.613449	69/16_NK	NHS	31	301	320	Peptid 31 - alternative	0.845	7.249	-0.0230898	0	1	0	1	0.95	0.95	Day B
7	G07	0.133	0.0949227	-0.70191	215_SSC	Patient	5	41	60	Peptid 5 - standard	-0.055	4.109	-1.13697	0.65	0.35	0	0.3	0.85	0.85	Day B
7	G08	0.098	0.0561685	-0.742228	215_SSC	Patient	11	101	120	Peptid 11 - standard	1.625	3.75	-1.08923	0.5	0.5	0	0.45	1	1	Day B
7	G09	0.065	0.0196288	-0.797191	215_SSC	Patient	17	161	180	Peptid 17 - standard	0.62	10.518	2.81369	0	0.55	0.45	0.7	0.8	0.8	Day B
7	G10	0.081	0.037345	-0.766767	215_SSC	Patient	23	221	240	Peptid 23 - standard	1.925	7.352	0.0246369	0	0.65	0.35	0.95	1	1	Day B
7	G11	0.105	0.0639193	-0.733343	215_SSC	Patient	29	281	300	Peptid 29 - standard	-0.36	8.545	0.864581	0.9	0.1	0	0.05	0.75	0.75	Day B
7	G12	0.236	0.208971	-0.610222	215_SSC	Patient	31	301	320	Peptid 31 - alternative	0.845	7.249	-0.0230898	0	1	0	1	0.95	0.95	Day B
7	H01	0.135	0.0971372	-0.699847	69/16_NK	NHS	6	51	70	Peptid 6 - standard	1.495	6.332	-0.090825	0.15	0.85	0	0.8	0.9	0.9	Day B
7	H02	0.17	0.135891	-0.66621	69/16_NK	NHS	12	111	130	Peptid 12 - standard	1.155	6.161	-0.138536	0.75	0.25	0	0	1	1	Day B
7	H03	0.155	0.119282	-0.680129	69/16_NK	NHS	18	171	190	Peptid 18 - standard	2.07	3.75	-1.18468	0.05	0.95	0	0.9	1	1	Day B
7	H04	0.069	0.0240578	-0.788463	69/16_NK	NHS	24	231	250	Peptid 24 - standard	0.505	10.134	3.02459	0	0.15	0.85	0.45	0.8	0.8	Day B
7	H05	0.072	0.0273796	-0.782512	69/16_NK	NHS	30	291	310	Peptid 30 - standard	-0.43	9.299	1.0755	0.4	0.6	0	0.55	0.75	0.75	Day B
7	H06	0.068	0.0229506	-0.79055	69/16_NK	NHS	36	351	370	Peptid 36 - standard	-1.26667	4.426	-1.08768	0	0	1	0	0	0	Day B
7	H07	0.114	0.0738847	-0.722627	215_SSC	Patient	6	51	70	Peptid 6 - standard	1.495	6.332	-0.090825	0.15	0.85	0	0.8	0.9	0.9	Day B
7	H08	0.136	0.0982445	-0.698822	215_SSC	Patient	12	111	130	Peptid 12 - standard	1.155	6.161	-0.138536	0.75	0.25	0	0	1	1	Day B
7	H09	0.217	0.187933	-0.625702	215_SSC	Patient	18	171	190	Peptid 18 - standard	2.07	3.75	-1.18468	0.05	0.95	0	0.9	1	1	Day B
7	H10	0.355	0.340735	-0.518455	215_SSC	Patient	24	231	250	Peptid 24 - standard	0.505	10.134	3.02459	0	0.15	0.85	0.45	0.8	0.8	Day B
7	H11	0.077	0.0329159	-0.773438	215_SSC	Patient	30	291	310	Peptid 30 - standard	-0.43	9.299	1.0755	0.4	0.6	0	0.55	0.75	0.75	Day B
7	H12	0.071	0.0262723	-0.784447	215_SSC	Patient	36	351	370	Peptid 36 - standard	-1.26667	4.426	-1.08768	0	0	1	0	0	0	Day B
8	A01	0.179	0.181714	-0.630358	226_SSC	Patient	7	61	80	Peptid 7 - alternative	2.035	6.1	-0.0908091	0	1	0	0.95	0.95	0.95	Day A
8	A02	0.195	0.206916	-0.611717	226_SSC	Patient	7	61	80	Peptid 7 - standard	2.035	6.1	-0.0908091	0	1	0	0.95	0.95	0.95	Day A
8	A03	0.178	0.180139	-0.631544	226_SSC	Patient	13	121	140	Peptid 13 - standard	1.06	8.523	0.858299	0.25	0.75	0	0.5	0.75	0.75	Day A
8	A04	0.184	0.18959	-0.624469	226_SSC	Patient	19	181	200	Peptid 19 - standard	0.31	5.361	-1.7534	0.55	0.45	0	0.4	0.7	0.7	Day A
8	A05	0.529	0.733014	-0.236986	226_SSC	Patient	25	241	260	Peptid 25 - standard	0.845	13.102	4.90911	0	0.25	0.75	0.4	0.7	0.7	Day A
8	A06	0.183	0.188015	-0.625641	226_SSC	Patient	31	301	320	Peptid 31 - standard	0.845	7.249	-0.0230898	0	1	0	1	0.95	0.95	Day A
8	A07	0.099	0.0557027	-0.74278	368_SSC	Patient	7	61	80	Peptid 7 - alternative	2.035	6.1	-0.0908091	0	1	0	0.95	0.95	0.95	Day A
8	A08	0.132	0.107682	-0.690265	368_SSC	Patient	7	61	80	Peptid 7 - standard	2.035	6.1	-0.0908091	0	1	0	0.95	0.95	0.95	Day A
8	A09	0.093	0.0462519	-0.75452	368_SSC	Patient	13	121	140	Peptid 13 - standard	1.06	8.523	0.858299	0.25	0.75	0	0.5	0.75	0.75	Day A
8	A10	0.252	0.296699	-0.54854	368_SSC	Patient	19	181	200	Peptid 19 - standard	0.31	5.361	-1.7534	0.55	0.45	0	0.4	0.7	0.7	Day A
8	A11	0.399	0.528245	-0.389572	368_SSC	Patient	25	241	260	Peptid 25 - standard	0.845	13.102	4.90911	0	0.25	0.75	0.4	0.7	0.7	Day A
8	A12	0.11	0.0730293	-0.72352	368_SSC	Patient	31	301	320	Peptid 31 - standard	0.845	7.249	-0.0230898	0	1	0	1	0.95	0.95	Day A
8	B01	0.635	0.899979	-0.0953373	226_SSC	Patient	NA	NA	NA	Positive Control	NA	6.1	-0.0908091	NA	NA	NA	NA	NA	NA	Day A
8	B02	0.192	0.202191	-0.615169	226_SSC	Patient	11	101	120	Peptid 11 - standard	1.625	3.75	-1.08923	0.5	0.5	0	0.45	1	1	Day A
8	B03	0.201	0.216367	-0.604865	226_SSC	Patient	14	131	150	Peptid 14 - standard	0.895	6.155	-0.140134	0	0.85	0.15	1	0.75	0.75	Day A
8	B04	0.176	0.176989	-0.633924	226_SSC	Patient	20	191	210	Peptid 20 - standard	-1.13	6.782	-0.637957	1	0	0	0	0.7	0.7	Day A
8	B05	0.191	0.200616	-0.616324	226_SSC	Patient	26	251	270	Peptid 26 - standard	1.85	10.526	1.86143	0	0.75	0.25	0.9	0.9	0.9	Day A
8	B06	0.308	0.384907	-0.488426	226_SSC	Patient	32	311	330	Peptid 32 - standard	0.5	8.798	1.81212	0	0.55	0.45	0.8	0.7	0.7	Day A
8	B07	0.633	0.896828	-0.098198	368_SSC	Patient	NA	NA	NA	Positive Control	NA	6.1	-0.0908091	NA	NA	NA	NA	NA	NA	Day A
8	B08	0.098	0.0541276	-0.744664	368_SSC	Patient	11	101	120	Peptid 11 - standard	1.625	3.75	-1.08923	0.5	0.5	0	0.45	1	1	Day A
8	B09	0.096	0.0509773	-0.748515	368_SSC	Patient	14	131	150	Peptid 14 - standard	0.895	6.155	-0.140134	0	0.85	0.15	1	0.75	0.75	Day A
8	B10	0.109	0.0714541	-0.725177	368_SSC	Patient	20	191	210	Peptid 20 - standard	-1.13	6.782	-0.637957	1	0	0	0	0.7	0.7	Day A
8	B11	0.142	0.123434	-0.67659	368_SSC	Patient	26	251	270	Peptid 26 - standard	1.85	10.526	1.86143	0	0.75	0.25	0.9	0.9	0.9	Day A
8	B12	0.134	0.110833	-0.687474	368_SSC	Patient	32	311	330	Peptid 32 - standard	0.5	8.798	1.81212	0	0.55	0.45	0.8	0.7	0.7	Day A
8	C01	0.196	0.208491	-0.61057	226_SSC	Patient	1	1	20	Peptid 1 - standard	0.715	3.737	-3.91814	1	0	0	0	0.85	0.85	Day A
8	C02	0.206	0.224243	-0.599203	226_SSC	Patient	12	111	130	Peptid 12 - alternative	1.155	6.161	-0.138536	0.75	0.25	0	0	1	1	Day A
8	C03	0.219	0.24472	-0.584656	226_SSC	Patient	15	141	160	Peptid 15 - alternative	0.75	7.353	0.0262035	0	0.35	0.65	0.65	0.95	0.95	Day A
8	C04	0.405	0.537696	-0.382892	226_SSC	Patient	21	201	220	Peptid 21 - standard	-0.2	9.501	2.02619	0.6	0.4	0	0.25	1	1	Day A
8	C05	0.215	0.238419	-0.589107	226_SSC	Patient	27	261	280	Peptid 27 - standard	1.92	5.29	-0.972198	0.15	0.85	0	0.85	1	1	Day A
8	C06	0.331	0.421136	-0.46375	226_SSC	Patient	33	321	340	Peptid 33 - standard	0.25	11.38	2.86142	0	0.05	0.95	0.3	0.65	0.65	Day A
8	C07	0.111	0.0746044	-0.721879	368_SSC	Patient	1	1	20	Peptid 1 - standard	0.715	3.737	-3.91814	1	0	0	0	0.85	0.85	Day A
8	C08	0.107	0.0683039	-0.72854	368_SSC	Patient	12	111	130	Peptid 12 - alternative	1.155	6.161	-0.138536	0.75	0.25	0	0	1	1	Day A
8	C09	0.111	0.0746044	-0.721879	368_SSC	Patient	15	141	160	Peptid 15 - alternative	0.75	7.353	0.0262035	0	0.35	0.65	0.65	0.95	0.95	Day A
8	C10	0.169	0.165963	-0.642345	368_SSC	Patient	21	201	220	Peptid 21 - standard	-0.2	9.501	2.02619	0.6	0.4	0	0.25	1	1	Day A
8	C11	0.103	0.0620033	-0.735489	368_SSC	Patient	27	261	280	Peptid 27 - standard	1.92	5.29	-0.972198	0.15	0.85	0	0.85	1	1	Day A
8	C12	0.277	0.336078	-0.521625	368_SSC	Patient	33	321	340	Peptid 33 - standard	0.25	11.38	2.86142	0	0.05	0.95	0.3	0.65	0.65	Day A
8	D01	0.207	0.225818	-0.598075	226_SSC	Patient	2	11	30	Peptid 2 - standard	-0.13	3.295	-4.08764	1	0	0	0	0.65	0.65	Day A
8	D02	0.197	0.210067	-0.609425	226_SSC	Patient	8	71	90	Peptid 8 - standard	0.305	10.398	0.910742	0	0.55	0.45	0.6	0.9	0.9	Day A
8	D03	0.34	0.435312	-0.454057	226_SSC	Patient	16	151	170	Peptid 16 - alternative	-0.105	12.204	3.0739	0	0.05	0.95	0.35	0.75	0.75	Day A
8	D04	0.204	0.221093	-0.601462	226_SSC	Patient	17	161	180	Peptid 17 - alternative	0.62	10.518	2.81369	0	0.55	0.45	0.7	0.8	0.8	Day A
8	D05	0.186	0.19274	-0.62213	226_SSC	Patient	28	271	290	Peptid 28 - standard	1.21	5.406	-0.970632	0.65	0.35	0	0.35	0.95	0.95	Day A
8	D06	0.597	0.840123	-0.148361	226_SSC	Patient	34	331	350	Peptid 34 - standard	-0.485	12.199	2.86142	0	0	1	0	0.45	0.45	Day A
8	D07	0.096	0.0509773	-0.748515	368_SSC	Patient	2	11	30	Peptid 2 - standard	-0.13	3.295	-4.08764	1	0	0	0	0.65	0.65	Day A
8	D08	0.104	0.0635784	-0.733723	368_SSC	Patient	8	71	90	Peptid 8 - standard	0.305	10.398	0.910742	0	0.55	0.45	0.6	0.9	0.9	Day A
8	D09	0.188	0.19589	-0.619801	368_SSC	Patient	16	151	170	Peptid 16 - alternative	-0.105	12.204	3.0739	0	0.05	0.95	0.35	0.75	0.75	Day A
8	D10	0.11	0.0730293	-0.72352	368_SSC	Patient	17	161	180	Peptid 17 - alternative	0.62	10.518	2.81369	0	0.55	0.45	0.7	0.8	0.8	Day A
8	D11	0.09	0.0415265	-0.760847	368_SSC	Patient	28	271	290	Peptid 28 - standard	1.21	5.406	-0.970632	0.65	0.35	0	0.35	0.95	0.95	Day A
8	D12	0.513	0.707811	-0.256825	368_SSC	Patient	34	331	350	Peptid 34 - standard	-0.485	12.199	2.86142	0	0	1	0	0.45	0.45	Day A
8	E01	0.205	0.222668	-0.600332	226_SSC	Patient	3	21	40	Peptid 3 - standard	-1.26	3.226	-5.18152	1	0	0	0	0.45	0.45	Day A
8	E02	0.252	0.296699	-0.54854	226_SSC	Patient	9	81	100	Peptid 9 - standard	0.2	7.552	0.0786615	0	0.55	0.45	0.65	0.9	0.9	Day A
8	E03	0.197	0.210067	-0.609425	226_SSC	Patient	15	141	160	Peptid 15 - standard	0.75	7.353	0.0262035	0	0.35	0.65	0.65	0.95	0.95	Day A
8	E04	0.113	0.0777547	-0.718642	226_SSC	Patient	23	221	240	Peptid 23 - alternative	1.925	7.352	0.0246369	0	0.65	0.35	0.95	1	1	Day A
8	E05	0.143	0.125009	-0.675258	226_SSC	Patient	24	231	250	Peptid 24 - alternative	0.505	10.134	3.02459	0	0.15	0.85	0.45	0.8	0.8	Day A
8	E06	0.21	0.230543	-0.594701	226_SSC	Patient	35	341	360	Peptid 35 - standard	-2.005	12.023	1.91229	0	0	1	0	0	0	Day A
8	E07	0.103	0.0620033	-0.735489	368_SSC	Patient	3	21	40	Peptid 3 - standard	-1.26	3.226	-5.18152	1	0	0	0	0.45	0.45	Day A
8	E08	0.148	0.132885	-0.668685	368_SSC	Patient	9	81	100	Peptid 9 - standard	0.2	7.552	0.0786615	0	0.55	0.45	0.65	0.9	0.9	Day A
8	E09	0.143	0.125009	-0.675258	368_SSC	Patient	15	141	160	Peptid 15 - standard	0.75	7.353	0.0262035	0	0.35	0.65	0.65	0.95	0.95	Day A
8	E10	0.074	0.0163242	-0.804501	368_SSC	Patient	23	221	240	Peptid 23 - alternative	1.925	7.352	0.0246369	0	0.65	0.35	0.95	1	1	Day A
8	E11	0.122	0.091931	-0.704729	368_SSC	Patient	24	231	250	Peptid 24 - alternative	0.505	10.134	3.02459	0	0.15	0.85	0.45	0.8	0.8	Day A
8	E12	0.09	0.0415265	-0.760847	368_SSC	Patient	35	341	360	Peptid 35 - standard	-2.005	12.023	1.91229	0	0	1	0	0	0	Day A
8	F01	0.163	0.156512	-0.649691	226_SSC	Patient	4	31	50	Peptid 4 - standard	-0.955	3.295	-4.22766	1	0	0	0	0.7	0.7	Day A
8	F02	0.182	0.186439	-0.626817	226_SSC	Patient	10	91	110	Peptid 10 - standard	1.82	5.292	-0.922889	0	1	0	0.95	1	1	Day A
8	F03	0.2	0.214792	-0.606002	226_SSC	Patient	16	151	170	Peptid 16 - standard	-0.105	12.204	3.0739	0	0.05	0.95	0.35	0.75	0.75	Day A
8	F04	0.179	0.181714	-0.630358	226_SSC	Patient	22	211	230	Peptid 22 - standard	1.5	12.5	1.90916	0.1	0.9	0	0.75	1	1	Day A
8	F05	0.122	0.091931	-0.704729	226_SSC	Patient	26	251	270	Peptid 26 - alternative	1.85	10.526	1.86143	0	0.75	0.25	0.9	0.9	0.9	Day A
8	F06	0.116	0.0824801	-0.713893	226_SSC	Patient	NK	NA	NA	Negative Control	NA	6.1	-0.0908091	NA	NA	NA	NA	NA	NA	Day A
8	F07	0.08	0.025775	-0.785332	368_SSC	Patient	4	31	50	Peptid 4 - standard	-0.955	3.295	-4.22766	1	0	0	0	0.7	0.7	Day A
8	F08	0.097	0.0525524	-0.746575	368_SSC	Patient	10	91	110	Peptid 10 - standard	1.82	5.292	-0.922889	0	1	0	0.95	1	1	Day A
8	F09	0.138	0.117133	-0.681979	368_SSC	Patient	16	151	170	Peptid 16 - standard	-0.105	12.204	3.0739	0	0.05	0.95	0.35	0.75	0.75	Day A
8	F10	0.086	0.0352259	-0.769902	368_SSC	Patient	22	211	230	Peptid 22 - standard	1.5	12.5	1.90916	0.1	0.9	0	0.75	1	1	Day A
8	F11	0.093	0.0462519	-0.75452	368_SSC	Patient	26	251	270	Peptid 26 - alternative	1.85	10.526	1.86143	0	0.75	0.25	0.9	0.9	0.9	Day A
8	F12	0.084	0.0320756	-0.774757	368_SSC	Patient	NK	NA	NA	Negative Control	NA	6.1	-0.0908091	NA	NA	NA	NA	NA	NA	Day A
8	G01	0.184	0.18959	-0.624469	226_SSC	Patient	5	41	60	Peptid 5 - standard	-0.055	4.109	-1.13697	0.65	0.35	0	0.3	0.85	0.85	Day A
8	G02	0.217	0.241569	-0.586879	226_SSC	Patient	11	101	120	Peptid 11 - standard	1.625	3.75	-1.08923	0.5	0.5	0	0.45	1	1	Day A
8	G03	0.359	0.465239	-0.433493	226_SSC	Patient	17	161	180	Peptid 17 - standard	0.62	10.518	2.81369	0	0.55	0.45	0.7	0.8	0.8	Day A
8	G04	0.25	0.293549	-0.550705	226_SSC	Patient	23	221	240	Peptid 23 - standard	1.925	7.352	0.0246369	0	0.65	0.35	0.95	1	1	Day A
8	G05	0.146	0.129734	-0.671298	226_SSC	Patient	29	281	300	Peptid 29 - standard	-0.36	8.545	0.864581	0.9	0.1	0	0.05	0.75	0.75	Day A
8	G06	0.173	0.172263	-0.637515	226_SSC	Patient	31	301	320	Peptid 31 - alternative	0.845	7.249	-0.0230898	0	1	0	1	0.95	0.95	Day A
8	G07	0.098	0.0541276	-0.744664	368_SSC	Patient	5	41	60	Peptid 5 - standard	-0.055	4.109	-1.13697	0.65	0.35	0	0.3	0.85	0.85	Day A
8	G08	0.121	0.0903558	-0.706228	368_SSC	Patient	11	101	120	Peptid 11 - standard	1.625	3.75	-1.08923	0.5	0.5	0	0.45	1	1	Day A
8	G09	0.254	0.29985	-0.546377	368_SSC	Patient	17	161	180	Peptid 17 - standard	0.62	10.518	2.81369	0	0.55	0.45	0.7	0.8	0.8	Day A
8	G10	0.078	0.0226248	-0.791176	368_SSC	Patient	23	221	240	Peptid 23 - standard	1.925	7.352	0.0246369	0	0.65	0.35	0.95	1	1	Day A
8	G11	0.076	0.0194745	-0.797516	368_SSC	Patient	29	281	300	Peptid 29 - standard	-0.36	8.545	0.864581	0.9	0.1	0	0.05	0.75	0.75	Day A
8	G12	0.074	0.0163242	-0.804501	368_SSC	Patient	31	301	320	Peptid 31 - alternative	0.845	7.249	-0.0230898	0	1	0	1	0.95	0.95	Day A
8	H01	0.153	0.14076	-0.662242	226_SSC	Patient	6	51	70	Peptid 6 - standard	1.495	6.332	-0.090825	0.15	0.85	0	0.8	0.9	0.9	Day A
8	H02	0.143	0.125009	-0.675258	226_SSC	Patient	12	111	130	Peptid 12 - standard	1.155	6.161	-0.138536	0.75	0.25	0	0	1	1	Day A
8	H03	0.124	0.0950813	-0.701762	226_SSC	Patient	18	171	190	Peptid 18 - standard	2.07	3.75	-1.18468	0.05	0.95	0	0.9	1	1	Day A
8	H04	0.346	0.444763	-0.447579	226_SSC	Patient	24	231	250	Peptid 24 - standard	0.505	10.134	3.02459	0	0.15	0.85	0.45	0.8	0.8	Day A
8	H05	0.13	0.104532	-0.693088	226_SSC	Patient	30	291	310	Peptid 30 - standard	-0.43	9.299	1.0755	0.4	0.6	0	0.55	0.75	0.75	Day A
8	H06	0.135	0.112408	-0.68609	226_SSC	Patient	36	351	370	Peptid 36 - standard	-1.26667	4.426	-1.08768	0	0	1	0	0	0	Day A
8	H07	0.074	0.0163242	-0.804501	368_SSC	Patient	6	51	70	Peptid 6 - standard	1.495	6.332	-0.090825	0.15	0.85	0	0.8	0.9	0.9	Day A
8	H08	0.076	0.0194745	-0.797516	368_SSC	Patient	12	111	130	Peptid 12 - standard	1.155	6.161	-0.138536	0.75	0.25	0	0	1	1	Day A
8	H09	0.07	0.0100236	-0.821518	368_SSC	Patient	18	171	190	Peptid 18 - standard	2.07	3.75	-1.18468	0.05	0.95	0	0.9	1	1	Day A
8	H10	0.238	0.274647	-0.563751	368_SSC	Patient	24	231	250	Peptid 24 - standard	0.505	10.134	3.02459	0	0.15	0.85	0.45	0.8	0.8	Day A
8	H11	0.078	0.0226248	-0.791176	368_SSC	Patient	30	291	310	Peptid 30 - standard	-0.43	9.299	1.0755	0.4	0.6	0	0.55	0.75	0.75	Day A
8	H12	0.075	0.0178993	-0.800915	368_SSC	Patient	36	351	370	Peptid 36 - standard	-1.26667	4.426	-1.08768	0	0	1	0	0	0	Day A
9	A01	0.052	0.012946	-0.812978	235_SSC	Patient	7	61	80	Peptid 7 - alternative	2.035	6.1	-0.0908091	0	1	0	0.95	0.95	0.95	Day A
9	A02	0.049	0.00913158	-0.824439	235_SSC	Patient	7	61	80	Peptid 7 - standard	2.035	6.1	-0.0908091	0	1	0	0.95	0.95	0.95	Day A
9	A03	0.049	0.00913158	-0.824439	235_SSC	Patient	13	121	140	Peptid 13 - standard	1.06	8.523	0.858299	0.25	0.75	0	0.5	0.75	0.75	Day A
9	A04	0.056	0.018032	-0.800622	235_SSC	Patient	19	181	200	Peptid 19 - standard	0.31	5.361	-1.7534	0.55	0.45	0	0.4	0.7	0.7	Day A
9	A05	0.063	0.0269324	-0.783288	235_SSC	Patient	25	241	260	Peptid 25 - standard	0.845	13.102	4.90911	0	0.25	0.75	0.4	0.7	0.7	Day A
9	A06	0.066	0.0307468	-0.776884	235_SSC	Patient	31	301	320	Peptid 31 - standard	0.845	7.249	-0.0230898	0	1	0	1	0.95	0.95	Day A
9	A07	0.093	0.0650769	-0.73206	80_SSC	Patient	7	61	80	Peptid 7 - alternative	2.035	6.1	-0.0908091	0	1	0	0.95	0.95	0.95	Day A
9	A08	0.071	0.0371042	-0.767118	80_SSC	Patient	7	61	80	Peptid 7 - standard	2.035	6.1	-0.0908091	0	1	0	0.95	0.95	0.95	Day A
9	A09	0.067	0.0320183	-0.774848	80_SSC	Patient	13	121	140	Peptid 13 - standard	1.06	8.523	0.858299	0.25	0.75	0	0.5	0.75	0.75	Day A
9	A10	0.057	0.0193035	-0.797877	80_SSC	Patient	19	181	200	Peptid 19 - standard	0.31	5.361	-1.7534	0.55	0.45	0	0.4	0.7	0.7	Day A
9	A11	0.129	0.11085	-0.687458	80_SSC	Patient	25	241	260	Peptid 25 - standard	0.845	13.102	4.90911	0	0.25	0.75	0.4	0.7	0.7	Day A
9	A12	0.062	0.0256609	-0.785536	80_SSC	Patient	31	301	320	Peptid 31 - standard	0.845	7.249	-0.0230898	0	1	0	1	0.95	0.95	Day A
9	B01	0.732	0.877556	-0.115525	235_SSC	Patient	NA	NA	NA	Positive Control	NA	6.1	-0.0908091	NA	NA	NA	NA	NA	NA	Day A
9	B02	0.048	0.00786009	-0.828942	235_SSC	Patient	11	101	120	Peptid 11 - standard	1.625	3.75	-1.08923	0.5	0.5	0	0.45	1	1	Day A
9	B03	0.048	0.00786009	-0.828942	235_SSC	Patient	14	131	150	Peptid 14 - standard	0.895	6.155	-0.140134	0	0.85	0.15	1	0.75	0.75	Day A
9	B04	0.061	0.0243894	-0.787848	235_SSC	Patient	20	191	210	Peptid 20 - standard	-1.13	6.782	-0.637957	1	0	0	0	0.7	0.7	Day A
9	B05	0.078	0.0460046	-0.754843	235_SSC	Patient	26	251	270	Peptid 26 - standard	1.85	10.526	1.86143	0	0.75	0.25	0.9	0.9	0.9	Day A
9	B06	0.071	0.0371042	-0.767118	235_SSC	Patient	32	311	330	Peptid 32 - standard	0.5	8.798	1.81212	0	0.55	0.45	0.8	0.7	0.7	Day A
9	B07	0.753	0.904257	-0.0914389	80_SSC	Patient	NA	NA	NA	Positive Control	NA	6.1	-0.0908091	NA	NA	NA	NA	NA	NA	Day A
9	B08	0.062	0.0256609	-0.785536	80_SSC	Patient	11	101	120	Peptid 11 - standard	1.625	3.75	-1.08923	0.5	0.5	0	0.45	1	1	Day A
9	B09	0.056	0.018032	-0.800622	80_SSC	Patient	14	131	150	Peptid 14 - standard	0.895	6.155	-0.140134	0	0.85	0.15	1	0.75	0.75	Day A
9	B10	0.054	0.015489	-0.806488	80_SSC	Patient	20	191	210	Peptid 20 - standard	-1.13	6.782	-0.637957	1	0	0	0	0.7	0.7	Day A
9	B11	0.124	0.104493	-0.693123	80_SSC	Patient	26	251	270	Peptid 26 - standard	1.85	10.526	1.86143	0	0.75	0.25	0.9	0.9	0.9	Day A
9	B12	0.053	0.0142175	-0.809643	80_SSC	Patient	32	311	330	Peptid 32 - standard	0.5	8.798	1.81212	0	0.55	0.45	0.8	0.7	0.7	Day A
9	C01	0.052	0.012946	-0.812978	235_SSC	Patient	1	1	20	Peptid 1 - standard	0.715	3.737	-3.91814	1	0	0	0	0.85	0.85	Day A
9	C02	0.052	0.012946	-0.812978	235_SSC	Patient	12	111	130	Peptid 12 - alternative	1.155	6.161	-0.138536	0.75	0.25	0	0	1	1	Day A
9	C03	0.063	0.0269324	-0.783288	235_SSC	Patient	15	141	160	Peptid 15 - alternative	0.75	7.353	0.0262035	0	0.35	0.65	0.65	0.95	0.95	Day A
9	C04	0.14	0.124837	-0.675404	235_SSC	Patient	21	201	220	Peptid 21 - standard	-0.2	9.501	2.02619	0.6	0.4	0	0.25	1	1	Day A
9	C05	0.065	0.0294753	-0.778967	235_SSC	Patient	27	261	280	Peptid 27 - standard	1.92	5.29	-0.972198	0.15	0.85	0	0.85	1	1	Day A
9	C06	0.162	0.152809	-0.652605	235_SSC	Patient	33	321	340	Peptid 33 - standard	0.25	11.38	2.86142	0	0.05	0.95	0.3	0.65	0.65	Day A
9	C07	0.075	0.0421902	-0.759937	80_SSC	Patient	1	1	20	Peptid 1 - standard	0.715	3.737	-3.91814	1	0	0	0	0.85	0.85	Day A
9	C08	0.071	0.0371042	-0.767118	80_SSC	Patient	12	111	130	Peptid 12 - alternative	1.155	6.161	-0.138536	0.75	0.25	0	0	1	1	Day A
9	C09	0.084	0.0536336	-0.745261	80_SSC	Patient	15	141	160	Peptid 15 - alternative	0.75	7.353	0.0262035	0	0.35	0.65	0.65	0.95	0.95	Day A
9	C10	0.337	0.375319	-0.494944	80_SSC	Patient	21	201	220	Peptid 21 - standard	-0.2	9.501	2.02619	0.6	0.4	0	0.25	1	1	Day A
9	C11	0.058	0.0205749	-0.795236	80_SSC	Patient	27	261	280	Peptid 27 - standard	1.92	5.29	-0.972198	0.15	0.85	0	0.85	1	1	Day A
9	C12	0.119	0.0981355	-0.698923	80_SSC	Patient	33	321	340	Peptid 33 - standard	0.25	11.38	2.86142	0	0.05	0.95	0.3	0.65	0.65	Day A
9	D01	0.053	0.0142175	-0.809643	235_SSC	Patient	2	11	30	Peptid 2 - standard	-0.13	3.295	-4.08764	1	0	0	0	0.65	0.65	Day A
9	D02	0.05	0.0104031	-0.820327	235_SSC	Patient	8	71	90	Peptid 8 - standard	0.305	10.398	0.910742	0	0.55	0.45	0.6	0.9	0.9	Day A
9	D03	0.086	0.0561765	-0.742219	235_SSC	Patient	16	151	170	Peptid 16 - alternative	-0.105	12.204	3.0739	0	0.05	0.95	0.35	0.75	0.75	Day A
9	D04	0.107	0.0828777	-0.713499	235_SSC	Patient	17	161	180	Peptid 17 - alternative	0.62	10.518	2.81369	0	0.55	0.45	0.7	0.8	0.8	Day A
9	D05	0.053	0.0142175	-0.809643	235_SSC	Patient	28	271	290	Peptid 28 - standard	1.21	5.406	-0.970632	0.65	0.35	0	0.35	0.95	0.95	Day A
9	D06	0.358	0.402021	-0.476783	235_SSC	Patient	34	331	350	Peptid 34 - standard	-0.485	12.199	2.86142	0	0	1	0	0.45	0.45	Day A
9	D07	0.079	0.0472761	-0.753193	80_SSC	Patient	2	11	30	Peptid 2 - standard	-0.13	3.295	-4.08764	1	0	0	0	0.65	0.65	Day A
9	D08	0.117	0.0955926	-0.701284	80_SSC	Patient	8	71	90	Peptid 8 - standard	0.305	10.398	0.910742	0	0.55	0.45	0.6	0.9	0.9	Day A
9	D09	0.103	0.0777918	-0.718605	80_SSC	Patient	16	151	170	Peptid 16 - alternative	-0.105	12.204	3.0739	0	0.05	0.95	0.35	0.75	0.75	Day A
9	D10	0.129	0.11085	-0.687458	80_SSC	Patient	17	161	180	Peptid 17 - alternative	0.62	10.518	2.81369	0	0.55	0.45	0.7	0.8	0.8	Day A
9	D11	0.056	0.018032	-0.800622	80_SSC	Patient	28	271	290	Peptid 28 - standard	1.21	5.406	-0.970632	0.65	0.35	0	0.35	0.95	0.95	Day A
9	D12	0.601	0.710991	-0.254341	80_SSC	Patient	34	331	350	Peptid 34 - standard	-0.485	12.199	2.86142	0	0	1	0	0.45	0.45	Day A
9	E01	0.06	0.0231179	-0.790231	235_SSC	Patient	3	21	40	Peptid 3 - standard	-1.26	3.226	-5.18152	1	0	0	0	0.45	0.45	Day A
9	E02	0.102	0.0765203	-0.719904	235_SSC	Patient	9	81	100	Peptid 9 - standard	0.2	7.552	0.0786615	0	0.55	0.45	0.65	0.9	0.9	Day A
9	E03	0.051	0.0116745	-0.816525	235_SSC	Patient	15	141	160	Peptid 15 - standard	0.75	7.353	0.0262035	0	0.35	0.65	0.65	0.95	0.95	Day A
9	E04	0.053	0.0142175	-0.809643	235_SSC	Patient	23	221	240	Peptid 23 - alternative	1.925	7.352	0.0246369	0	0.65	0.35	0.95	1	1	Day A
9	E05	0.06	0.0231179	-0.790231	235_SSC	Patient	24	231	250	Peptid 24 - alternative	0.505	10.134	3.02459	0	0.15	0.85	0.45	0.8	0.8	Day A
9	E06	0.071	0.0371042	-0.767118	235_SSC	Patient	35	341	360	Peptid 35 - standard	-2.005	12.023	1.91229	0	0	1	0	0	0	Day A
9	E07	0.087	0.057448	-0.740723	80_SSC	Patient	3	21	40	Peptid 3 - standard	-1.26	3.226	-5.18152	1	0	0	0	0.45	0.45	Day A
9	E08	0.098	0.0714344	-0.725197	80_SSC	Patient	9	81	100	Peptid 9 - standard	0.2	7.552	0.0786615	0	0.55	0.45	0.65	0.9	0.9	Day A
9	E09	0.074	0.0409187	-0.761687	80_SSC	Patient	15	141	160	Peptid 15 - standard	0.75	7.353	0.0262035	0	0.35	0.65	0.65	0.95	0.95	Day A
9	E10	0.067	0.0320183	-0.774848	80_SSC	Patient	23	221	240	Peptid 23 - alternative	1.925	7.352	0.0246369	0	0.65	0.35	0.95	1	1	Day A
9	E11	0.079	0.0472761	-0.753193	80_SSC	Patient	24	231	250	Peptid 24 - alternative	0.505	10.134	3.02459	0	0.15	0.85	0.45	0.8	0.8	Day A
9	E12	0.142	0.12738	-0.673265	80_SSC	Patient	35	341	360	Peptid 35 - standard	-2.005	12.023	1.91229	0	0	1	0	0	0	Day A
9	F01	0.056	0.018032	-0.800622	235_SSC	Patient	4	31	50	Peptid 4 - standard	-0.955	3.295	-4.22766	1	0	0	0	0.7	0.7	Day A
9	F02	0.074	0.0409187	-0.761687	235_SSC	Patient	10	91	110	Peptid 10 - standard	1.82	5.292	-0.922889	0	1	0	0.95	1	1	Day A
9	F03	0.054	0.015489	-0.806488	235_SSC	Patient	16	151	170	Peptid 16 - standard	-0.105	12.204	3.0739	0	0.05	0.95	0.35	0.75	0.75	Day A
9	F04	0.078	0.0460046	-0.754843	235_SSC	Patient	22	211	230	Peptid 22 - standard	1.5	12.5	1.90916	0.1	0.9	0	0.75	1	1	Day A
9	F05	0.056	0.018032	-0.800622	235_SSC	Patient	26	251	270	Peptid 26 - alternative	1.85	10.526	1.86143	0	0.75	0.25	0.9	0.9	0.9	Day A
9	F06	0.067	0.0320183	-0.774848	235_SSC	Patient	NK	NA	NA	Negative Control	NA	6.1	-0.0908091	NA	NA	NA	NA	NA	NA	Day A
9	F07	0.095	0.0676199	-0.72928	80_SSC	Patient	4	31	50	Peptid 4 - standard	-0.955	3.295	-4.22766	1	0	0	0	0.7	0.7	Day A
9	F08	0.073	0.0396472	-0.763467	80_SSC	Patient	10	91	110	Peptid 10 - standard	1.82	5.292	-0.922889	0	1	0	0.95	1	1	Day A
9	F09	0.061	0.0243894	-0.787848	80_SSC	Patient	16	151	170	Peptid 16 - standard	-0.105	12.204	3.0739	0	0.05	0.95	0.35	0.75	0.75	Day A
9	F10	0.065	0.0294753	-0.778967	80_SSC	Patient	22	211	230	Peptid 22 - standard	1.5	12.5	1.90916	0.1	0.9	0	0.75	1	1	Day A
9	F11	0.061	0.0243894	-0.787848	80_SSC	Patient	26	251	270	Peptid 26 - alternative	1.85	10.526	1.86143	0	0.75	0.25	0.9	0.9	0.9	Day A
9	F12	0.048	0.00786009	-0.828942	80_SSC	Patient	NK	NA	NA	Negative Control	NA	6.1	-0.0908091	NA	NA	NA	NA	NA	NA	Day A
9	G01	0.047	0.0065886	-0.833954	235_SSC	Patient	5	41	60	Peptid 5 - standard	-0.055	4.109	-1.13697	0.65	0.35	0	0.3	0.85	0.85	Day A
9	G02	0.046	0.00531712	-0.839662	235_SSC	Patient	11	101	120	Peptid 11 - standard	1.625	3.75	-1.08923	0.5	0.5	0	0.45	1	1	Day A
9	G03	0.245	0.258343	-0.575095	235_SSC	Patient	17	161	180	Peptid 17 - standard	0.62	10.518	2.81369	0	0.55	0.45	0.7	0.8	0.8	Day A
9	G04	0.082	0.0510906	-0.748374	235_SSC	Patient	23	221	240	Peptid 23 - standard	1.925	7.352	0.0246369	0	0.65	0.35	0.95	1	1	Day A
9	G05	0.069	0.0345613	-0.770906	235_SSC	Patient	29	281	300	Peptid 29 - standard	-0.36	8.545	0.864581	0.9	0.1	0	0.05	0.75	0.75	Day A
9	G06	0.088	0.0587195	-0.739243	235_SSC	Patient	31	301	320	Peptid 31 - alternative	0.845	7.249	-0.0230898	0	1	0	1	0.95	0.95	Day A
9	G07	0.173	0.166796	-0.641704	80_SSC	Patient	5	41	60	Peptid 5 - standard	-0.055	4.109	-1.13697	0.65	0.35	0	0.3	0.85	0.85	Day A
9	G08	0.084	0.0536336	-0.745261	80_SSC	Patient	11	101	120	Peptid 11 - standard	1.625	3.75	-1.08923	0.5	0.5	0	0.45	1	1	Day A
9	G09	0.264	0.282501	-0.558318	80_SSC	Patient	17	161	180	Peptid 17 - standard	0.62	10.518	2.81369	0	0.55	0.45	0.7	0.8	0.8	Day A
9	G10	0.111	0.0879637	-0.708525	80_SSC	Patient	23	221	240	Peptid 23 - standard	1.925	7.352	0.0246369	0	0.65	0.35	0.95	1	1	Day A
9	G11	0.066	0.0307468	-0.776884	80_SSC	Patient	29	281	300	Peptid 29 - standard	-0.36	8.545	0.864581	0.9	0.1	0	0.05	0.75	0.75	Day A
9	G12	0.058	0.0205749	-0.795236	80_SSC	Patient	31	301	320	Peptid 31 - alternative	0.845	7.249	-0.0230898	0	1	0	1	0.95	0.95	Day A
9	H01	0.057	0.0193035	-0.797877	235_SSC	Patient	6	51	70	Peptid 6 - standard	1.495	6.332	-0.090825	0.15	0.85	0	0.8	0.9	0.9	Day A
9	H02	0.047	0.0065886	-0.833954	235_SSC	Patient	12	111	130	Peptid 12 - standard	1.155	6.161	-0.138536	0.75	0.25	0	0	1	1	Day A
9	H03	0.129	0.11085	-0.687458	235_SSC	Patient	18	171	190	Peptid 18 - standard	2.07	3.75	-1.18468	0.05	0.95	0	0.9	1	1	Day A
9	H04	0.138	0.122294	-0.677558	235_SSC	Patient	24	231	250	Peptid 24 - standard	0.505	10.134	3.02459	0	0.15	0.85	0.45	0.8	0.8	Day A
9	H05	0.064	0.0282039	-0.7811	235_SSC	Patient	30	291	310	Peptid 30 - standard	-0.43	9.299	1.0755	0.4	0.6	0	0.55	0.75	0.75	Day A
9	H06	0.062	0.0256609	-0.785536	235_SSC	Patient	36	351	370	Peptid 36 - standard	-1.26667	4.426	-1.08768	0	0	1	0	0	0	Day A
9	H07	0.095	0.0676199	-0.72928	80_SSC	Patient	6	51	70	Peptid 6 - standard	1.495	6.332	-0.090825	0.15	0.85	0	0.8	0.9	0.9	Day A
9	H08	0.078	0.0460046	-0.754843	80_SSC	Patient	12	111	130	Peptid 12 - standard	1.155	6.161	-0.138536	0.75	0.25	0	0	1	1	Day A
9	H09	0.069	0.0345613	-0.770906	80_SSC	Patient	18	171	190	Peptid 18 - standard	2.07	3.75	-1.18468	0.05	0.95	0	0.9	1	1	Day A
9	H10	0.184	0.180782	-0.631059	80_SSC	Patient	24	231	250	Peptid 24 - standard	0.505	10.134	3.02459	0	0.15	0.85	0.45	0.8	0.8	Day A
9	H11	0.132	0.114665	-0.684118	80_SSC	Patient	30	291	310	Peptid 30 - standard	-0.43	9.299	1.0755	0.4	0.6	0	0.55	0.75	0.75	Day A
9	H12	0.052	0.012946	-0.812978	80_SSC	Patient	36	351	370	Peptid 36 - standard	-1.26667	4.426	-1.08768	0	0	1	0	0	0	Day A
10	A01	0.048	0.00706826	-0.831993	412_SSC	NHS	7	61	80	Peptid 7 - alternative	2.035	6.1	-0.0908091	0	1	0	0.95	0.95	0.95	Day A
10	A02	0.064	0.0285168	-0.78057	412_SSC	NHS	7	61	80	Peptid 7 - standard	2.035	6.1	-0.0908091	0	1	0	0.95	0.95	0.95	Day A
10	A03	0.09	0.0633706	-0.733954	412_SSC	NHS	13	121	140	Peptid 13 - standard	1.06	8.523	0.858299	0.25	0.75	0	0.5	0.75	0.75	Day A
10	A04	0.06	0.0231546	-0.790161	412_SSC	NHS	19	181	200	Peptid 19 - standard	0.31	5.361	-1.7534	0.55	0.45	0	0.4	0.7	0.7	Day A
10	A05	0.433	0.523173	-0.393146	412_SSC	NHS	25	241	260	Peptid 25 - standard	0.845	13.102	4.90911	0	0.25	0.75	0.4	0.7	0.7	Day A
10	A06	0.081	0.0513058	-0.748108	412_SSC	NHS	31	301	320	Peptid 31 - standard	0.845	7.249	-0.0230898	0	1	0	1	0.95	0.95	Day A
10	A07	0.064	0.0285168	-0.78057	279_SSC	Patient	7	61	80	Peptid 7 - alternative	2.035	6.1	-0.0908091	0	1	0	0.95	0.95	0.95	Day A
10	A08	0.067	0.0325384	-0.774028	279_SSC	Patient	7	61	80	Peptid 7 - standard	2.035	6.1	-0.0908091	0	1	0	0.95	0.95	0.95	Day A
10	A09	0.066	0.0311978	-0.776156	279_SSC	Patient	13	121	140	Peptid 13 - standard	1.06	8.523	0.858299	0.25	0.75	0	0.5	0.75	0.75	Day A
10	A10	0.06	0.0231546	-0.790161	279_SSC	Patient	19	181	200	Peptid 19 - standard	0.31	5.361	-1.7534	0.55	0.45	0	0.4	0.7	0.7	Day A
10	A11	0.442	0.535238	-0.384632	279_SSC	Patient	25	241	260	Peptid 25 - standard	0.845	13.102	4.90911	0	0.25	0.75	0.4	0.7	0.7	Day A
10	A12	0.069	0.0352194	-0.769912	279_SSC	Patient	31	301	320	Peptid 31 - standard	0.845	7.249	-0.0230898	0	1	0	1	0.95	0.95	Day A
10	B01	0.534	0.658567	-0.294627	412_SSC	NHS	NA	NA	NA	Positive Control	NA	6.1	-0.0908091	NA	NA	NA	NA	NA	NA	Day A
10	B02	0.064	0.0285168	-0.78057	412_SSC	NHS	11	101	120	Peptid 11 - standard	1.625	3.75	-1.08923	0.5	0.5	0	0.45	1	1	Day A
10	B03	0.059	0.0218141	-0.792755	412_SSC	NHS	14	131	150	Peptid 14 - standard	0.895	6.155	-0.140134	0	0.85	0.15	1	0.75	0.75	Day A
10	B04	0.071	0.0379005	-0.765961	412_SSC	NHS	20	191	210	Peptid 20 - standard	-1.13	6.782	-0.637957	1	0	0	0	0.7	0.7	Day A
10	B05	0.127	0.11297	-0.685597	412_SSC	NHS	26	251	270	Peptid 26 - standard	1.85	10.526	1.86143	0	0.75	0.25	0.9	0.9	0.9	Day A
10	B06	0.267	0.300645	-0.545832	412_SSC	NHS	32	311	330	Peptid 32 - standard	0.5	8.798	1.81212	0	0.55	0.45	0.8	0.7	0.7	Day A
10	B07	0.667	0.836857	-0.151177	279_SSC	Patient	NA	NA	NA	Positive Control	NA	6.1	-0.0908091	NA	NA	NA	NA	NA	NA	Day A
10	B08	0.072	0.039241	-0.764041	279_SSC	Patient	11	101	120	Peptid 11 - standard	1.625	3.75	-1.08923	0.5	0.5	0	0.45	1	1	Day A
10	B09	0.091	0.0647111	-0.732465	279_SSC	Patient	14	131	150	Peptid 14 - standard	0.895	6.155	-0.140134	0	0.85	0.15	1	0.75	0.75	Day A
10	B10	0.069	0.0352194	-0.769912	279_SSC	Patient	20	191	210	Peptid 20 - standard	-1.13	6.782	-0.637957	1	0	0	0	0.7	0.7	Day A
10	B11	0.085	0.0566679	-0.741639	279_SSC	Patient	26	251	270	Peptid 26 - standard	1.85	10.526	1.86143	0	0.75	0.25	0.9	0.9	0.9	Day A
10	B12	0.118	0.100905	-0.696378	279_SSC	Patient	32	311	330	Peptid 32 - standard	0.5	8.798	1.81212	0	0.55	0.45	0.8	0.7	0.7	Day A
10	C01	0.047	0.00572773	-0.837727	412_SSC	NHS	1	1	20	Peptid 1 - standard	0.715	3.737	-3.91814	1	0	0	0	0.85	0.85	Day A
10	C02	0.055	0.016452	-0.804202	412_SSC	NHS	12	111	130	Peptid 12 - alternative	1.155	6.161	-0.138536	0.75	0.25	0	0	1	1	Day A
10	C03	0.066	0.0311978	-0.776156	412_SSC	NHS	15	141	160	Peptid 15 - alternative	0.75	7.353	0.0262035	0	0.35	0.65	0.65	0.95	0.95	Day A
10	C04	0.146	0.13844	-0.664127	412_SSC	NHS	21	201	220	Peptid 21 - standard	-0.2	9.501	2.02619	0.6	0.4	0	0.25	1	1	Day A
10	C05	0.088	0.0606895	-0.736979	412_SSC	NHS	27	261	280	Peptid 27 - standard	1.92	5.29	-0.972198	0.15	0.85	0	0.85	1	1	Day A
10	C06	0.281	0.319412	-0.532988	412_SSC	NHS	33	321	340	Peptid 33 - standard	0.25	11.38	2.86142	0	0.05	0.95	0.3	0.65	0.65	Day A
10	C07	0.063	0.0271762	-0.782864	279_SSC	Patient	1	1	20	Peptid 1 - standard	0.715	3.737	-3.91814	1	0	0	0	0.85	0.85	Day A
10	C08	0.09	0.0633706	-0.733954	279_SSC	Patient	12	111	130	Peptid 12 - alternative	1.155	6.161	-0.138536	0.75	0.25	0	0	1	1	Day A
10	C09	0.086	0.0580085	-0.740068	279_SSC	Patient	15	141	160	Peptid 15 - alternative	0.75	7.353	0.0262035	0	0.35	0.65	0.65	0.95	0.95	Day A
10	C10	0.127	0.11297	-0.685597	279_SSC	Patient	21	201	220	Peptid 21 - standard	-0.2	9.501	2.02619	0.6	0.4	0	0.25	1	1	Day A
10	C11	0.113	0.0942028	-0.702585	279_SSC	Patient	27	261	280	Peptid 27 - standard	1.92	5.29	-0.972198	0.15	0.85	0	0.85	1	1	Day A
10	C12	0.185	0.190721	-0.623628	279_SSC	Patient	33	321	340	Peptid 33 - standard	0.25	11.38	2.86142	0	0.05	0.95	0.3	0.65	0.65	Day A
10	D01	0.051	0.0110899	-0.818239	412_SSC	NHS	2	11	30	Peptid 2 - standard	-0.13	3.295	-4.08764	1	0	0	0	0.65	0.65	Day A
10	D02	0.069	0.0352194	-0.769912	412_SSC	NHS	8	71	90	Peptid 8 - standard	0.305	10.398	0.910742	0	0.55	0.45	0.6	0.9	0.9	Day A
10	D03	0.174	0.175975	-0.634691	412_SSC	NHS	16	151	170	Peptid 16 - alternative	-0.105	12.204	3.0739	0	0.05	0.95	0.35	0.75	0.75	Day A
10	D04	0.075	0.0432626	-0.758481	412_SSC	NHS	17	161	180	Peptid 17 - alternative	0.62	10.518	2.81369	0	0.55	0.45	0.7	0.8	0.8	Day A
10	D05	0.059	0.0218141	-0.792755	412_SSC	NHS	28	271	290	Peptid 28 - standard	1.21	5.406	-0.970632	0.65	0.35	0	0.35	0.95	0.95	Day A
10	D06	0.7	0.881095	-0.112366	412_SSC	NHS	34	331	350	Peptid 34 - standard	-0.485	12.199	2.86142	0	0	1	0	0.45	0.45	Day A
10	D07	0.072	0.039241	-0.764041	279_SSC	Patient	2	11	30	Peptid 2 - standard	-0.13	3.295	-4.08764	1	0	0	0	0.65	0.65	Day A
10	D08	0.068	0.0338789	-0.771948	279_SSC	Patient	8	71	90	Peptid 8 - standard	0.305	10.398	0.910742	0	0.55	0.45	0.6	0.9	0.9	Day A
10	D09	0.102	0.079457	-0.716918	279_SSC	Patient	16	151	170	Peptid 16 - alternative	-0.105	12.204	3.0739	0	0.05	0.95	0.35	0.75	0.75	Day A
10	D10	0.072	0.039241	-0.764041	279_SSC	Patient	17	161	180	Peptid 17 - alternative	0.62	10.518	2.81369	0	0.55	0.45	0.7	0.8	0.8	Day A
10	D11	0.085	0.0566679	-0.741639	279_SSC	Patient	28	271	290	Peptid 28 - standard	1.21	5.406	-0.970632	0.65	0.35	0	0.35	0.95	0.95	Day A
10	D12	0.717	0.903884	-0.0917796	279_SSC	Patient	34	331	350	Peptid 34 - standard	-0.485	12.199	2.86142	0	0	1	0	0.45	0.45	Day A
10	E01	0.055	0.016452	-0.804202	412_SSC	NHS	3	21	40	Peptid 3 - standard	-1.26	3.226	-5.18152	1	0	0	0	0.45	0.45	Day A
10	E02	0.265	0.297964	-0.547672	412_SSC	NHS	9	81	100	Peptid 9 - standard	0.2	7.552	0.0786615	0	0.55	0.45	0.65	0.9	0.9	Day A
10	E03	0.092	0.0660516	-0.730989	412_SSC	NHS	15	141	160	Peptid 15 - standard	0.75	7.353	0.0262035	0	0.35	0.65	0.65	0.95	0.95	Day A
10	E04	0.057	0.019133	-0.798238	412_SSC	NHS	23	221	240	Peptid 23 - alternative	1.925	7.352	0.0246369	0	0.65	0.35	0.95	1	1	Day A
10	E05	0.181	0.185359	-0.627624	412_SSC	NHS	24	231	250	Peptid 24 - alternative	0.505	10.134	3.02459	0	0.15	0.85	0.45	0.8	0.8	Day A
10	E06	0.124	0.108949	-0.68914	412_SSC	NHS	35	341	360	Peptid 35 - standard	-2.005	12.023	1.91229	0	0	1	0	0	0	Day A
10	E07	0.07	0.03656	-0.767917	279_SSC	Patient	3	21	40	Peptid 3 - standard	-1.26	3.226	-5.18152	1	0	0	0	0.45	0.45	Day A
10	E08	0.085	0.0566679	-0.741639	279_SSC	Patient	9	81	100	Peptid 9 - standard	0.2	7.552	0.0786615	0	0.55	0.45	0.65	0.9	0.9	Day A
10	E09	0.089	0.0620301	-0.735459	279_SSC	Patient	15	141	160	Peptid 15 - standard	0.75	7.353	0.0262035	0	0.35	0.65	0.65	0.95	0.95	Day A
10	E10	0.063	0.0271762	-0.782864	279_SSC	Patient	23	221	240	Peptid 23 - alternative	1.925	7.352	0.0246369	0	0.65	0.35	0.95	1	1	Day A
10	E11	0.129	0.115651	-0.683261	279_SSC	Patient	24	231	250	Peptid 24 - alternative	0.505	10.134	3.02459	0	0.15	0.85	0.45	0.8	0.8	Day A
10	E12	0.073	0.0405815	-0.762156	279_SSC	Patient	35	341	360	Peptid 35 - standard	-2.005	12.023	1.91229	0	0	1	0	0	0	Day A
10	F01	0.054	0.0151114	-0.807407	412_SSC	NHS	4	31	50	Peptid 4 - standard	-0.955	3.295	-4.22766	1	0	0	0	0.7	0.7	Day A
10	F02	0.502	0.61567	-0.32662	412_SSC	NHS	10	91	110	Peptid 10 - standard	1.82	5.292	-0.922889	0	1	0	0.95	1	1	Day A
10	F03	0.132	0.119673	-0.679794	412_SSC	NHS	16	151	170	Peptid 16 - standard	-0.105	12.204	3.0739	0	0.05	0.95	0.35	0.75	0.75	Day A
10	F04	0.09	0.0633706	-0.733954	412_SSC	NHS	22	211	230	Peptid 22 - standard	1.5	12.5	1.90916	0.1	0.9	0	0.75	1	1	Day A
10	F05	0.072	0.039241	-0.764041	412_SSC	NHS	26	251	270	Peptid 26 - alternative	1.85	10.526	1.86143	0	0.75	0.25	0.9	0.9	0.9	Day A
10	F06	0.07	0.03656	-0.767917	412_SSC	NHS	NK	NA	NA	Negative Control	NA	6.1	-0.0908091	NA	NA	NA	NA	NA	NA	Day A
10	F07	0.078	0.0472842	-0.753183	279_SSC	Patient	4	31	50	Peptid 4 - standard	-0.955	3.295	-4.22766	1	0	0	0	0.7	0.7	Day A
10	F08	0.062	0.0258357	-0.785223	279_SSC	Patient	10	91	110	Peptid 10 - standard	1.82	5.292	-0.922889	0	1	0	0.95	1	1	Day A
10	F09	0.085	0.0566679	-0.741639	279_SSC	Patient	16	151	170	Peptid 16 - standard	-0.105	12.204	3.0739	0	0.05	0.95	0.35	0.75	0.75	Day A
10	F10	0.059	0.0218141	-0.792755	279_SSC	Patient	22	211	230	Peptid 22 - standard	1.5	12.5	1.90916	0.1	0.9	0	0.75	1	1	Day A
10	F11	0.076	0.0446031	-0.756688	279_SSC	Patient	26	251	270	Peptid 26 - alternative	1.85	10.526	1.86143	0	0.75	0.25	0.9	0.9	0.9	Day A
10	F12	0.051	0.0110899	-0.818239	279_SSC	Patient	NK	NA	NA	Negative Control	NA	6.1	-0.0908091	NA	NA	NA	NA	NA	NA	Day A
10	G01	0.079	0.0486247	-0.751468	412_SSC	NHS	5	41	60	Peptid 5 - standard	-0.055	4.109	-1.13697	0.65	0.35	0	0.3	0.85	0.85	Day A
10	G02	0.065	0.0298573	-0.778336	412_SSC	NHS	11	101	120	Peptid 11 - standard	1.625	3.75	-1.08923	0.5	0.5	0	0.45	1	1	Day A
10	G03	0.266	0.299304	-0.546751	412_SSC	NHS	17	161	180	Peptid 17 - standard	0.62	10.518	2.81369	0	0.55	0.45	0.7	0.8	0.8	Day A
10	G04	0.071	0.0379005	-0.765961	412_SSC	NHS	23	221	240	Peptid 23 - standard	1.925	7.352	0.0246369	0	0.65	0.35	0.95	1	1	Day A
10	G05	0.103	0.0807975	-0.71557	412_SSC	NHS	29	281	300	Peptid 29 - standard	-0.36	8.545	0.864581	0.9	0.1	0	0.05	0.75	0.75	Day A
10	G06	0.064	0.0285168	-0.78057	412_SSC	NHS	31	301	320	Peptid 31 - alternative	0.845	7.249	-0.0230898	0	1	0	1	0.95	0.95	Day A
10	G07	0.16	0.157208	-0.649146	279_SSC	Patient	5	41	60	Peptid 5 - standard	-0.055	4.109	-1.13697	0.65	0.35	0	0.3	0.85	0.85	Day A
10	G08	0.061	0.0244952	-0.787653	279_SSC	Patient	11	101	120	Peptid 11 - standard	1.625	3.75	-1.08923	0.5	0.5	0	0.45	1	1	Day A
10	G09	0.214	0.229597	-0.595376	279_SSC	Patient	17	161	180	Peptid 17 - standard	0.62	10.518	2.81369	0	0.55	0.45	0.7	0.8	0.8	Day A
10	G10	0.081	0.0513058	-0.748108	279_SSC	Patient	23	221	240	Peptid 23 - standard	1.925	7.352	0.0246369	0	0.65	0.35	0.95	1	1	Day A
10	G11	0.066	0.0311978	-0.776156	279_SSC	Patient	29	281	300	Peptid 29 - standard	-0.36	8.545	0.864581	0.9	0.1	0	0.05	0.75	0.75	Day A
10	G12	0.07	0.03656	-0.767917	279_SSC	Patient	31	301	320	Peptid 31 - alternative	0.845	7.249	-0.0230898	0	1	0	1	0.95	0.95	Day A
10	H01	0.061	0.0244952	-0.787653	412_SSC	NHS	6	51	70	Peptid 6 - standard	1.495	6.332	-0.090825	0.15	0.85	0	0.8	0.9	0.9	Day A
10	H02	0.088	0.0606895	-0.736979	412_SSC	NHS	12	111	130	Peptid 12 - standard	1.155	6.161	-0.138536	0.75	0.25	0	0	1	1	Day A
10	H03	0.071	0.0379005	-0.765961	412_SSC	NHS	18	171	190	Peptid 18 - standard	2.07	3.75	-1.18468	0.05	0.95	0	0.9	1	1	Day A
10	H04	0.303	0.348904	-0.512898	412_SSC	NHS	24	231	250	Peptid 24 - standard	0.505	10.134	3.02459	0	0.15	0.85	0.45	0.8	0.8	Day A
10	H05	0.083	0.0539869	-0.744834	412_SSC	NHS	30	291	310	Peptid 30 - standard	-0.43	9.299	1.0755	0.4	0.6	0	0.55	0.75	0.75	Day A
10	H06	0.065	0.0298573	-0.778336	412_SSC	NHS	36	351	370	Peptid 36 - standard	-1.26667	4.426	-1.08768	0	0	1	0	0	0	Day A
10	H07	0.058	0.0204736	-0.795443	279_SSC	Patient	6	51	70	Peptid 6 - standard	1.495	6.332	-0.090825	0.15	0.85	0	0.8	0.9	0.9	Day A
10	H08	0.079	0.0486247	-0.751468	279_SSC	Patient	12	111	130	Peptid 12 - standard	1.155	6.161	-0.138536	0.75	0.25	0	0	1	1	Day A
10	H09	0.064	0.0285168	-0.78057	279_SSC	Patient	18	171	190	Peptid 18 - standard	2.07	3.75	-1.18468	0.05	0.95	0	0.9	1	1	Day A
10	H10	0.312	0.360969	-0.504697	279_SSC	Patient	24	231	250	Peptid 24 - standard	0.505	10.134	3.02459	0	0.15	0.85	0.45	0.8	0.8	Day A
10	H11	0.068	0.0338789	-0.771948	279_SSC	Patient	30	291	310	Peptid 30 - standard	-0.43	9.299	1.0755	0.4	0.6	0	0.55	0.75	0.75	Day A
10	H12	0.057	0.019133	-0.798238	279_SSC	Patient	36	351	370	Peptid 36 - standard	-1.26667	4.426	-1.08768	0	0	1	0	0	0	Day A
11	A01	0.049	0.00711486	-0.831808	79/17_NK	NHS	7	61	80	Peptid 7 - alternative	2.035	6.1	-0.0908091	0	1	0	0.95	0.95	0.95	Day B
11	A02	0.052	0.0110944	-0.818225	79/17_NK	NHS	7	61	80	Peptid 7 - standard	2.035	6.1	-0.0908091	0	1	0	0.95	0.95	0.95	Day B
11	A03	0.244	0.265782	-0.569907	79/17_NK	NHS	13	121	140	Peptid 13 - standard	1.06	8.523	0.858299	0.25	0.75	0	0.5	0.75	0.75	Day B
11	A04	0.068	0.0323184	-0.774374	79/17_NK	NHS	19	181	200	Peptid 19 - standard	0.31	5.361	-1.7534	0.55	0.45	0	0.4	0.7	0.7	Day B
11	A05	0.085	0.0548689	-0.743774	79/17_NK	NHS	25	241	260	Peptid 25 - standard	0.845	13.102	4.90911	0	0.25	0.75	0.4	0.7	0.7	Day B
11	A06	0.162	0.157009	-0.649301	79/17_NK	NHS	31	301	320	Peptid 31 - standard	0.845	7.249	-0.0230898	0	1	0	1	0.95	0.95	Day B
11	A07	0.092	0.0641544	-0.733082	279_SSC	Patient	7	61	80	Peptid 7 - alternative	2.035	6.1	-0.0908091	0	1	0	0.95	0.95	0.95	Day B
11	A08	0.106	0.0827254	-0.71365	279_SSC	Patient	7	61	80	Peptid 7 - standard	2.035	6.1	-0.0908091	0	1	0	0.95	0.95	0.95	Day B
11	A09	0.199	0.20609	-0.612319	279_SSC	Patient	13	121	140	Peptid 13 - standard	1.06	8.523	0.858299	0.25	0.75	0	0.5	0.75	0.75	Day B
11	A10	0.092	0.0641544	-0.733082	279_SSC	Patient	19	181	200	Peptid 19 - standard	0.31	5.361	-1.7534	0.55	0.45	0	0.4	0.7	0.7	Day B
11	A11	0.118	0.0986434	-0.698454	279_SSC	Patient	25	241	260	Peptid 25 - standard	0.845	13.102	4.90911	0	0.25	0.75	0.4	0.7	0.7	Day B
11	A12	0.099	0.0734399	-0.723091	279_SSC	Patient	31	301	320	Peptid 31 - standard	0.845	7.249	-0.0230898	0	1	0	1	0.95	0.95	Day B
11	B01	0.086	0.0561954	-0.742196	79/17_NK	NHS	NA	NA	NA	Positive Control	NA	6.1	-0.0908091	NA	NA	NA	NA	NA	NA	Day B
11	B02	0.066	0.0296654	-0.778652	79/17_NK	NHS	11	101	120	Peptid 11 - standard	1.625	3.75	-1.08923	0.5	0.5	0	0.45	1	1	Day B
11	B03	0.109	0.0867049	-0.709745	79/17_NK	NHS	14	131	150	Peptid 14 - standard	0.895	6.155	-0.140134	0	0.85	0.15	1	0.75	0.75	Day B
11	B04	0.579	0.71016	-0.254991	79/17_NK	NHS	20	191	210	Peptid 20 - standard	-1.13	6.782	-0.637957	1	0	0	0	0.7	0.7	Day B
11	B05	0.056	0.0164004	-0.804323	79/17_NK	NHS	26	251	270	Peptid 26 - standard	1.85	10.526	1.86143	0	0.75	0.25	0.9	0.9	0.9	Day B
11	B06	0.053	0.0124209	-0.814415	79/17_NK	NHS	32	311	330	Peptid 32 - standard	0.5	8.798	1.81212	0	0.55	0.45	0.8	0.7	0.7	Day B
11	B07	0.107	0.0840519	-0.71234	279_SSC	Patient	NA	NA	NA	Positive Control	NA	6.1	-0.0908091	NA	NA	NA	NA	NA	NA	Day B
11	B08	0.1	0.0747664	-0.721711	279_SSC	Patient	11	101	120	Peptid 11 - standard	1.625	3.75	-1.08923	0.5	0.5	0	0.45	1	1	Day B
11	B09	0.116	0.0959904	-0.700913	279_SSC	Patient	14	131	150	Peptid 14 - standard	0.895	6.155	-0.140134	0	0.85	0.15	1	0.75	0.75	Day B
11	B10	0.473	0.569551	-0.360167	279_SSC	Patient	20	191	210	Peptid 20 - standard	-1.13	6.782	-0.637957	1	0	0	0	0.7	0.7	Day B
11	B11	0.098	0.0721134	-0.724481	279_SSC	Patient	26	251	270	Peptid 26 - standard	1.85	10.526	1.86143	0	0.75	0.25	0.9	0.9	0.9	Day B
11	B12	0.178	0.178233	-0.632982	279_SSC	Patient	32	311	330	Peptid 32 - standard	0.5	8.798	1.81212	0	0.55	0.45	0.8	0.7	0.7	Day B
11	C01	0.054	0.0137474	-0.810854	79/17_NK	NHS	1	1	20	Peptid 1 - standard	0.715	3.737	-3.91814	1	0	0	0	0.85	0.85	Day B
11	C02	0.07	0.0349714	-0.770285	79/17_NK	NHS	12	111	130	Peptid 12 - alternative	1.155	6.161	-0.138536	0.75	0.25	0	0	1	1	Day B
11	C03	0.052	0.0110944	-0.818225	79/17_NK	NHS	15	141	160	Peptid 15 - alternative	0.75	7.353	0.0262035	0	0.35	0.65	0.65	0.95	0.95	Day B
11	C04	0.106	0.0827254	-0.71365	79/17_NK	NHS	21	201	220	Peptid 21 - standard	-0.2	9.501	2.02619	0.6	0.4	0	0.25	1	1	Day B
11	C05	0.067	0.0309919	-0.776488	79/17_NK	NHS	27	261	280	Peptid 27 - standard	1.92	5.29	-0.972198	0.15	0.85	0	0.85	1	1	Day B
11	C06	0.063	0.0256859	-0.785491	79/17_NK	NHS	33	321	340	Peptid 33 - standard	0.25	11.38	2.86142	0	0.05	0.95	0.3	0.65	0.65	Day B
11	C07	0.101	0.0760929	-0.720342	279_SSC	Patient	1	1	20	Peptid 1 - standard	0.715	3.737	-3.91814	1	0	0	0	0.85	0.85	Day B
11	C08	0.099	0.0734399	-0.723091	279_SSC	Patient	12	111	130	Peptid 12 - alternative	1.155	6.161	-0.138536	0.75	0.25	0	0	1	1	Day B
11	C09	0.093	0.0654809	-0.731615	279_SSC	Patient	15	141	160	Peptid 15 - alternative	0.75	7.353	0.0262035	0	0.35	0.65	0.65	0.95	0.95	Day B
11	C10	0.116	0.0959904	-0.700913	279_SSC	Patient	21	201	220	Peptid 21 - standard	-0.2	9.501	2.02619	0.6	0.4	0	0.25	1	1	Day B
11	C11	0.108	0.0853784	-0.711038	279_SSC	Patient	27	261	280	Peptid 27 - standard	1.92	5.29	-0.972198	0.15	0.85	0	0.85	1	1	Day B
11	C12	0.09	0.0615014	-0.736057	279_SSC	Patient	33	321	340	Peptid 33 - standard	0.25	11.38	2.86142	0	0.05	0.95	0.3	0.65	0.65	Day B
11	D01	0.081	0.0495629	-0.750282	79/17_NK	NHS	2	11	30	Peptid 2 - standard	-0.13	3.295	-4.08764	1	0	0	0	0.65	0.65	Day B
11	D02	0.053	0.0124209	-0.814415	79/17_NK	NHS	8	71	90	Peptid 8 - standard	0.305	10.398	0.910742	0	0.55	0.45	0.6	0.9	0.9	Day B
11	D03	0.054	0.0137474	-0.810854	79/17_NK	NHS	16	151	170	Peptid 16 - alternative	-0.105	12.204	3.0739	0	0.05	0.95	0.35	0.75	0.75	Day B
11	D04	0.118	0.0986434	-0.698454	79/17_NK	NHS	17	161	180	Peptid 17 - alternative	0.62	10.518	2.81369	0	0.55	0.45	0.7	0.8	0.8	Day B
11	D05	0.218	0.231293	-0.594167	79/17_NK	NHS	28	271	290	Peptid 28 - standard	1.21	5.406	-0.970632	0.65	0.35	0	0.35	0.95	0.95	Day B
11	D06	0.073	0.0389509	-0.764454	79/17_NK	NHS	34	331	350	Peptid 34 - standard	-0.485	12.199	2.86142	0	0	1	0	0.45	0.45	Day B
11	D07	0.117	0.0973169	-0.69968	279_SSC	Patient	2	11	30	Peptid 2 - standard	-0.13	3.295	-4.08764	1	0	0	0	0.65	0.65	Day B
11	D08	0.1	0.0747664	-0.721711	279_SSC	Patient	8	71	90	Peptid 8 - standard	0.305	10.398	0.910742	0	0.55	0.45	0.6	0.9	0.9	Day B
11	D09	0.098	0.0721134	-0.724481	279_SSC	Patient	16	151	170	Peptid 16 - alternative	-0.105	12.204	3.0739	0	0.05	0.95	0.35	0.75	0.75	Day B
11	D10	0.146	0.135785	-0.666297	279_SSC	Patient	17	161	180	Peptid 17 - alternative	0.62	10.518	2.81369	0	0.55	0.45	0.7	0.8	0.8	Day B
11	D11	0.179	0.17956	-0.63198	279_SSC	Patient	28	271	290	Peptid 28 - standard	1.21	5.406	-0.970632	0.65	0.35	0	0.35	0.95	0.95	Day B
11	D12	0.095	0.0681339	-0.728724	279_SSC	Patient	34	331	350	Peptid 34 - standard	-0.485	12.199	2.86142	0	0	1	0	0.45	0.45	Day B
11	E01	0.237	0.256497	-0.576386	79/17_NK	NHS	3	21	40	Peptid 3 - standard	-1.26	3.226	-5.18152	1	0	0	0	0.45	0.45	Day B
11	E02	0.086	0.0561954	-0.742196	79/17_NK	NHS	9	81	100	Peptid 9 - standard	0.2	7.552	0.0786615	0	0.55	0.45	0.65	0.9	0.9	Day B
11	E03	0.059	0.0203799	-0.795635	79/17_NK	NHS	15	141	160	Peptid 15 - standard	0.75	7.353	0.0262035	0	0.35	0.65	0.65	0.95	0.95	Day B
11	E04	0.122	0.103949	-0.693614	79/17_NK	NHS	23	221	240	Peptid 23 - alternative	1.925	7.352	0.0246369	0	0.65	0.35	0.95	1	1	Day B
11	E05	0.051	0.00976786	-0.822338	79/17_NK	NHS	24	231	250	Peptid 24 - alternative	0.505	10.134	3.02459	0	0.15	0.85	0.45	0.8	0.8	Day B
11	E06	0.048	0.00578836	-0.837449	79/17_NK	NHS	35	341	360	Peptid 35 - standard	-2.005	12.023	1.91229	0	0	1	0	0	0	Day B
11	E07	0.148	0.138438	-0.664129	279_SSC	Patient	3	21	40	Peptid 3 - standard	-1.26	3.226	-5.18152	1	0	0	0	0.45	0.45	Day B
11	E08	0.092	0.0641544	-0.733082	279_SSC	Patient	9	81	100	Peptid 9 - standard	0.2	7.552	0.0786615	0	0.55	0.45	0.65	0.9	0.9	Day B
11	E09	0.09	0.0615014	-0.736057	279_SSC	Patient	15	141	160	Peptid 15 - standard	0.75	7.353	0.0262035	0	0.35	0.65	0.65	0.95	0.95	Day B
11	E10	0.129	0.113235	-0.685366	279_SSC	Patient	23	221	240	Peptid 23 - alternative	1.925	7.352	0.0246369	0	0.65	0.35	0.95	1	1	Day B
11	E11	0.096	0.0694604	-0.727297	279_SSC	Patient	24	231	250	Peptid 24 - alternative	0.505	10.134	3.02459	0	0.15	0.85	0.45	0.8	0.8	Day B
11	E12	0.119	0.0999699	-0.697235	279_SSC	Patient	35	341	360	Peptid 35 - standard	-2.005	12.023	1.91229	0	0	1	0	0	0	Day B
11	F01	0.725	0.903829	-0.0918299	79/17_NK	NHS	4	31	50	Peptid 4 - standard	-0.955	3.295	-4.22766	1	0	0	0	0.7	0.7	Day B
11	F02	0.062	0.0243594	-0.787904	79/17_NK	NHS	10	91	110	Peptid 10 - standard	1.82	5.292	-0.922889	0	1	0	0.95	1	1	Day B
11	F03	0.089	0.0601749	-0.737567	79/17_NK	NHS	16	151	170	Peptid 16 - standard	-0.105	12.204	3.0739	0	0.05	0.95	0.35	0.75	0.75	Day B
11	F04	0.07	0.0349714	-0.770285	79/17_NK	NHS	22	211	230	Peptid 22 - standard	1.5	12.5	1.90916	0.1	0.9	0	0.75	1	1	Day B
11	F05	0.054	0.0137474	-0.810854	79/17_NK	NHS	26	251	270	Peptid 26 - alternative	1.85	10.526	1.86143	0	0.75	0.25	0.9	0.9	0.9	Day B
11	F06	0.049	0.00711486	-0.831808	79/17_NK	NHS	NK	NA	NA	Negative Control	NA	6.1	-0.0908091	NA	NA	NA	NA	NA	NA	Day B
11	F07	0.532	0.647814	-0.302723	279_SSC	Patient	4	31	50	Peptid 4 - standard	-0.955	3.295	-4.22766	1	0	0	0	0.7	0.7	Day B
11	F08	0.092	0.0641544	-0.733082	279_SSC	Patient	10	91	110	Peptid 10 - standard	1.82	5.292	-0.922889	0	1	0	0.95	1	1	Day B
11	F09	0.096	0.0694604	-0.727297	279_SSC	Patient	16	151	170	Peptid 16 - standard	-0.105	12.204	3.0739	0	0.05	0.95	0.35	0.75	0.75	Day B
11	F10	0.101	0.0760929	-0.720342	279_SSC	Patient	22	211	230	Peptid 22 - standard	1.5	12.5	1.90916	0.1	0.9	0	0.75	1	1	Day B
11	F11	0.104	0.0800724	-0.716298	279_SSC	Patient	26	251	270	Peptid 26 - alternative	1.85	10.526	1.86143	0	0.75	0.25	0.9	0.9	0.9	Day B
11	F12	0.071	0.0362979	-0.768304	279_SSC	Patient	NK	NA	NA	Negative Control	NA	6.1	-0.0908091	NA	NA	NA	NA	NA	NA	Day B
11	G01	0.121	0.102623	-0.694814	79/17_NK	NHS	5	41	60	Peptid 5 - standard	-0.055	4.109	-1.13697	0.65	0.35	0	0.3	0.85	0.85	Day B
11	G02	0.096	0.0694604	-0.727297	79/17_NK	NHS	11	101	120	Peptid 11 - standard	1.625	3.75	-1.08923	0.5	0.5	0	0.45	1	1	Day B
11	G03	0.051	0.00976786	-0.822338	79/17_NK	NHS	17	161	180	Peptid 17 - standard	0.62	10.518	2.81369	0	0.55	0.45	0.7	0.8	0.8	Day B
11	G04	0.055	0.0150739	-0.8075	79/17_NK	NHS	23	221	240	Peptid 23 - standard	1.925	7.352	0.0246369	0	0.65	0.35	0.95	1	1	Day B
11	G05	0.055	0.0150739	-0.8075	79/17_NK	NHS	29	281	300	Peptid 29 - standard	-0.36	8.545	0.864581	0.9	0.1	0	0.05	0.75	0.75	Day B
11	G06	0.177	0.176907	-0.633985	79/17_NK	NHS	31	301	320	Peptid 31 - alternative	0.845	7.249	-0.0230898	0	1	0	1	0.95	0.95	Day B
11	G07	0.186	0.188845	-0.625023	279_SSC	Patient	5	41	60	Peptid 5 - standard	-0.055	4.109	-1.13697	0.65	0.35	0	0.3	0.85	0.85	Day B
11	G08	0.098	0.0721134	-0.724481	279_SSC	Patient	11	101	120	Peptid 11 - standard	1.625	3.75	-1.08923	0.5	0.5	0	0.45	1	1	Day B
11	G09	0.069	0.0336449	-0.772308	279_SSC	Patient	17	161	180	Peptid 17 - standard	0.62	10.518	2.81369	0	0.55	0.45	0.7	0.8	0.8	Day B
11	G10	0.093	0.0654809	-0.731615	279_SSC	Patient	23	221	240	Peptid 23 - standard	1.925	7.352	0.0246369	0	0.65	0.35	0.95	1	1	Day B
11	G11	0.082	0.0508894	-0.748624	279_SSC	Patient	29	281	300	Peptid 29 - standard	-0.36	8.545	0.864581	0.9	0.1	0	0.05	0.75	0.75	Day B
11	G12	0.256	0.2817	-0.558871	279_SSC	Patient	31	301	320	Peptid 31 - alternative	0.845	7.249	-0.0230898	0	1	0	1	0.95	0.95	Day B
11	H01	0.099	0.0734399	-0.723091	79/17_NK	NHS	6	51	70	Peptid 6 - standard	1.495	6.332	-0.090825	0.15	0.85	0	0.8	0.9	0.9	Day B
11	H02	0.187	0.190172	-0.624036	79/17_NK	NHS	12	111	130	Peptid 12 - standard	1.155	6.161	-0.138536	0.75	0.25	0	0	1	1	Day B
11	H03	0.106	0.0827254	-0.71365	79/17_NK	NHS	18	171	190	Peptid 18 - standard	2.07	3.75	-1.18468	0.05	0.95	0	0.9	1	1	Day B
11	H04	0.054	0.0137474	-0.810854	79/17_NK	NHS	24	231	250	Peptid 24 - standard	0.505	10.134	3.02459	0	0.15	0.85	0.45	0.8	0.8	Day B
11	H05	0.062	0.0243594	-0.787904	79/17_NK	NHS	30	291	310	Peptid 30 - standard	-0.43	9.299	1.0755	0.4	0.6	0	0.55	0.75	0.75	Day B
11	H06	0.053	0.0124209	-0.814415	79/17_NK	NHS	36	351	370	Peptid 36 - standard	-1.26667	4.426	-1.08768	0	0	1	0	0	0	Day B
11	H07	0.157	0.150377	-0.65453	279_SSC	Patient	6	51	70	Peptid 6 - standard	1.495	6.332	-0.090825	0.15	0.85	0	0.8	0.9	0.9	Day B
11	H08	0.123	0.105276	-0.692419	279_SSC	Patient	12	111	130	Peptid 12 - standard	1.155	6.161	-0.138536	0.75	0.25	0	0	1	1	Day B
11	H09	0.122	0.103949	-0.693614	279_SSC	Patient	18	171	190	Peptid 18 - standard	2.07	3.75	-1.18468	0.05	0.95	0	0.9	1	1	Day B
11	H10	0.089	0.0601749	-0.737567	279_SSC	Patient	24	231	250	Peptid 24 - standard	0.505	10.134	3.02459	0	0.15	0.85	0.45	0.8	0.8	Day B
11	H11	0.085	0.0548689	-0.743774	279_SSC	Patient	30	291	310	Peptid 30 - standard	-0.43	9.299	1.0755	0.4	0.6	0	0.55	0.75	0.75	Day B
11	H12	0.087	0.0575219	-0.740636	279_SSC	Patient	36	351	370	Peptid 36 - standard	-1.26667	4.426	-1.08768	0	0	1	0	0	0	Day B
12	A01	0.058	0.0268898	-0.783363	31/16_NK	NHS	7	61	80	Peptid 7 - alternative	2.035	6.1	-0.0908091	0	1	0	0.95	0.95	0.95	Day B
12	A02	0.056	0.0237431	-0.78905	31/16_NK	NHS	7	61	80	Peptid 7 - standard	2.035	6.1	-0.0908091	0	1	0	0.95	0.95	0.95	Day B
12	A03	0.188	0.231424	-0.594074	31/16_NK	NHS	13	121	140	Peptid 13 - standard	1.06	8.523	0.858299	0.25	0.75	0	0.5	0.75	0.75	Day B
12	A04	0.049	0.0127297	-0.813565	31/16_NK	NHS	19	181	200	Peptid 19 - standard	0.31	5.361	-1.7534	0.55	0.45	0	0.4	0.7	0.7	Day B
12	A05	0.067	0.0410498	-0.761505	31/16_NK	NHS	25	241	260	Peptid 25 - standard	0.845	13.102	4.90911	0	0.25	0.75	0.4	0.7	0.7	Day B
12	A06	0.051	0.0158764	-0.805558	31/16_NK	NHS	31	301	320	Peptid 31 - standard	0.845	7.249	-0.0230898	0	1	0	1	0.95	0.95	Day B
12	A07	0.047	0.00958306	-0.822939	384_SSC	Patient	7	61	80	Peptid 7 - alternative	2.035	6.1	-0.0908091	0	1	0	0.95	0.95	0.95	Day B
12	A08	0.046	0.00800973	-0.828388	384_SSC	Patient	7	61	80	Peptid 7 - standard	2.035	6.1	-0.0908091	0	1	0	0.95	0.95	0.95	Day B
12	A09	0.176	0.212544	-0.607629	384_SSC	Patient	13	121	140	Peptid 13 - standard	1.06	8.523	0.858299	0.25	0.75	0	0.5	0.75	0.75	Day B
12	A10	0.057	0.0253165	-0.786156	384_SSC	Patient	19	181	200	Peptid 19 - standard	0.31	5.361	-1.7534	0.55	0.45	0	0.4	0.7	0.7	Day B
12	A11	0.084	0.0677966	-0.729089	384_SSC	Patient	25	241	260	Peptid 25 - standard	0.845	13.102	4.90911	0	0.25	0.75	0.4	0.7	0.7	Day B
12	A12	0.047	0.00958306	-0.822939	384_SSC	Patient	31	301	320	Peptid 31 - standard	0.845	7.249	-0.0230898	0	1	0	1	0.95	0.95	Day B
12	B01	0.077	0.0567832	-0.741503	31/16_NK	NHS	NA	NA	NA	Positive Control	NA	6.1	-0.0908091	NA	NA	NA	NA	NA	NA	Day B
12	B02	0.05	0.0143031	-0.809425	31/16_NK	NHS	11	101	120	Peptid 11 - standard	1.625	3.75	-1.08923	0.5	0.5	0	0.45	1	1	Day B
12	B03	0.154	0.17793	-0.633211	31/16_NK	NHS	14	131	150	Peptid 14 - standard	0.895	6.155	-0.140134	0	0.85	0.15	1	0.75	0.75	Day B
12	B04	0.288	0.388758	-0.485808	31/16_NK	NHS	20	191	210	Peptid 20 - standard	-1.13	6.782	-0.637957	1	0	0	0	0.7	0.7	Day B
12	B05	0.257	0.339984	-0.518966	31/16_NK	NHS	26	251	270	Peptid 26 - standard	1.85	10.526	1.86143	0	0.75	0.25	0.9	0.9	0.9	Day B
12	B06	0.055	0.0221698	-0.792058	31/16_NK	NHS	32	311	330	Peptid 32 - standard	0.5	8.798	1.81212	0	0.55	0.45	0.8	0.7	0.7	Day B
12	B07	0.111	0.110277	-0.687964	384_SSC	Patient	NA	NA	NA	Positive Control	NA	6.1	-0.0908091	NA	NA	NA	NA	NA	NA	Day B
12	B08	0.046	0.00800973	-0.828388	384_SSC	Patient	11	101	120	Peptid 11 - standard	1.625	3.75	-1.08923	0.5	0.5	0	0.45	1	1	Day B
12	B09	0.137	0.151184	-0.653891	384_SSC	Patient	14	131	150	Peptid 14 - standard	0.895	6.155	-0.140134	0	0.85	0.15	1	0.75	0.75	Day B
12	B10	0.485	0.698706	-0.263908	384_SSC	Patient	20	191	210	Peptid 20 - standard	-1.13	6.782	-0.637957	1	0	0	0	0.7	0.7	Day B
12	B11	0.06	0.0300365	-0.778041	384_SSC	Patient	26	251	270	Peptid 26 - standard	1.85	10.526	1.86143	0	0.75	0.25	0.9	0.9	0.9	Day B
12	B12	0.056	0.0237431	-0.78905	384_SSC	Patient	32	311	330	Peptid 32 - standard	0.5	8.798	1.81212	0	0.55	0.45	0.8	0.7	0.7	Day B
12	C01	0.059	0.0284631	-0.780661	31/16_NK	NHS	1	1	20	Peptid 1 - standard	0.715	3.737	-3.91814	1	0	0	0	0.85	0.85	Day B
12	C02	0.051	0.0158764	-0.805558	31/16_NK	NHS	12	111	130	Peptid 12 - alternative	1.155	6.161	-0.138536	0.75	0.25	0	0	1	1	Day B
12	C03	0.054	0.0205964	-0.795193	31/16_NK	NHS	15	141	160	Peptid 15 - alternative	0.75	7.353	0.0262035	0	0.35	0.65	0.65	0.95	0.95	Day B
12	C04	0.106	0.10241	-0.695008	31/16_NK	NHS	21	201	220	Peptid 21 - standard	-0.2	9.501	2.02619	0.6	0.4	0	0.25	1	1	Day B
12	C05	0.075	0.0536366	-0.745257	31/16_NK	NHS	27	261	280	Peptid 27 - standard	1.92	5.29	-0.972198	0.15	0.85	0	0.85	1	1	Day B
12	C06	0.053	0.0190231	-0.798472	31/16_NK	NHS	33	321	340	Peptid 33 - standard	0.25	11.38	2.86142	0	0.05	0.95	0.3	0.65	0.65	Day B
12	C07	0.075	0.0536366	-0.745257	384_SSC	Patient	1	1	20	Peptid 1 - standard	0.715	3.737	-3.91814	1	0	0	0	0.85	0.85	Day B
12	C08	0.065	0.0379032	-0.765957	384_SSC	Patient	12	111	130	Peptid 12 - alternative	1.155	6.161	-0.138536	0.75	0.25	0	0	1	1	Day B
12	C09	0.054	0.0205964	-0.795193	384_SSC	Patient	15	141	160	Peptid 15 - alternative	0.75	7.353	0.0262035	0	0.35	0.65	0.65	0.95	0.95	Day B
12	C10	0.144	0.162197	-0.645257	384_SSC	Patient	21	201	220	Peptid 21 - standard	-0.2	9.501	2.02619	0.6	0.4	0	0.25	1	1	Day B
12	C11	0.062	0.0331832	-0.773022	384_SSC	Patient	27	261	280	Peptid 27 - standard	1.92	5.29	-0.972198	0.15	0.85	0	0.85	1	1	Day B
12	C12	0.064	0.0363298	-0.768257	384_SSC	Patient	33	321	340	Peptid 33 - standard	0.25	11.38	2.86142	0	0.05	0.95	0.3	0.65	0.65	Day B
12	D01	0.068	0.0426232	-0.759347	31/16_NK	NHS	2	11	30	Peptid 2 - standard	-0.13	3.295	-4.08764	1	0	0	0	0.65	0.65	Day B
12	D02	0.049	0.0127297	-0.813565	31/16_NK	NHS	8	71	90	Peptid 8 - standard	0.305	10.398	0.910742	0	0.55	0.45	0.6	0.9	0.9	Day B
12	D03	0.048	0.0111564	-0.818041	31/16_NK	NHS	16	151	170	Peptid 16 - alternative	-0.105	12.204	3.0739	0	0.05	0.95	0.35	0.75	0.75	Day B
12	D04	0.104	0.0992634	-0.697883	31/16_NK	NHS	17	161	180	Peptid 17 - alternative	0.62	10.518	2.81369	0	0.55	0.45	0.7	0.8	0.8	Day B
12	D05	0.192	0.237717	-0.589604	31/16_NK	NHS	28	271	290	Peptid 28 - standard	1.21	5.406	-0.970632	0.65	0.35	0	0.35	0.95	0.95	Day B
12	D06	0.053	0.0190231	-0.798472	31/16_NK	NHS	34	331	350	Peptid 34 - standard	-0.485	12.199	2.86142	0	0	1	0	0.45	0.45	Day B
12	D07	0.079	0.0599299	-0.737848	384_SSC	Patient	2	11	30	Peptid 2 - standard	-0.13	3.295	-4.08764	1	0	0	0	0.65	0.65	Day B
12	D08	0.045	0.00643639	-0.834596	384_SSC	Patient	8	71	90	Peptid 8 - standard	0.305	10.398	0.910742	0	0.55	0.45	0.6	0.9	0.9	Day B
12	D09	0.05	0.0143031	-0.809425	384_SSC	Patient	16	151	170	Peptid 16 - alternative	-0.105	12.204	3.0739	0	0.05	0.95	0.35	0.75	0.75	Day B
12	D10	0.089	0.0756633	-0.720784	384_SSC	Patient	17	161	180	Peptid 17 - alternative	0.62	10.518	2.81369	0	0.55	0.45	0.7	0.8	0.8	Day B
12	D11	0.12	0.124437	-0.675741	384_SSC	Patient	28	271	290	Peptid 28 - standard	1.21	5.406	-0.970632	0.65	0.35	0	0.35	0.95	0.95	Day B
12	D12	0.054	0.0205964	-0.795193	384_SSC	Patient	34	331	350	Peptid 34 - standard	-0.485	12.199	2.86142	0	0	1	0	0.45	0.45	Day B
12	E01	0.318	0.435958	-0.453614	31/16_NK	NHS	3	21	40	Peptid 3 - standard	-1.26	3.226	-5.18152	1	0	0	0	0.45	0.45	Day B
12	E02	0.047	0.00958306	-0.822939	31/16_NK	NHS	9	81	100	Peptid 9 - standard	0.2	7.552	0.0786615	0	0.55	0.45	0.65	0.9	0.9	Day B
12	E03	0.052	0.0174498	-0.801919	31/16_NK	NHS	15	141	160	Peptid 15 - standard	0.75	7.353	0.0262035	0	0.35	0.65	0.65	0.95	0.95	Day B
12	E04	0.128	0.137024	-0.665283	31/16_NK	NHS	23	221	240	Peptid 23 - alternative	1.925	7.352	0.0246369	0	0.65	0.35	0.95	1	1	Day B
12	E05	0.047	0.00958306	-0.822939	31/16_NK	NHS	24	231	250	Peptid 24 - alternative	0.505	10.134	3.02459	0	0.15	0.85	0.45	0.8	0.8	Day B
12	E06	0.049	0.0127297	-0.813565	31/16_NK	NHS	35	341	360	Peptid 35 - standard	-2.005	12.023	1.91229	0	0	1	0	0	0	Day B
12	E07	0.142	0.15905	-0.647706	384_SSC	Patient	3	21	40	Peptid 3 - standard	-1.26	3.226	-5.18152	1	0	0	0	0.45	0.45	Day B
12	E08	0.05	0.0143031	-0.809425	384_SSC	Patient	9	81	100	Peptid 9 - standard	0.2	7.552	0.0786615	0	0.55	0.45	0.65	0.9	0.9	Day B
12	E09	0.078	0.0583566	-0.739664	384_SSC	Patient	15	141	160	Peptid 15 - standard	0.75	7.353	0.0262035	0	0.35	0.65	0.65	0.95	0.95	Day B
12	E10	0.163	0.19209	-0.622611	384_SSC	Patient	23	221	240	Peptid 23 - alternative	1.925	7.352	0.0246369	0	0.65	0.35	0.95	1	1	Day B
12	E11	0.058	0.0268898	-0.783363	384_SSC	Patient	24	231	250	Peptid 24 - alternative	0.505	10.134	3.02459	0	0.15	0.85	0.45	0.8	0.8	Day B
12	E12	0.07	0.0457699	-0.75515	384_SSC	Patient	35	341	360	Peptid 35 - standard	-2.005	12.023	1.91229	0	0	1	0	0	0	Day B
12	F01	0.615	0.90324	-0.0923674	31/16_NK	NHS	4	31	50	Peptid 4 - standard	-0.955	3.295	-4.22766	1	0	0	0	0.7	0.7	Day B
12	F02	0.054	0.0205964	-0.795193	31/16_NK	NHS	10	91	110	Peptid 10 - standard	1.82	5.292	-0.922889	0	1	0	0.95	1	1	Day B
12	F03	0.084	0.0677966	-0.729089	31/16_NK	NHS	16	151	170	Peptid 16 - standard	-0.105	12.204	3.0739	0	0.05	0.95	0.35	0.75	0.75	Day B
12	F04	0.05	0.0143031	-0.809425	31/16_NK	NHS	22	211	230	Peptid 22 - standard	1.5	12.5	1.90916	0.1	0.9	0	0.75	1	1	Day B
12	F05	0.055	0.0221698	-0.792058	31/16_NK	NHS	26	251	270	Peptid 26 - alternative	1.85	10.526	1.86143	0	0.75	0.25	0.9	0.9	0.9	Day B
12	F06	0.046	0.00800973	-0.828388	31/16_NK	NHS	NK	NA	NA	Negative Control	NA	6.1	-0.0908091	NA	NA	NA	NA	NA	NA	Day B
12	F07	0.54	0.785239	-0.194696	384_SSC	Patient	4	31	50	Peptid 4 - standard	-0.955	3.295	-4.22766	1	0	0	0	0.7	0.7	Day B
12	F08	0.052	0.0174498	-0.801919	384_SSC	Patient	10	91	110	Peptid 10 - standard	1.82	5.292	-0.922889	0	1	0	0.95	1	1	Day B
12	F09	0.07	0.0457699	-0.75515	384_SSC	Patient	16	151	170	Peptid 16 - standard	-0.105	12.204	3.0739	0	0.05	0.95	0.35	0.75	0.75	Day B
12	F10	0.049	0.0127297	-0.813565	384_SSC	Patient	22	211	230	Peptid 22 - standard	1.5	12.5	1.90916	0.1	0.9	0	0.75	1	1	Day B
12	F11	0.048	0.0111564	-0.818041	384_SSC	Patient	26	251	270	Peptid 26 - alternative	1.85	10.526	1.86143	0	0.75	0.25	0.9	0.9	0.9	Day B
12	F12	0.069	0.0441965	-0.757229	384_SSC	Patient	NK	NA	NA	Negative Control	NA	6.1	-0.0908091	NA	NA	NA	NA	NA	NA	Day B
12	G01	0.249	0.327398	-0.52754	31/16_NK	NHS	5	41	60	Peptid 5 - standard	-0.055	4.109	-1.13697	0.65	0.35	0	0.3	0.85	0.85	Day B
12	G02	0.105	0.100837	-0.696441	31/16_NK	NHS	11	101	120	Peptid 11 - standard	1.625	3.75	-1.08923	0.5	0.5	0	0.45	1	1	Day B
12	G03	0.194	0.240864	-0.587378	31/16_NK	NHS	17	161	180	Peptid 17 - standard	0.62	10.518	2.81369	0	0.55	0.45	0.7	0.8	0.8	Day B
12	G04	0.057	0.0253165	-0.786156	31/16_NK	NHS	23	221	240	Peptid 23 - standard	1.925	7.352	0.0246369	0	0.65	0.35	0.95	1	1	Day B
12	G05	0.059	0.0284631	-0.780661	31/16_NK	NHS	29	281	300	Peptid 29 - standard	-0.36	8.545	0.864581	0.9	0.1	0	0.05	0.75	0.75	Day B
12	G06	0.184	0.225131	-0.598567	31/16_NK	NHS	31	301	320	Peptid 31 - alternative	0.845	7.249	-0.0230898	0	1	0	1	0.95	0.95	Day B
12	G07	0.171	0.204677	-0.61335	384_SSC	Patient	5	41	60	Peptid 5 - standard	-0.055	4.109	-1.13697	0.65	0.35	0	0.3	0.85	0.85	Day B
12	G08	0.111	0.110277	-0.687964	384_SSC	Patient	11	101	120	Peptid 11 - standard	1.625	3.75	-1.08923	0.5	0.5	0	0.45	1	1	Day B
12	G09	0.197	0.245584	-0.584047	384_SSC	Patient	17	161	180	Peptid 17 - standard	0.62	10.518	2.81369	0	0.55	0.45	0.7	0.8	0.8	Day B
12	G10	0.082	0.0646499	-0.732532	384_SSC	Patient	23	221	240	Peptid 23 - standard	1.925	7.352	0.0246369	0	0.65	0.35	0.95	1	1	Day B
12	G11	0.056	0.0237431	-0.78905	384_SSC	Patient	29	281	300	Peptid 29 - standard	-0.36	8.545	0.864581	0.9	0.1	0	0.05	0.75	0.75	Day B
12	G12	0.192	0.237717	-0.589604	384_SSC	Patient	31	301	320	Peptid 31 - alternative	0.845	7.249	-0.0230898	0	1	0	1	0.95	0.95	Day B
12	H01	0.165	0.195237	-0.620283	31/16_NK	NHS	6	51	70	Peptid 6 - standard	1.495	6.332	-0.090825	0.15	0.85	0	0.8	0.9	0.9	Day B
12	H02	0.108	0.105557	-0.692166	31/16_NK	NHS	12	111	130	Peptid 12 - standard	1.155	6.161	-0.138536	0.75	0.25	0	0	1	1	Day B
12	H03	0.055	0.0221698	-0.792058	31/16_NK	NHS	18	171	190	Peptid 18 - standard	2.07	3.75	-1.18468	0.05	0.95	0	0.9	1	1	Day B
12	H04	0.055	0.0221698	-0.792058	31/16_NK	NHS	24	231	250	Peptid 24 - standard	0.505	10.134	3.02459	0	0.15	0.85	0.45	0.8	0.8	Day B
12	H05	0.054	0.0205964	-0.795193	31/16_NK	NHS	30	291	310	Peptid 30 - standard	-0.43	9.299	1.0755	0.4	0.6	0	0.55	0.75	0.75	Day B
12	H06	0.049	0.0127297	-0.813565	31/16_NK	NHS	36	351	370	Peptid 36 - standard	-1.26667	4.426	-1.08768	0	0	1	0	0	0	Day B
12	H07	0.193	0.239291	-0.58849	384_SSC	Patient	6	51	70	Peptid 6 - standard	1.495	6.332	-0.090825	0.15	0.85	0	0.8	0.9	0.9	Day B
12	H08	0.1	0.09297	-0.703746	384_SSC	Patient	12	111	130	Peptid 12 - standard	1.155	6.161	-0.138536	0.75	0.25	0	0	1	1	Day B
12	H09	0.059	0.0284631	-0.780661	384_SSC	Patient	18	171	190	Peptid 18 - standard	2.07	3.75	-1.18468	0.05	0.95	0	0.9	1	1	Day B
12	H10	0.06	0.0300365	-0.778041	384_SSC	Patient	24	231	250	Peptid 24 - standard	0.505	10.134	3.02459	0	0.15	0.85	0.45	0.8	0.8	Day B
12	H11	0.052	0.0174498	-0.801919	384_SSC	Patient	30	291	310	Peptid 30 - standard	-0.43	9.299	1.0755	0.4	0.6	0	0.55	0.75	0.75	Day B
12	H12	0.055	0.0221698	-0.792058	384_SSC	Patient	36	351	370	Peptid 36 - standard	-1.26667	4.426	-1.08768	0	0	1	0	0	0	Day B
13	A01	0.05	0.0231798	-0.790113	313_SSC	Patient	7	61	80	Peptid 7 - alternative	2.035	6.1	-0.0908091	0	1	0	0.95	0.95	0.95	Day A
13	A02	0.042	0.0129807	-0.812884	313_SSC	Patient	7	61	80	Peptid 7 - standard	2.035	6.1	-0.0908091	0	1	0	0.95	0.95	0.95	Day A
13	A03	0.053	0.0270045	-0.783163	313_SSC	Patient	13	121	140	Peptid 13 - standard	1.06	8.523	0.858299	0.25	0.75	0	0.5	0.75	0.75	Day A
13	A04	0.076	0.0563269	-0.742041	313_SSC	Patient	19	181	200	Peptid 19 - standard	0.31	5.361	-1.7534	0.55	0.45	0	0.4	0.7	0.7	Day A
13	A05	0.041	0.0117058	-0.816435	313_SSC	Patient	25	241	260	Peptid 25 - standard	0.845	13.102	4.90911	0	0.25	0.75	0.4	0.7	0.7	Day A
13	A06	0.306	0.349551	-0.512458	313_SSC	Patient	31	301	320	Peptid 31 - standard	0.845	7.249	-0.0230898	0	1	0	1	0.95	0.95	Day A
13	A07	0.107	0.0958485	-0.701045	816_NK	NHS	7	61	80	Peptid 7 - alternative	2.035	6.1	-0.0908091	0	1	0	0.95	0.95	0.95	Day A
13	A08	0.06	0.0359287	-0.768851	816_NK	NHS	7	61	80	Peptid 7 - standard	2.035	6.1	-0.0908091	0	1	0	0.95	0.95	0.95	Day A
13	A09	0.051	0.0244547	-0.787728	816_NK	NHS	13	121	140	Peptid 13 - standard	1.06	8.523	0.858299	0.25	0.75	0	0.5	0.75	0.75	Day A
13	A10	0.048	0.02063	-0.795124	816_NK	NHS	19	181	200	Peptid 19 - standard	0.31	5.361	-1.7534	0.55	0.45	0	0.4	0.7	0.7	Day A
13	A11	0.035	0.00405647	-0.84633	816_NK	NHS	25	241	260	Peptid 25 - standard	0.845	13.102	4.90911	0	0.25	0.75	0.4	0.7	0.7	Day A
13	A12	0.056	0.0308291	-0.776751	816_NK	NHS	31	301	320	Peptid 31 - standard	0.845	7.249	-0.0230898	0	1	0	1	0.95	0.95	Day A
13	B01	0.742	0.905403	-0.0903922	313_SSC	Patient	NA	NA	NA	Positive Control	NA	6.1	-0.0908091	NA	NA	NA	NA	NA	NA	Day A
13	B02	0.146	0.145569	-0.658365	313_SSC	Patient	11	101	120	Peptid 11 - standard	1.625	3.75	-1.08923	0.5	0.5	0	0.45	1	1	Day A
13	B03	0.058	0.0333789	-0.772719	313_SSC	Patient	14	131	150	Peptid 14 - standard	0.895	6.155	-0.140134	0	0.85	0.15	1	0.75	0.75	Day A
13	B04	0.076	0.0563269	-0.742041	313_SSC	Patient	20	191	210	Peptid 20 - standard	-1.13	6.782	-0.637957	1	0	0	0	0.7	0.7	Day A
13	B05	0.073	0.0525023	-0.746637	313_SSC	Patient	26	251	270	Peptid 26 - standard	1.85	10.526	1.86143	0	0.75	0.25	0.9	0.9	0.9	Day A
13	B06	0.049	0.0219049	-0.792576	313_SSC	Patient	32	311	330	Peptid 32 - standard	0.5	8.798	1.81212	0	0.55	0.45	0.8	0.7	0.7	Day A
13	B07	0.672	0.816161	-0.168844	816_NK	NHS	NA	NA	NA	Positive Control	NA	6.1	-0.0908091	NA	NA	NA	NA	NA	NA	Day A
13	B08	0.051	0.0244547	-0.787728	816_NK	NHS	11	101	120	Peptid 11 - standard	1.625	3.75	-1.08923	0.5	0.5	0	0.45	1	1	Day A
13	B09	0.055	0.0295543	-0.778836	816_NK	NHS	14	131	150	Peptid 14 - standard	0.895	6.155	-0.140134	0	0.85	0.15	1	0.75	0.75	Day A
13	B10	0.048	0.02063	-0.795124	816_NK	NHS	20	191	210	Peptid 20 - standard	-1.13	6.782	-0.637957	1	0	0	0	0.7	0.7	Day A
13	B11	0.036	0.00533136	-0.839593	816_NK	NHS	26	251	270	Peptid 26 - standard	1.85	10.526	1.86143	0	0.75	0.25	0.9	0.9	0.9	Day A
13	B12	0.048	0.02063	-0.795124	816_NK	NHS	32	311	330	Peptid 32 - standard	0.5	8.798	1.81212	0	0.55	0.45	0.8	0.7	0.7	Day A
13	C01	0.056	0.0308291	-0.776751	313_SSC	Patient	1	1	20	Peptid 1 - standard	0.715	3.737	-3.91814	1	0	0	0	0.85	0.85	Day A
13	C02	0.05	0.0231798	-0.790113	313_SSC	Patient	12	111	130	Peptid 12 - alternative	1.155	6.161	-0.138536	0.75	0.25	0	0	1	1	Day A
13	C03	0.048	0.02063	-0.795124	313_SSC	Patient	15	141	160	Peptid 15 - alternative	0.75	7.353	0.0262035	0	0.35	0.65	0.65	0.95	0.95	Day A
13	C04	0.103	0.0907489	-0.705853	313_SSC	Patient	21	201	220	Peptid 21 - standard	-0.2	9.501	2.02619	0.6	0.4	0	0.25	1	1	Day A
13	C05	0.049	0.0219049	-0.792576	313_SSC	Patient	27	261	280	Peptid 27 - standard	1.92	5.29	-0.972198	0.15	0.85	0	0.85	1	1	Day A
13	C06	0.247	0.274333	-0.563969	313_SSC	Patient	33	321	340	Peptid 33 - standard	0.25	11.38	2.86142	0	0.05	0.95	0.3	0.65	0.65	Day A
13	C07	0.046	0.0180802	-0.800516	816_NK	NHS	1	1	20	Peptid 1 - standard	0.715	3.737	-3.91814	1	0	0	0	0.85	0.85	Day A
13	C08	0.047	0.0193551	-0.797767	816_NK	NHS	12	111	130	Peptid 12 - alternative	1.155	6.161	-0.138536	0.75	0.25	0	0	1	1	Day A
13	C09	0.056	0.0308291	-0.776751	816_NK	NHS	15	141	160	Peptid 15 - alternative	0.75	7.353	0.0262035	0	0.35	0.65	0.65	0.95	0.95	Day A
13	C10	0.13	0.125171	-0.675122	816_NK	NHS	21	201	220	Peptid 21 - standard	-0.2	9.501	2.02619	0.6	0.4	0	0.25	1	1	Day A
13	C11	0.035	0.00405647	-0.84633	816_NK	NHS	27	261	280	Peptid 27 - standard	1.92	5.29	-0.972198	0.15	0.85	0	0.85	1	1	Day A
13	C12	0.233	0.256485	-0.576394	816_NK	NHS	33	321	340	Peptid 33 - standard	0.25	11.38	2.86142	0	0.05	0.95	0.3	0.65	0.65	Day A
13	D01	0.042	0.0129807	-0.812884	313_SSC	Patient	2	11	30	Peptid 2 - standard	-0.13	3.295	-4.08764	1	0	0	0	0.65	0.65	Day A
13	D02	0.042	0.0129807	-0.812884	313_SSC	Patient	8	71	90	Peptid 8 - standard	0.305	10.398	0.910742	0	0.55	0.45	0.6	0.9	0.9	Day A
13	D03	0.082	0.0639763	-0.73328	313_SSC	Patient	16	151	170	Peptid 16 - alternative	-0.105	12.204	3.0739	0	0.05	0.95	0.35	0.75	0.75	Day A
13	D04	0.063	0.0397534	-0.763317	313_SSC	Patient	17	161	180	Peptid 17 - alternative	0.62	10.518	2.81369	0	0.55	0.45	0.7	0.8	0.8	Day A
13	D05	0.046	0.0180802	-0.800516	313_SSC	Patient	28	271	290	Peptid 28 - standard	1.21	5.406	-0.970632	0.65	0.35	0	0.35	0.95	0.95	Day A
13	D06	0.17	0.176167	-0.634546	313_SSC	Patient	34	331	350	Peptid 34 - standard	-0.485	12.199	2.86142	0	0	1	0	0.45	0.45	Day A
13	D07	0.051	0.0244547	-0.787728	816_NK	NHS	2	11	30	Peptid 2 - standard	-0.13	3.295	-4.08764	1	0	0	0	0.65	0.65	Day A
13	D08	0.046	0.0180802	-0.800516	816_NK	NHS	8	71	90	Peptid 8 - standard	0.305	10.398	0.910742	0	0.55	0.45	0.6	0.9	0.9	Day A
13	D09	0.208	0.224612	-0.598938	816_NK	NHS	16	151	170	Peptid 16 - alternative	-0.105	12.204	3.0739	0	0.05	0.95	0.35	0.75	0.75	Day A
13	D10	0.066	0.043578	-0.758057	816_NK	NHS	17	161	180	Peptid 17 - alternative	0.62	10.518	2.81369	0	0.55	0.45	0.7	0.8	0.8	Day A
13	D11	0.037	0.00660625	-0.83388	816_NK	NHS	28	271	290	Peptid 28 - standard	1.21	5.406	-0.970632	0.65	0.35	0	0.35	0.95	0.95	Day A
13	D12	0.481	0.572657	-0.357932	816_NK	NHS	34	331	350	Peptid 34 - standard	-0.485	12.199	2.86142	0	0	1	0	0.45	0.45	Day A
13	E01	0.052	0.0257296	-0.785413	313_SSC	Patient	3	21	40	Peptid 3 - standard	-1.26	3.226	-5.18152	1	0	0	0	0.45	0.45	Day A
13	E02	0.053	0.0270045	-0.783163	313_SSC	Patient	9	81	100	Peptid 9 - standard	0.2	7.552	0.0786615	0	0.55	0.45	0.65	0.9	0.9	Day A
13	E03	0.048	0.02063	-0.795124	313_SSC	Patient	15	141	160	Peptid 15 - standard	0.75	7.353	0.0262035	0	0.35	0.65	0.65	0.95	0.95	Day A
13	E04	0.044	0.0155305	-0.806387	313_SSC	Patient	23	221	240	Peptid 23 - alternative	1.925	7.352	0.0246369	0	0.65	0.35	0.95	1	1	Day A
13	E05	0.044	0.0155305	-0.806387	313_SSC	Patient	24	231	250	Peptid 24 - alternative	0.505	10.134	3.02459	0	0.15	0.85	0.45	0.8	0.8	Day A
13	E06	0.068	0.0461278	-0.754682	313_SSC	Patient	35	341	360	Peptid 35 - standard	-2.005	12.023	1.91229	0	0	1	0	0	0	Day A
13	E07	0.05	0.0231798	-0.790113	816_NK	NHS	3	21	40	Peptid 3 - standard	-1.26	3.226	-5.18152	1	0	0	0	0.45	0.45	Day A
13	E08	0.068	0.0461278	-0.754682	816_NK	NHS	9	81	100	Peptid 9 - standard	0.2	7.552	0.0786615	0	0.55	0.45	0.65	0.9	0.9	Day A
13	E09	0.065	0.0423031	-0.759782	816_NK	NHS	15	141	160	Peptid 15 - standard	0.75	7.353	0.0262035	0	0.35	0.65	0.65	0.95	0.95	Day A
13	E10	0.045	0.0168054	-0.803384	816_NK	NHS	23	221	240	Peptid 23 - alternative	1.925	7.352	0.0246369	0	0.65	0.35	0.95	1	1	Day A
13	E11	0.036	0.00533136	-0.839593	816_NK	NHS	24	231	250	Peptid 24 - alternative	0.505	10.134	3.02459	0	0.15	0.85	0.45	0.8	0.8	Day A
13	E12	0.068	0.0461278	-0.754682	816_NK	NHS	35	341	360	Peptid 35 - standard	-2.005	12.023	1.91229	0	0	1	0	0	0	Day A
13	F01	0.048	0.02063	-0.795124	313_SSC	Patient	4	31	50	Peptid 4 - standard	-0.955	3.295	-4.22766	1	0	0	0	0.7	0.7	Day A
13	F02	0.04	0.0104309	-0.82024	313_SSC	Patient	10	91	110	Peptid 10 - standard	1.82	5.292	-0.922889	0	1	0	0.95	1	1	Day A
13	F03	0.045	0.0168054	-0.803384	313_SSC	Patient	16	151	170	Peptid 16 - standard	-0.105	12.204	3.0739	0	0.05	0.95	0.35	0.75	0.75	Day A
13	F04	0.044	0.0155305	-0.806387	313_SSC	Patient	22	211	230	Peptid 22 - standard	1.5	12.5	1.90916	0.1	0.9	0	0.75	1	1	Day A
13	F05	0.041	0.0117058	-0.816435	313_SSC	Patient	26	251	270	Peptid 26 - alternative	1.85	10.526	1.86143	0	0.75	0.25	0.9	0.9	0.9	Day A
13	F06	0.046	0.0180802	-0.800516	313_SSC	Patient	NK	NA	NA	Negative Control	NA	6.1	-0.0908091	NA	NA	NA	NA	NA	NA	Day A
13	F07	0.05	0.0231798	-0.790113	816_NK	NHS	4	31	50	Peptid 4 - standard	-0.955	3.295	-4.22766	1	0	0	0	0.7	0.7	Day A
13	F08	0.053	0.0270045	-0.783163	816_NK	NHS	10	91	110	Peptid 10 - standard	1.82	5.292	-0.922889	0	1	0	0.95	1	1	Day A
13	F09	0.05	0.0231798	-0.790113	816_NK	NHS	16	151	170	Peptid 16 - standard	-0.105	12.204	3.0739	0	0.05	0.95	0.35	0.75	0.75	Day A
13	F10	0.046	0.0180802	-0.800516	816_NK	NHS	22	211	230	Peptid 22 - standard	1.5	12.5	1.90916	0.1	0.9	0	0.75	1	1	Day A
13	F11	0.037	0.00660625	-0.83388	816_NK	NHS	26	251	270	Peptid 26 - alternative	1.85	10.526	1.86143	0	0.75	0.25	0.9	0.9	0.9	Day A
13	F12	0.073	0.0525023	-0.746637	816_NK	NHS	NK	NA	NA	Negative Control	NA	6.1	-0.0908091	NA	NA	NA	NA	NA	NA	Day A
13	G01	0.047	0.0193551	-0.797767	313_SSC	Patient	5	41	60	Peptid 5 - standard	-0.055	4.109	-1.13697	0.65	0.35	0	0.3	0.85	0.85	Day A
13	G02	0.048	0.02063	-0.795124	313_SSC	Patient	11	101	120	Peptid 11 - standard	1.625	3.75	-1.08923	0.5	0.5	0	0.45	1	1	Day A
13	G03	0.158	0.160868	-0.64629	313_SSC	Patient	17	161	180	Peptid 17 - standard	0.62	10.518	2.81369	0	0.55	0.45	0.7	0.8	0.8	Day A
13	G04	0.05	0.0231798	-0.790113	313_SSC	Patient	23	221	240	Peptid 23 - standard	1.925	7.352	0.0246369	0	0.65	0.35	0.95	1	1	Day A
13	G05	0.05	0.0231798	-0.790113	313_SSC	Patient	29	281	300	Peptid 29 - standard	-0.36	8.545	0.864581	0.9	0.1	0	0.05	0.75	0.75	Day A
13	G06	0.314	0.359751	-0.505524	313_SSC	Patient	31	301	320	Peptid 31 - alternative	0.845	7.249	-0.0230898	0	1	0	1	0.95	0.95	Day A
13	G07	0.05	0.0231798	-0.790113	816_NK	NHS	5	41	60	Peptid 5 - standard	-0.055	4.109	-1.13697	0.65	0.35	0	0.3	0.85	0.85	Day A
13	G08	0.049	0.0219049	-0.792576	816_NK	NHS	11	101	120	Peptid 11 - standard	1.625	3.75	-1.08923	0.5	0.5	0	0.45	1	1	Day A
13	G09	0.191	0.202939	-0.614621	816_NK	NHS	17	161	180	Peptid 17 - standard	0.62	10.518	2.81369	0	0.55	0.45	0.7	0.8	0.8	Day A
13	G10	0.054	0.0282794	-0.780972	816_NK	NHS	23	221	240	Peptid 23 - standard	1.925	7.352	0.0246369	0	0.65	0.35	0.95	1	1	Day A
13	G11	0.038	0.00788113	-0.828863	816_NK	NHS	29	281	300	Peptid 29 - standard	-0.36	8.545	0.864581	0.9	0.1	0	0.05	0.75	0.75	Day A
13	G12	0.096	0.0818247	-0.714545	816_NK	NHS	31	301	320	Peptid 31 - alternative	0.845	7.249	-0.0230898	0	1	0	1	0.95	0.95	Day A
13	H01	0.043	0.0142556	-0.809546	313_SSC	Patient	6	51	70	Peptid 6 - standard	1.495	6.332	-0.090825	0.15	0.85	0	0.8	0.9	0.9	Day A
13	H02	0.048	0.02063	-0.795124	313_SSC	Patient	12	111	130	Peptid 12 - standard	1.155	6.161	-0.138536	0.75	0.25	0	0	1	1	Day A
13	H03	0.071	0.0499525	-0.749793	313_SSC	Patient	18	171	190	Peptid 18 - standard	2.07	3.75	-1.18468	0.05	0.95	0	0.9	1	1	Day A
13	H04	0.154	0.155768	-0.650275	313_SSC	Patient	24	231	250	Peptid 24 - standard	0.505	10.134	3.02459	0	0.15	0.85	0.45	0.8	0.8	Day A
13	H05	0.065	0.0423031	-0.759782	313_SSC	Patient	30	291	310	Peptid 30 - standard	-0.43	9.299	1.0755	0.4	0.6	0	0.55	0.75	0.75	Day A
13	H06	0.089	0.0729005	-0.723655	313_SSC	Patient	36	351	370	Peptid 36 - standard	-1.26667	4.426	-1.08768	0	0	1	0	0	0	Day A
13	H07	0.047	0.0193551	-0.797767	816_NK	NHS	6	51	70	Peptid 6 - standard	1.495	6.332	-0.090825	0.15	0.85	0	0.8	0.9	0.9	Day A
13	H08	0.054	0.0282794	-0.780972	816_NK	NHS	12	111	130	Peptid 12 - standard	1.155	6.161	-0.138536	0.75	0.25	0	0	1	1	Day A
13	H09	0.082	0.0639763	-0.73328	816_NK	NHS	18	171	190	Peptid 18 - standard	2.07	3.75	-1.18468	0.05	0.95	0	0.9	1	1	Day A
13	H10	0.172	0.178716	-0.632617	816_NK	NHS	24	231	250	Peptid 24 - standard	0.505	10.134	3.02459	0	0.15	0.85	0.45	0.8	0.8	Day A
13	H11	0.04	0.0104309	-0.82024	816_NK	NHS	30	291	310	Peptid 30 - standard	-0.43	9.299	1.0755	0.4	0.6	0	0.55	0.75	0.75	Day A
13	H12	0.057	0.032104	-0.774713	816_NK	NHS	36	351	370	Peptid 36 - standard	-1.26667	4.426	-1.08768	0	0	1	0	0	0	Day A
14	A01	0.077	0.0518073	-0.747489	4216_NK	NHS	7	61	80	Peptid 7 - alternative	2.035	6.1	-0.0908091	0	1	0	0.95	0.95	0.95	Day A
14	A02	0.088	0.0661522	-0.730879	4216_NK	NHS	7	61	80	Peptid 7 - standard	2.035	6.1	-0.0908091	0	1	0	0.95	0.95	0.95	Day A
14	A03	0.063	0.0335503	-0.772454	4216_NK	NHS	13	121	140	Peptid 13 - standard	1.06	8.523	0.858299	0.25	0.75	0	0.5	0.75	0.75	Day A
14	A04	0.051	0.0179014	-0.800911	4216_NK	NHS	19	181	200	Peptid 19 - standard	0.31	5.361	-1.7534	0.55	0.45	0	0.4	0.7	0.7	Day A
14	A05	0.572	0.697324	-0.264979	4216_NK	NHS	25	241	260	Peptid 25 - standard	0.845	13.102	4.90911	0	0.25	0.75	0.4	0.7	0.7	Day A
14	A06	0.07	0.0426788	-0.759271	4216_NK	NHS	31	301	320	Peptid 31 - standard	0.845	7.249	-0.0230898	0	1	0	1	0.95	0.95	Day A
14	A07	0.041	0.00486064	-0.841937	327_SSC	Patient	7	61	80	Peptid 7 - alternative	2.035	6.1	-0.0908091	0	1	0	0.95	0.95	0.95	Day A
14	A08	0.107	0.0909296	-0.705681	327_SSC	Patient	7	61	80	Peptid 7 - standard	2.035	6.1	-0.0908091	0	1	0	0.95	0.95	0.95	Day A
14	A09	0.041	0.00486064	-0.841937	327_SSC	Patient	13	121	140	Peptid 13 - standard	1.06	8.523	0.858299	0.25	0.75	0	0.5	0.75	0.75	Day A
14	A10	0.043	0.00746879	-0.830423	327_SSC	Patient	19	181	200	Peptid 19 - standard	0.31	5.361	-1.7534	0.55	0.45	0	0.4	0.7	0.7	Day A
14	A11	0.446	0.533011	-0.386207	327_SSC	Patient	25	241	260	Peptid 25 - standard	0.845	13.102	4.90911	0	0.25	0.75	0.4	0.7	0.7	Day A
14	A12	0.066	0.0374625	-0.766596	327_SSC	Patient	31	301	320	Peptid 31 - standard	0.845	7.249	-0.0230898	0	1	0	1	0.95	0.95	Day A
14	B01	0.598	0.73123	-0.238401	4216_NK	NHS	NA	NA	NA	Positive Control	NA	6.1	-0.0908091	NA	NA	NA	NA	NA	NA	Day A
14	B02	0.045	0.0100769	-0.821349	4216_NK	NHS	11	101	120	Peptid 11 - standard	1.625	3.75	-1.08923	0.5	0.5	0	0.45	1	1	Day A
14	B03	0.059	0.028334	-0.780879	4216_NK	NHS	14	131	150	Peptid 14 - standard	0.895	6.155	-0.140134	0	0.85	0.15	1	0.75	0.75	Day A
14	B04	0.052	0.0192055	-0.798084	4216_NK	NHS	20	191	210	Peptid 20 - standard	-1.13	6.782	-0.637957	1	0	0	0	0.7	0.7	Day A
14	B05	0.081	0.0570236	-0.74122	4216_NK	NHS	26	251	270	Peptid 26 - standard	1.85	10.526	1.86143	0	0.75	0.25	0.9	0.9	0.9	Day A
14	B06	0.185	0.192647	-0.622199	4216_NK	NHS	32	311	330	Peptid 32 - standard	0.5	8.798	1.81212	0	0.55	0.45	0.8	0.7	0.7	Day A
14	B07	0.399	0.471719	-0.429019	327_SSC	Patient	NA	NA	NA	Positive Control	NA	6.1	-0.0908091	NA	NA	NA	NA	NA	NA	Day A
14	B08	0.043	0.00746879	-0.830423	327_SSC	Patient	11	101	120	Peptid 11 - standard	1.625	3.75	-1.08923	0.5	0.5	0	0.45	1	1	Day A
14	B09	0.043	0.00746879	-0.830423	327_SSC	Patient	14	131	150	Peptid 14 - standard	0.895	6.155	-0.140134	0	0.85	0.15	1	0.75	0.75	Day A
14	B10	0.043	0.00746879	-0.830423	327_SSC	Patient	20	191	210	Peptid 20 - standard	-1.13	6.782	-0.637957	1	0	0	0	0.7	0.7	Day A
14	B11	0.061	0.0309421	-0.776568	327_SSC	Patient	26	251	270	Peptid 26 - standard	1.85	10.526	1.86143	0	0.75	0.25	0.9	0.9	0.9	Day A
14	B12	0.21	0.225249	-0.598482	327_SSC	Patient	32	311	330	Peptid 32 - standard	0.5	8.798	1.81212	0	0.55	0.45	0.8	0.7	0.7	Day A
14	C01	0.06	0.0296381	-0.778697	4216_NK	NHS	1	1	20	Peptid 1 - standard	0.715	3.737	-3.91814	1	0	0	0	0.85	0.85	Day A
14	C02	0.075	0.0491992	-0.75074	4216_NK	NHS	12	111	130	Peptid 12 - alternative	1.155	6.161	-0.138536	0.75	0.25	0	0	1	1	Day A
14	C03	0.053	0.0205095	-0.79537	4216_NK	NHS	15	141	160	Peptid 15 - alternative	0.75	7.353	0.0262035	0	0.35	0.65	0.65	0.95	0.95	Day A
14	C04	0.194	0.204384	-0.613565	4216_NK	NHS	21	201	220	Peptid 21 - standard	-0.2	9.501	2.02619	0.6	0.4	0	0.25	1	1	Day A
14	C05	0.094	0.0739766	-0.722531	4216_NK	NHS	27	261	280	Peptid 27 - standard	1.92	5.29	-0.972198	0.15	0.85	0	0.85	1	1	Day A
14	C06	0.399	0.471719	-0.429019	4216_NK	NHS	33	321	340	Peptid 33 - standard	0.25	11.38	2.86142	0	0.05	0.95	0.3	0.65	0.65	Day A
14	C07	0.046	0.011381	-0.817379	327_SSC	Patient	1	1	20	Peptid 1 - standard	0.715	3.737	-3.91814	1	0	0	0	0.85	0.85	Day A
14	C08	0.053	0.0205095	-0.79537	327_SSC	Patient	12	111	130	Peptid 12 - alternative	1.155	6.161	-0.138536	0.75	0.25	0	0	1	1	Day A
14	C09	0.05	0.0165973	-0.803864	327_SSC	Patient	15	141	160	Peptid 15 - alternative	0.75	7.353	0.0262035	0	0.35	0.65	0.65	0.95	0.95	Day A
14	C10	0.047	0.0126851	-0.813688	327_SSC	Patient	21	201	220	Peptid 21 - standard	-0.2	9.501	2.02619	0.6	0.4	0	0.25	1	1	Day A
14	C11	0.059	0.028334	-0.780879	327_SSC	Patient	27	261	280	Peptid 27 - standard	1.92	5.29	-0.972198	0.15	0.85	0	0.85	1	1	Day A
14	C12	0.104	0.0870173	-0.709442	327_SSC	Patient	33	321	340	Peptid 33 - standard	0.25	11.38	2.86142	0	0.05	0.95	0.3	0.65	0.65	Day A
14	D01	0.063	0.0335503	-0.772454	4216_NK	NHS	2	11	30	Peptid 2 - standard	-0.13	3.295	-4.08764	1	0	0	0	0.65	0.65	Day A
14	D02	0.069	0.0413747	-0.761056	4216_NK	NHS	8	71	90	Peptid 8 - standard	0.305	10.398	0.910742	0	0.55	0.45	0.6	0.9	0.9	Day A
14	D03	0.141	0.135268	-0.666722	4216_NK	NHS	16	151	170	Peptid 16 - alternative	-0.105	12.204	3.0739	0	0.05	0.95	0.35	0.75	0.75	Day A
14	D04	0.064	0.0348544	-0.770462	4216_NK	NHS	17	161	180	Peptid 17 - alternative	0.62	10.518	2.81369	0	0.55	0.45	0.7	0.8	0.8	Day A
14	D05	0.062	0.0322462	-0.774488	4216_NK	NHS	28	271	290	Peptid 28 - standard	1.21	5.406	-0.970632	0.65	0.35	0	0.35	0.95	0.95	Day A
14	D06	0.731	0.904672	-0.09106	4216_NK	NHS	34	331	350	Peptid 34 - standard	-0.485	12.199	2.86142	0	0	1	0	0.45	0.45	Day A
14	D07	0.046	0.011381	-0.817379	327_SSC	Patient	2	11	30	Peptid 2 - standard	-0.13	3.295	-4.08764	1	0	0	0	0.65	0.65	Day A
14	D08	0.051	0.0179014	-0.800911	327_SSC	Patient	8	71	90	Peptid 8 - standard	0.305	10.398	0.910742	0	0.55	0.45	0.6	0.9	0.9	Day A
14	D09	0.069	0.0413747	-0.761056	327_SSC	Patient	16	151	170	Peptid 16 - alternative	-0.105	12.204	3.0739	0	0.05	0.95	0.35	0.75	0.75	Day A
14	D10	0.045	0.0100769	-0.821349	327_SSC	Patient	17	161	180	Peptid 17 - alternative	0.62	10.518	2.81369	0	0.55	0.45	0.7	0.8	0.8	Day A
14	D11	0.043	0.00746879	-0.830423	327_SSC	Patient	28	271	290	Peptid 28 - standard	1.21	5.406	-0.970632	0.65	0.35	0	0.35	0.95	0.95	Day A
14	D12	0.57	0.694716	-0.266998	327_SSC	Patient	34	331	350	Peptid 34 - standard	-0.485	12.199	2.86142	0	0	1	0	0.45	0.45	Day A
14	E01	0.053	0.0205095	-0.79537	4216_NK	NHS	3	21	40	Peptid 3 - standard	-1.26	3.226	-5.18152	1	0	0	0	0.45	0.45	Day A
14	E02	0.093	0.0726725	-0.723894	4216_NK	NHS	9	81	100	Peptid 9 - standard	0.2	7.552	0.0786615	0	0.55	0.45	0.65	0.9	0.9	Day A
14	E03	0.079	0.0544155	-0.744318	4216_NK	NHS	15	141	160	Peptid 15 - standard	0.75	7.353	0.0262035	0	0.35	0.65	0.65	0.95	0.95	Day A
14	E04	0.064	0.0348544	-0.770462	4216_NK	NHS	23	221	240	Peptid 23 - alternative	1.925	7.352	0.0246369	0	0.65	0.35	0.95	1	1	Day A
14	E05	0.152	0.149613	-0.655137	4216_NK	NHS	24	231	250	Peptid 24 - alternative	0.505	10.134	3.02459	0	0.15	0.85	0.45	0.8	0.8	Day A
14	E06	0.098	0.0791929	-0.717184	4216_NK	NHS	35	341	360	Peptid 35 - standard	-2.005	12.023	1.91229	0	0	1	0	0	0	Day A
14	E07	0.057	0.0257258	-0.78542	327_SSC	Patient	3	21	40	Peptid 3 - standard	-1.26	3.226	-5.18152	1	0	0	0	0.45	0.45	Day A
14	E08	0.053	0.0205095	-0.79537	327_SSC	Patient	9	81	100	Peptid 9 - standard	0.2	7.552	0.0786615	0	0.55	0.45	0.65	0.9	0.9	Day A
14	E09	0.082	0.0583277	-0.739697	327_SSC	Patient	15	141	160	Peptid 15 - standard	0.75	7.353	0.0262035	0	0.35	0.65	0.65	0.95	0.95	Day A
14	E10	0.042	0.00616472	-0.835767	327_SSC	Patient	23	221	240	Peptid 23 - alternative	1.925	7.352	0.0246369	0	0.65	0.35	0.95	1	1	Day A
14	E11	0.064	0.0348544	-0.770462	327_SSC	Patient	24	231	250	Peptid 24 - alternative	0.505	10.134	3.02459	0	0.15	0.85	0.45	0.8	0.8	Day A
14	E12	0.062	0.0322462	-0.774488	327_SSC	Patient	35	341	360	Peptid 35 - standard	-2.005	12.023	1.91229	0	0	1	0	0	0	Day A
14	F01	0.063	0.0335503	-0.772454	4216_NK	NHS	4	31	50	Peptid 4 - standard	-0.955	3.295	-4.22766	1	0	0	0	0.7	0.7	Day A
14	F02	0.071	0.0439829	-0.757514	4216_NK	NHS	10	91	110	Peptid 10 - standard	1.82	5.292	-0.922889	0	1	0	0.95	1	1	Day A
14	F03	0.126	0.115707	-0.683213	4216_NK	NHS	16	151	170	Peptid 16 - standard	-0.105	12.204	3.0739	0	0.05	0.95	0.35	0.75	0.75	Day A
14	F04	0.089	0.0674562	-0.729457	4216_NK	NHS	22	211	230	Peptid 22 - standard	1.5	12.5	1.90916	0.1	0.9	0	0.75	1	1	Day A
14	F05	0.069	0.0413747	-0.761056	4216_NK	NHS	26	251	270	Peptid 26 - alternative	1.85	10.526	1.86143	0	0.75	0.25	0.9	0.9	0.9	Day A
14	F06	0.059	0.028334	-0.780879	4216_NK	NHS	NK	NA	NA	Negative Control	NA	6.1	-0.0908091	NA	NA	NA	NA	NA	NA	Day A
14	F07	0.059	0.028334	-0.780879	327_SSC	Patient	4	31	50	Peptid 4 - standard	-0.955	3.295	-4.22766	1	0	0	0	0.7	0.7	Day A
14	F08	0.043	0.00746879	-0.830423	327_SSC	Patient	10	91	110	Peptid 10 - standard	1.82	5.292	-0.922889	0	1	0	0.95	1	1	Day A
14	F09	0.055	0.0231177	-0.790231	327_SSC	Patient	16	151	170	Peptid 16 - standard	-0.105	12.204	3.0739	0	0.05	0.95	0.35	0.75	0.75	Day A
14	F10	0.044	0.00877287	-0.825665	327_SSC	Patient	22	211	230	Peptid 22 - standard	1.5	12.5	1.90916	0.1	0.9	0	0.75	1	1	Day A
14	F11	0.042	0.00616472	-0.835767	327_SSC	Patient	26	251	270	Peptid 26 - alternative	1.85	10.526	1.86143	0	0.75	0.25	0.9	0.9	0.9	Day A
14	F12	0.046	0.011381	-0.817379	327_SSC	Patient	NK	NA	NA	Negative Control	NA	6.1	-0.0908091	NA	NA	NA	NA	NA	NA	Day A
14	G01	0.055	0.0231177	-0.790231	4216_NK	NHS	5	41	60	Peptid 5 - standard	-0.055	4.109	-1.13697	0.65	0.35	0	0.3	0.85	0.85	Day A
14	G02	0.082	0.0583277	-0.739697	4216_NK	NHS	11	101	120	Peptid 11 - standard	1.625	3.75	-1.08923	0.5	0.5	0	0.45	1	1	Day A
14	G03	0.34	0.394779	-0.481712	4216_NK	NHS	17	161	180	Peptid 17 - standard	0.62	10.518	2.81369	0	0.55	0.45	0.7	0.8	0.8	Day A
14	G04	0.069	0.0413747	-0.761056	4216_NK	NHS	23	221	240	Peptid 23 - standard	1.925	7.352	0.0246369	0	0.65	0.35	0.95	1	1	Day A
14	G05	0.083	0.0596318	-0.73819	4216_NK	NHS	29	281	300	Peptid 29 - standard	-0.36	8.545	0.864581	0.9	0.1	0	0.05	0.75	0.75	Day A
14	G06	0.055	0.0231177	-0.790231	4216_NK	NHS	31	301	320	Peptid 31 - alternative	0.845	7.249	-0.0230898	0	1	0	1	0.95	0.95	Day A
14	G07	0.049	0.0152932	-0.806963	327_SSC	Patient	5	41	60	Peptid 5 - standard	-0.055	4.109	-1.13697	0.65	0.35	0	0.3	0.85	0.85	Day A
14	G08	0.045	0.0100769	-0.821349	327_SSC	Patient	11	101	120	Peptid 11 - standard	1.625	3.75	-1.08923	0.5	0.5	0	0.45	1	1	Day A
14	G09	0.221	0.239594	-0.588276	327_SSC	Patient	17	161	180	Peptid 17 - standard	0.62	10.518	2.81369	0	0.55	0.45	0.7	0.8	0.8	Day A
14	G10	0.063	0.0335503	-0.772454	327_SSC	Patient	23	221	240	Peptid 23 - standard	1.925	7.352	0.0246369	0	0.65	0.35	0.95	1	1	Day A
14	G11	0.045	0.0100769	-0.821349	327_SSC	Patient	29	281	300	Peptid 29 - standard	-0.36	8.545	0.864581	0.9	0.1	0	0.05	0.75	0.75	Day A
14	G12	0.046	0.011381	-0.817379	327_SSC	Patient	31	301	320	Peptid 31 - alternative	0.845	7.249	-0.0230898	0	1	0	1	0.95	0.95	Day A
14	H01	0.08	0.0557196	-0.74276	4216_NK	NHS	6	51	70	Peptid 6 - standard	1.495	6.332	-0.090825	0.15	0.85	0	0.8	0.9	0.9	Day A
14	H02	0.074	0.0478951	-0.752398	4216_NK	NHS	12	111	130	Peptid 12 - standard	1.155	6.161	-0.138536	0.75	0.25	0	0	1	1	Day A
14	H03	0.059	0.028334	-0.780879	4216_NK	NHS	18	171	190	Peptid 18 - standard	2.07	3.75	-1.18468	0.05	0.95	0	0.9	1	1	Day A
14	H04	0.394	0.465199	-0.433521	4216_NK	NHS	24	231	250	Peptid 24 - standard	0.505	10.134	3.02459	0	0.15	0.85	0.45	0.8	0.8	Day A
14	H05	0.065	0.0361584	-0.76851	4216_NK	NHS	30	291	310	Peptid 30 - standard	-0.43	9.299	1.0755	0.4	0.6	0	0.55	0.75	0.75	Day A
14	H06	0.066	0.0374625	-0.766596	4216_NK	NHS	36	351	370	Peptid 36 - standard	-1.26667	4.426	-1.08768	0	0	1	0	0	0	Day A
14	H07	0.045	0.0100769	-0.821349	327_SSC	Patient	6	51	70	Peptid 6 - standard	1.495	6.332	-0.090825	0.15	0.85	0	0.8	0.9	0.9	Day A
14	H08	0.051	0.0179014	-0.800911	327_SSC	Patient	12	111	130	Peptid 12 - standard	1.155	6.161	-0.138536	0.75	0.25	0	0	1	1	Day A
14	H09	0.041	0.00486064	-0.841937	327_SSC	Patient	18	171	190	Peptid 18 - standard	2.07	3.75	-1.18468	0.05	0.95	0	0.9	1	1	Day A
14	H10	0.267	0.299582	-0.546561	327_SSC	Patient	24	231	250	Peptid 24 - standard	0.505	10.134	3.02459	0	0.15	0.85	0.45	0.8	0.8	Day A
14	H11	0.046	0.011381	-0.817379	327_SSC	Patient	30	291	310	Peptid 30 - standard	-0.43	9.299	1.0755	0.4	0.6	0	0.55	0.75	0.75	Day A
14	H12	0.044	0.00877287	-0.825665	327_SSC	Patient	36	351	370	Peptid 36 - standard	-1.26667	4.426	-1.08768	0	0	1	0	0	0	Day A
15	A01	0.051	0.00986675	-0.822019	62/16_NK	NHS	7	61	80	Peptid 7 - alternative	2.035	6.1	-0.0908091	0	1	0	0.95	0.95	0.95	Day B
15	A02	0.058	0.0173889	-0.802056	62/16_NK	NHS	7	61	80	Peptid 7 - standard	2.035	6.1	-0.0908091	0	1	0	0.95	0.95	0.95	Day B
15	A03	0.401	0.385976	-0.4877	62/16_NK	NHS	13	121	140	Peptid 13 - standard	1.06	8.523	0.858299	0.25	0.75	0	0.5	0.75	0.75	Day B
15	A04	0.055	0.0141651	-0.809776	62/16_NK	NHS	19	181	200	Peptid 19 - standard	0.31	5.361	-1.7534	0.55	0.45	0	0.4	0.7	0.7	Day B
15	A05	0.072	0.0324333	-0.774193	62/16_NK	NHS	25	241	260	Peptid 25 - standard	0.845	13.102	4.90911	0	0.25	0.75	0.4	0.7	0.7	Day B
15	A06	0.05	0.00879215	-0.825598	62/16_NK	NHS	31	301	320	Peptid 31 - standard	0.845	7.249	-0.0230898	0	1	0	1	0.95	0.95	Day B
15	A07	0.052	0.0109413	-0.818683	327_SSC	Patient	7	61	80	Peptid 7 - alternative	2.035	6.1	-0.0908091	0	1	0	0.95	0.95	0.95	Day B
15	A08	0.062	0.0216873	-0.793005	327_SSC	Patient	7	61	80	Peptid 7 - standard	2.035	6.1	-0.0908091	0	1	0	0.95	0.95	0.95	Day B
15	A09	0.333	0.312903	-0.537436	327_SSC	Patient	13	121	140	Peptid 13 - standard	1.06	8.523	0.858299	0.25	0.75	0	0.5	0.75	0.75	Day B
15	A10	0.046	0.00449377	-0.843874	327_SSC	Patient	19	181	200	Peptid 19 - standard	0.31	5.361	-1.7534	0.55	0.45	0	0.4	0.7	0.7	Day B
15	A11	0.068	0.0281349	-0.781217	327_SSC	Patient	25	241	260	Peptid 25 - standard	0.845	13.102	4.90911	0	0.25	0.75	0.4	0.7	0.7	Day B
15	A12	0.057	0.0163143	-0.804524	327_SSC	Patient	31	301	320	Peptid 31 - standard	0.845	7.249	-0.0230898	0	1	0	1	0.95	0.95	Day B
15	B01	0.076	0.0367317	-0.767664	62/16_NK	NHS	NA	NA	NA	Positive Control	NA	6.1	-0.0908091	NA	NA	NA	NA	NA	NA	Day B
15	B02	0.052	0.0109413	-0.818683	62/16_NK	NHS	11	101	120	Peptid 11 - standard	1.625	3.75	-1.08923	0.5	0.5	0	0.45	1	1	Day B
15	B03	0.211	0.181802	-0.630292	62/16_NK	NHS	14	131	150	Peptid 14 - standard	0.895	6.155	-0.140134	0	0.85	0.15	1	0.75	0.75	Day B
15	B04	0.596	0.595522	-0.341376	62/16_NK	NHS	20	191	210	Peptid 20 - standard	-1.13	6.782	-0.637957	1	0	0	0	0.7	0.7	Day B
15	B05	0.064	0.0238365	-0.788875	62/16_NK	NHS	26	251	270	Peptid 26 - standard	1.85	10.526	1.86143	0	0.75	0.25	0.9	0.9	0.9	Day B
15	B06	0.056	0.0152397	-0.807093	62/16_NK	NHS	32	311	330	Peptid 32 - standard	0.5	8.798	1.81212	0	0.55	0.45	0.8	0.7	0.7	Day B
15	B07	0.121	0.0850885	-0.711322	327_SSC	Patient	NA	NA	NA	Positive Control	NA	6.1	-0.0908091	NA	NA	NA	NA	NA	NA	Day B
15	B08	0.053	0.0120159	-0.81555	327_SSC	Patient	11	101	120	Peptid 11 - standard	1.625	3.75	-1.08923	0.5	0.5	0	0.45	1	1	Day B
15	B09	0.102	0.0646712	-0.732509	327_SSC	Patient	14	131	150	Peptid 14 - standard	0.895	6.155	-0.140134	0	0.85	0.15	1	0.75	0.75	Day B
15	B10	0.884	0.905006	-0.0907554	327_SSC	Patient	20	191	210	Peptid 20 - standard	-1.13	6.782	-0.637957	1	0	0	0	0.7	0.7	Day B
15	B11	0.048	0.00664296	-0.833727	327_SSC	Patient	26	251	270	Peptid 26 - standard	1.85	10.526	1.86143	0	0.75	0.25	0.9	0.9	0.9	Day B
15	B12	0.059	0.0184635	-0.799678	327_SSC	Patient	32	311	330	Peptid 32 - standard	0.5	8.798	1.81212	0	0.55	0.45	0.8	0.7	0.7	Day B
15	C01	0.055	0.0141651	-0.809776	62/16_NK	NHS	1	1	20	Peptid 1 - standard	0.715	3.737	-3.91814	1	0	0	0	0.85	0.85	Day B
15	C02	0.056	0.0152397	-0.807093	62/16_NK	NHS	12	111	130	Peptid 12 - alternative	1.155	6.161	-0.138536	0.75	0.25	0	0	1	1	Day B
15	C03	0.068	0.0281349	-0.781217	62/16_NK	NHS	15	141	160	Peptid 15 - alternative	0.75	7.353	0.0262035	0	0.35	0.65	0.65	0.95	0.95	Day B
15	C04	0.084	0.0453284	-0.755729	62/16_NK	NHS	21	201	220	Peptid 21 - standard	-0.2	9.501	2.02619	0.6	0.4	0	0.25	1	1	Day B
15	C05	0.054	0.0130905	-0.812589	62/16_NK	NHS	27	261	280	Peptid 27 - standard	1.92	5.29	-0.972198	0.15	0.85	0	0.85	1	1	Day B
15	C06	0.064	0.0238365	-0.788875	62/16_NK	NHS	33	321	340	Peptid 33 - standard	0.25	11.38	2.86142	0	0.05	0.95	0.3	0.65	0.65	Day B
15	C07	0.08	0.04103	-0.761533	327_SSC	Patient	1	1	20	Peptid 1 - standard	0.715	3.737	-3.91814	1	0	0	0	0.85	0.85	Day B
15	C08	0.063	0.0227619	-0.790912	327_SSC	Patient	12	111	130	Peptid 12 - alternative	1.155	6.161	-0.138536	0.75	0.25	0	0	1	1	Day B
15	C09	0.071	0.0313587	-0.775899	327_SSC	Patient	15	141	160	Peptid 15 - alternative	0.75	7.353	0.0262035	0	0.35	0.65	0.65	0.95	0.95	Day B
15	C10	0.14	0.105506	-0.692212	327_SSC	Patient	21	201	220	Peptid 21 - standard	-0.2	9.501	2.02619	0.6	0.4	0	0.25	1	1	Day B
15	C11	0.085	0.046403	-0.754323	327_SSC	Patient	27	261	280	Peptid 27 - standard	1.92	5.29	-0.972198	0.15	0.85	0	0.85	1	1	Day B
15	C12	0.06	0.0195381	-0.797382	327_SSC	Patient	33	321	340	Peptid 33 - standard	0.25	11.38	2.86142	0	0.05	0.95	0.3	0.65	0.65	Day B
15	D01	0.08	0.04103	-0.761533	62/16_NK	NHS	2	11	30	Peptid 2 - standard	-0.13	3.295	-4.08764	1	0	0	0	0.65	0.65	Day B
15	D02	0.055	0.0141651	-0.809776	62/16_NK	NHS	8	71	90	Peptid 8 - standard	0.305	10.398	0.910742	0	0.55	0.45	0.6	0.9	0.9	Day B
15	D03	0.073	0.0335079	-0.772519	62/16_NK	NHS	16	151	170	Peptid 16 - alternative	-0.105	12.204	3.0739	0	0.05	0.95	0.35	0.75	0.75	Day B
15	D04	0.144	0.109804	-0.688382	62/16_NK	NHS	17	161	180	Peptid 17 - alternative	0.62	10.518	2.81369	0	0.55	0.45	0.7	0.8	0.8	Day B
15	D05	0.237	0.209742	-0.609661	62/16_NK	NHS	28	271	290	Peptid 28 - standard	1.21	5.406	-0.970632	0.65	0.35	0	0.35	0.95	0.95	Day B
15	D06	0.065	0.0249111	-0.786891	62/16_NK	NHS	34	331	350	Peptid 34 - standard	-0.485	12.199	2.86142	0	0	1	0	0.45	0.45	Day B
15	D07	0.091	0.0528506	-0.746211	327_SSC	Patient	2	11	30	Peptid 2 - standard	-0.13	3.295	-4.08764	1	0	0	0	0.65	0.65	Day B
15	D08	0.055	0.0141651	-0.809776	327_SSC	Patient	8	71	90	Peptid 8 - standard	0.305	10.398	0.910742	0	0.55	0.45	0.6	0.9	0.9	Day B
15	D09	0.06	0.0195381	-0.797382	327_SSC	Patient	16	151	170	Peptid 16 - alternative	-0.105	12.204	3.0739	0	0.05	0.95	0.35	0.75	0.75	Day B
15	D10	0.214	0.185026	-0.627874	327_SSC	Patient	17	161	180	Peptid 17 - alternative	0.62	10.518	2.81369	0	0.55	0.45	0.7	0.8	0.8	Day B
15	D11	0.269	0.244129	-0.585072	327_SSC	Patient	28	271	290	Peptid 28 - standard	1.21	5.406	-0.970632	0.65	0.35	0	0.35	0.95	0.95	Day B
15	D12	0.059	0.0184635	-0.799678	327_SSC	Patient	34	331	350	Peptid 34 - standard	-0.485	12.199	2.86142	0	0	1	0	0.45	0.45	Day B
15	E01	0.285	0.261322	-0.573015	62/16_NK	NHS	3	21	40	Peptid 3 - standard	-1.26	3.226	-5.18152	1	0	0	0	0.45	0.45	Day B
15	E02	0.073	0.0335079	-0.772519	62/16_NK	NHS	9	81	100	Peptid 9 - standard	0.2	7.552	0.0786615	0	0.55	0.45	0.65	0.9	0.9	Day B
15	E03	0.055	0.0141651	-0.809776	62/16_NK	NHS	15	141	160	Peptid 15 - standard	0.75	7.353	0.0262035	0	0.35	0.65	0.65	0.95	0.95	Day B
15	E04	0.171	0.138818	-0.663819	62/16_NK	NHS	23	221	240	Peptid 23 - alternative	1.925	7.352	0.0246369	0	0.65	0.35	0.95	1	1	Day B
15	E05	0.111	0.0743425	-0.722151	62/16_NK	NHS	24	231	250	Peptid 24 - alternative	0.505	10.134	3.02459	0	0.15	0.85	0.45	0.8	0.8	Day B
15	E06	0.09	0.051776	-0.747528	62/16_NK	NHS	35	341	360	Peptid 35 - standard	-2.005	12.023	1.91229	0	0	1	0	0	0	Day B
15	E07	0.289	0.265621	-0.570019	327_SSC	Patient	3	21	40	Peptid 3 - standard	-1.26	3.226	-5.18152	1	0	0	0	0.45	0.45	Day B
15	E08	0.064	0.0238365	-0.788875	327_SSC	Patient	9	81	100	Peptid 9 - standard	0.2	7.552	0.0786615	0	0.55	0.45	0.65	0.9	0.9	Day B
15	E09	0.069	0.0292095	-0.779408	327_SSC	Patient	15	141	160	Peptid 15 - standard	0.75	7.353	0.0262035	0	0.35	0.65	0.65	0.95	0.95	Day B
15	E10	0.228	0.20007	-0.616724	327_SSC	Patient	23	221	240	Peptid 23 - alternative	1.925	7.352	0.0246369	0	0.65	0.35	0.95	1	1	Day B
15	E11	0.097	0.0592982	-0.738574	327_SSC	Patient	24	231	250	Peptid 24 - alternative	0.505	10.134	3.02459	0	0.15	0.85	0.45	0.8	0.8	Day B
15	E12	0.058	0.0173889	-0.802056	327_SSC	Patient	35	341	360	Peptid 35 - standard	-2.005	12.023	1.91229	0	0	1	0	0	0	Day B
15	F01	0.696	0.702982	-0.260587	62/16_NK	NHS	4	31	50	Peptid 4 - standard	-0.955	3.295	-4.22766	1	0	0	0	0.7	0.7	Day B
15	F02	0.088	0.0496268	-0.750201	62/16_NK	NHS	10	91	110	Peptid 10 - standard	1.82	5.292	-0.922889	0	1	0	0.95	1	1	Day B
15	F03	0.077	0.0378063	-0.766097	62/16_NK	NHS	16	151	170	Peptid 16 - standard	-0.105	12.204	3.0739	0	0.05	0.95	0.35	0.75	0.75	Day B
15	F04	0.057	0.0163143	-0.804524	62/16_NK	NHS	22	211	230	Peptid 22 - standard	1.5	12.5	1.90916	0.1	0.9	0	0.75	1	1	Day B
15	F05	0.054	0.0130905	-0.812589	62/16_NK	NHS	26	251	270	Peptid 26 - alternative	1.85	10.526	1.86143	0	0.75	0.25	0.9	0.9	0.9	Day B
15	F06	0.052	0.0109413	-0.818683	62/16_NK	NHS	NK	NA	NA	Negative Control	NA	6.1	-0.0908091	NA	NA	NA	NA	NA	NA	Day B
15	F07	0.635	0.637431	-0.310492	327_SSC	Patient	4	31	50	Peptid 4 - standard	-0.955	3.295	-4.22766	1	0	0	0	0.7	0.7	Day B
15	F08	0.104	0.0668204	-0.730149	327_SSC	Patient	10	91	110	Peptid 10 - standard	1.82	5.292	-0.922889	0	1	0	0.95	1	1	Day B
15	F09	0.094	0.0560744	-0.742339	327_SSC	Patient	16	151	170	Peptid 16 - standard	-0.105	12.204	3.0739	0	0.05	0.95	0.35	0.75	0.75	Day B
15	F10	0.078	0.0388809	-0.764554	327_SSC	Patient	22	211	230	Peptid 22 - standard	1.5	12.5	1.90916	0.1	0.9	0	0.75	1	1	Day B
15	F11	0.053	0.0120159	-0.81555	327_SSC	Patient	26	251	270	Peptid 26 - alternative	1.85	10.526	1.86143	0	0.75	0.25	0.9	0.9	0.9	Day B
15	F12	0.055	0.0141651	-0.809776	327_SSC	Patient	NK	NA	NA	Negative Control	NA	6.1	-0.0908091	NA	NA	NA	NA	NA	NA	Day B
15	G01	0.114	0.0775663	-0.718834	62/16_NK	NHS	5	41	60	Peptid 5 - standard	-0.055	4.109	-1.13697	0.65	0.35	0	0.3	0.85	0.85	Day B
15	G02	0.08	0.04103	-0.761533	62/16_NK	NHS	11	101	120	Peptid 11 - standard	1.625	3.75	-1.08923	0.5	0.5	0	0.45	1	1	Day B
15	G03	0.095	0.057149	-0.741073	62/16_NK	NHS	17	161	180	Peptid 17 - standard	0.62	10.518	2.81369	0	0.55	0.45	0.7	0.8	0.8	Day B
15	G04	0.065	0.0249111	-0.786891	62/16_NK	NHS	23	221	240	Peptid 23 - standard	1.925	7.352	0.0246369	0	0.65	0.35	0.95	1	1	Day B
15	G05	0.061	0.0206127	-0.79516	62/16_NK	NHS	29	281	300	Peptid 29 - standard	-0.36	8.545	0.864581	0.9	0.1	0	0.05	0.75	0.75	Day B
15	G06	0.167	0.13452	-0.667337	62/16_NK	NHS	31	301	320	Peptid 31 - alternative	0.845	7.249	-0.0230898	0	1	0	1	0.95	0.95	Day B
15	G07	0.275	0.250576	-0.580535	327_SSC	Patient	5	41	60	Peptid 5 - standard	-0.055	4.109	-1.13697	0.65	0.35	0	0.3	0.85	0.85	Day B
15	G08	0.074	0.0345825	-0.770874	327_SSC	Patient	11	101	120	Peptid 11 - standard	1.625	3.75	-1.08923	0.5	0.5	0	0.45	1	1	Day B
15	G09	0.068	0.0281349	-0.781217	327_SSC	Patient	17	161	180	Peptid 17 - standard	0.62	10.518	2.81369	0	0.55	0.45	0.7	0.8	0.8	Day B
15	G10	0.071	0.0313587	-0.775899	327_SSC	Patient	23	221	240	Peptid 23 - standard	1.925	7.352	0.0246369	0	0.65	0.35	0.95	1	1	Day B
15	G11	0.058	0.0173889	-0.802056	327_SSC	Patient	29	281	300	Peptid 29 - standard	-0.36	8.545	0.864581	0.9	0.1	0	0.05	0.75	0.75	Day B
15	G12	0.151	0.117326	-0.681812	327_SSC	Patient	31	301	320	Peptid 31 - alternative	0.845	7.249	-0.0230898	0	1	0	1	0.95	0.95	Day B
15	H01	0.225	0.196847	-0.619096	62/16_NK	NHS	6	51	70	Peptid 6 - standard	1.495	6.332	-0.090825	0.15	0.85	0	0.8	0.9	0.9	Day B
15	H02	0.128	0.0926107	-0.704085	62/16_NK	NHS	12	111	130	Peptid 12 - standard	1.155	6.161	-0.138536	0.75	0.25	0	0	1	1	Day B
15	H03	0.143	0.10873	-0.689334	62/16_NK	NHS	18	171	190	Peptid 18 - standard	2.07	3.75	-1.18468	0.05	0.95	0	0.9	1	1	Day B
15	H04	0.066	0.0259857	-0.784956	62/16_NK	NHS	24	231	250	Peptid 24 - standard	0.505	10.134	3.02459	0	0.15	0.85	0.45	0.8	0.8	Day B
15	H05	0.059	0.0184635	-0.799678	62/16_NK	NHS	30	291	310	Peptid 30 - standard	-0.43	9.299	1.0755	0.4	0.6	0	0.55	0.75	0.75	Day B
15	H06	0.06	0.0195381	-0.797382	62/16_NK	NHS	36	351	370	Peptid 36 - standard	-1.26667	4.426	-1.08768	0	0	1	0	0	0	Day B
15	H07	0.3	0.277441	-0.561816	327_SSC	Patient	6	51	70	Peptid 6 - standard	1.495	6.332	-0.090825	0.15	0.85	0	0.8	0.9	0.9	Day B
15	H08	0.213	0.183951	-0.628678	327_SSC	Patient	12	111	130	Peptid 12 - standard	1.155	6.161	-0.138536	0.75	0.25	0	0	1	1	Day B
15	H09	0.106	0.0689696	-0.727824	327_SSC	Patient	18	171	190	Peptid 18 - standard	2.07	3.75	-1.18468	0.05	0.95	0	0.9	1	1	Day B
15	H10	0.06	0.0195381	-0.797382	327_SSC	Patient	24	231	250	Peptid 24 - standard	0.505	10.134	3.02459	0	0.15	0.85	0.45	0.8	0.8	Day B
15	H11	0.188	0.157086	-0.649241	327_SSC	Patient	30	291	310	Peptid 30 - standard	-0.43	9.299	1.0755	0.4	0.6	0	0.55	0.75	0.75	Day B
15	H12	0.075	0.0356571	-0.769256	327_SSC	Patient	36	351	370	Peptid 36 - standard	-1.26667	4.426	-1.08768	0	0	1	0	0	0	Day B
16	A01	0.181	0.182616	-0.62968	384_SSC	Patient	7	61	80	Peptid 7 - alternative	2.035	6.1	-0.0908091	0	1	0	0.95	0.95	0.95	Day C
16	A02	0.188	0.192948	-0.621976	384_SSC	Patient	7	61	80	Peptid 7 - standard	2.035	6.1	-0.0908091	0	1	0	0.95	0.95	0.95	Day C
16	A03	0.184	0.187044	-0.626366	384_SSC	Patient	13	121	140	Peptid 13 - standard	1.06	8.523	0.858299	0.25	0.75	0	0.5	0.75	0.75	Day C
16	A04	0.196	0.204755	-0.613293	384_SSC	Patient	19	181	200	Peptid 19 - standard	0.31	5.361	-1.7534	0.55	0.45	0	0.4	0.7	0.7	Day C
16	A05	0.585	0.778902	-0.199917	384_SSC	Patient	25	241	260	Peptid 25 - standard	0.845	13.102	4.90911	0	0.25	0.75	0.4	0.7	0.7	Day C
16	A06	0.198	0.207707	-0.611141	384_SSC	Patient	31	301	320	Peptid 31 - standard	0.845	7.249	-0.0230898	0	1	0	1	0.95	0.95	Day C
16	A07	0.103	0.0674914	-0.729419	332_SSC	Patient	7	61	80	Peptid 7 - alternative	2.035	6.1	-0.0908091	0	1	0	0.95	0.95	0.95	Day C
16	A08	0.128	0.10439	-0.693216	332_SSC	Patient	7	61	80	Peptid 7 - standard	2.035	6.1	-0.0908091	0	1	0	0.95	0.95	0.95	Day C
16	A09	0.133	0.11177	-0.686649	332_SSC	Patient	13	121	140	Peptid 13 - standard	1.06	8.523	0.858299	0.25	0.75	0	0.5	0.75	0.75	Day C
16	A10	0.26	0.299216	-0.546812	332_SSC	Patient	19	181	200	Peptid 19 - standard	0.31	5.361	-1.7534	0.55	0.45	0	0.4	0.7	0.7	Day C
16	A11	0.385	0.483711	-0.420716	332_SSC	Patient	25	241	260	Peptid 25 - standard	0.845	13.102	4.90911	0	0.25	0.75	0.4	0.7	0.7	Day C
16	A12	0.163	0.156049	-0.650054	332_SSC	Patient	31	301	320	Peptid 31 - standard	0.845	7.249	-0.0230898	0	1	0	1	0.95	0.95	Day C
16	B01	0.668	0.901406	-0.0940382	384_SSC	Patient	NA	NA	NA	Positive Control	NA	6.1	-0.0908091	NA	NA	NA	NA	NA	NA	Day C
16	B02	0.191	0.197375	-0.618706	384_SSC	Patient	11	101	120	Peptid 11 - standard	1.625	3.75	-1.08923	0.5	0.5	0	0.45	1	1	Day C
16	B03	0.192	0.198851	-0.61762	384_SSC	Patient	14	131	150	Peptid 14 - standard	0.895	6.155	-0.140134	0	0.85	0.15	1	0.75	0.75	Day C
16	B04	0.209	0.223943	-0.599418	384_SSC	Patient	20	191	210	Peptid 20 - standard	-1.13	6.782	-0.637957	1	0	0	0	0.7	0.7	Day C
16	B05	0.265	0.306596	-0.541752	384_SSC	Patient	26	251	270	Peptid 26 - standard	1.85	10.526	1.86143	0	0.75	0.25	0.9	0.9	0.9	Day C
16	B06	0.195	0.203279	-0.614372	384_SSC	Patient	32	311	330	Peptid 32 - standard	0.5	8.798	1.81212	0	0.55	0.45	0.8	0.7	0.7	Day C
16	B07	0.641	0.861555	-0.12969	332_SSC	Patient	NA	NA	NA	Positive Control	NA	6.1	-0.0908091	NA	NA	NA	NA	NA	NA	Day C
16	B08	0.114	0.0837269	-0.71266	332_SSC	Patient	11	101	120	Peptid 11 - standard	1.625	3.75	-1.08923	0.5	0.5	0	0.45	1	1	Day C
16	B09	0.114	0.0837269	-0.71266	332_SSC	Patient	14	131	150	Peptid 14 - standard	0.895	6.155	-0.140134	0	0.85	0.15	1	0.75	0.75	Day C
16	B10	0.117	0.0881548	-0.708341	332_SSC	Patient	20	191	210	Peptid 20 - standard	-1.13	6.782	-0.637957	1	0	0	0	0.7	0.7	Day C
16	B11	0.132	0.110294	-0.687949	332_SSC	Patient	26	251	270	Peptid 26 - standard	1.85	10.526	1.86143	0	0.75	0.25	0.9	0.9	0.9	Day C
16	B12	0.183	0.185568	-0.627468	332_SSC	Patient	32	311	330	Peptid 32 - standard	0.5	8.798	1.81212	0	0.55	0.45	0.8	0.7	0.7	Day C
16	C01	0.193	0.200327	-0.616535	384_SSC	Patient	1	1	20	Peptid 1 - standard	0.715	3.737	-3.91814	1	0	0	0	0.85	0.85	Day C
16	C02	0.199	0.209183	-0.610067	384_SSC	Patient	12	111	130	Peptid 12 - alternative	1.155	6.161	-0.138536	0.75	0.25	0	0	1	1	Day C
16	C03	0.229	0.253462	-0.578511	384_SSC	Patient	15	141	160	Peptid 15 - alternative	0.75	7.353	0.0262035	0	0.35	0.65	0.65	0.95	0.95	Day C
16	C04	0.237	0.265269	-0.570264	384_SSC	Patient	21	201	220	Peptid 21 - standard	-0.2	9.501	2.02619	0.6	0.4	0	0.25	1	1	Day C
16	C05	0.213	0.229847	-0.595198	384_SSC	Patient	27	261	280	Peptid 27 - standard	1.92	5.29	-0.972198	0.15	0.85	0	0.85	1	1	Day C
16	C06	0.359	0.445336	-0.447186	384_SSC	Patient	33	321	340	Peptid 33 - standard	0.25	11.38	2.86142	0	0.05	0.95	0.3	0.65	0.65	Day C
16	C07	0.107	0.0733952	-0.723137	332_SSC	Patient	1	1	20	Peptid 1 - standard	0.715	3.737	-3.91814	1	0	0	0	0.85	0.85	Day C
16	C08	0.094	0.0542078	-0.744568	332_SSC	Patient	12	111	130	Peptid 12 - alternative	1.155	6.161	-0.138536	0.75	0.25	0	0	1	1	Day C
16	C09	0.139	0.120626	-0.678979	332_SSC	Patient	15	141	160	Peptid 15 - alternative	0.75	7.353	0.0262035	0	0.35	0.65	0.65	0.95	0.95	Day C
16	C10	0.219	0.238702	-0.588907	332_SSC	Patient	21	201	220	Peptid 21 - standard	-0.2	9.501	2.02619	0.6	0.4	0	0.25	1	1	Day C
16	C11	0.131	0.108818	-0.689255	332_SSC	Patient	27	261	280	Peptid 27 - standard	1.92	5.29	-0.972198	0.15	0.85	0	0.85	1	1	Day C
16	C12	0.327	0.398105	-0.479448	332_SSC	Patient	33	321	340	Peptid 33 - standard	0.25	11.38	2.86142	0	0.05	0.95	0.3	0.65	0.65	Day C
16	D01	0.199	0.209183	-0.610067	384_SSC	Patient	2	11	30	Peptid 2 - standard	-0.13	3.295	-4.08764	1	0	0	0	0.65	0.65	Day C
16	D02	0.194	0.201803	-0.615453	384_SSC	Patient	8	71	90	Peptid 8 - standard	0.305	10.398	0.910742	0	0.55	0.45	0.6	0.9	0.9	Day C
16	D03	0.494	0.64459	-0.305141	384_SSC	Patient	16	151	170	Peptid 16 - alternative	-0.105	12.204	3.0739	0	0.05	0.95	0.35	0.75	0.75	Day C
16	D04	0.192	0.198851	-0.61762	384_SSC	Patient	17	161	180	Peptid 17 - alternative	0.62	10.518	2.81369	0	0.55	0.45	0.7	0.8	0.8	Day C
16	D05	0.18	0.18114	-0.63079	384_SSC	Patient	28	271	290	Peptid 28 - standard	1.21	5.406	-0.970632	0.65	0.35	0	0.35	0.95	0.95	Day C
16	D06	0.628	0.842368	-0.146421	384_SSC	Patient	34	331	350	Peptid 34 - standard	-0.485	12.199	2.86142	0	0	1	0	0.45	0.45	Day C
16	D07	0.116	0.0866788	-0.70977	332_SSC	Patient	2	11	30	Peptid 2 - standard	-0.13	3.295	-4.08764	1	0	0	0	0.65	0.65	Day C
16	D08	0.11	0.0778231	-0.718573	332_SSC	Patient	8	71	90	Peptid 8 - standard	0.305	10.398	0.910742	0	0.55	0.45	0.6	0.9	0.9	Day C
16	D09	0.256	0.293313	-0.550868	332_SSC	Patient	16	151	170	Peptid 16 - alternative	-0.105	12.204	3.0739	0	0.05	0.95	0.35	0.75	0.75	Day C
16	D10	0.164	0.157525	-0.648898	332_SSC	Patient	17	161	180	Peptid 17 - alternative	0.62	10.518	2.81369	0	0.55	0.45	0.7	0.8	0.8	Day C
16	D11	0.103	0.0674914	-0.729419	332_SSC	Patient	28	271	290	Peptid 28 - standard	1.21	5.406	-0.970632	0.65	0.35	0	0.35	0.95	0.95	Day C
16	D12	0.544	0.718388	-0.248542	332_SSC	Patient	34	331	350	Peptid 34 - standard	-0.485	12.199	2.86142	0	0	1	0	0.45	0.45	Day C
16	E01	0.179	0.179664	-0.631902	384_SSC	Patient	3	21	40	Peptid 3 - standard	-1.26	3.226	-5.18152	1	0	0	0	0.45	0.45	Day C
16	E02	0.23	0.254938	-0.577477	384_SSC	Patient	9	81	100	Peptid 9 - standard	0.2	7.552	0.0786615	0	0.55	0.45	0.65	0.9	0.9	Day C
16	E03	0.224	0.246082	-0.583696	384_SSC	Patient	15	141	160	Peptid 15 - standard	0.75	7.353	0.0262035	0	0.35	0.65	0.65	0.95	0.95	Day C
16	E04	0.154	0.142765	-0.660621	384_SSC	Patient	23	221	240	Peptid 23 - alternative	1.925	7.352	0.0246369	0	0.65	0.35	0.95	1	1	Day C
16	E05	0.154	0.142765	-0.660621	384_SSC	Patient	24	231	250	Peptid 24 - alternative	0.505	10.134	3.02459	0	0.15	0.85	0.45	0.8	0.8	Day C
16	E06	0.156	0.145717	-0.658247	384_SSC	Patient	35	341	360	Peptid 35 - standard	-2.005	12.023	1.91229	0	0	1	0	0	0	Day C
16	E07	0.103	0.0674914	-0.729419	332_SSC	Patient	3	21	40	Peptid 3 - standard	-1.26	3.226	-5.18152	1	0	0	0	0.45	0.45	Day C
16	E08	0.112	0.080775	-0.715593	332_SSC	Patient	9	81	100	Peptid 9 - standard	0.2	7.552	0.0786615	0	0.55	0.45	0.65	0.9	0.9	Day C
16	E09	0.138	0.11915	-0.680243	332_SSC	Patient	15	141	160	Peptid 15 - standard	0.75	7.353	0.0262035	0	0.35	0.65	0.65	0.95	0.95	Day C
16	E10	0.074	0.0246887	-0.787298	332_SSC	Patient	23	221	240	Peptid 23 - alternative	1.925	7.352	0.0246369	0	0.65	0.35	0.95	1	1	Day C
16	E11	0.077	0.0291166	-0.779563	332_SSC	Patient	24	231	250	Peptid 24 - alternative	0.505	10.134	3.02459	0	0.15	0.85	0.45	0.8	0.8	Day C
16	E12	0.075	0.0261647	-0.784638	332_SSC	Patient	35	341	360	Peptid 35 - standard	-2.005	12.023	1.91229	0	0	1	0	0	0	Day C
16	F01	0.146	0.130957	-0.670281	384_SSC	Patient	4	31	50	Peptid 4 - standard	-0.955	3.295	-4.22766	1	0	0	0	0.7	0.7	Day C
16	F02	0.147	0.132433	-0.669058	384_SSC	Patient	10	91	110	Peptid 10 - standard	1.82	5.292	-0.922889	0	1	0	0.95	1	1	Day C
16	F03	0.256	0.293313	-0.550868	384_SSC	Patient	16	151	170	Peptid 16 - standard	-0.105	12.204	3.0739	0	0.05	0.95	0.35	0.75	0.75	Day C
16	F04	0.159	0.150145	-0.654715	384_SSC	Patient	22	211	230	Peptid 22 - standard	1.5	12.5	1.90916	0.1	0.9	0	0.75	1	1	Day C
16	F05	0.173	0.170808	-0.638626	384_SSC	Patient	26	251	270	Peptid 26 - alternative	1.85	10.526	1.86143	0	0.75	0.25	0.9	0.9	0.9	Day C
16	F06	0.13	0.107342	-0.690569	384_SSC	Patient	NK	NA	NA	Negative Control	NA	6.1	-0.0908091	NA	NA	NA	NA	NA	NA	Day C
16	F07	0.092	0.0512559	-0.748169	332_SSC	Patient	4	31	50	Peptid 4 - standard	-0.955	3.295	-4.22766	1	0	0	0	0.7	0.7	Day C
16	F08	0.08	0.0335444	-0.772463	332_SSC	Patient	10	91	110	Peptid 10 - standard	1.82	5.292	-0.922889	0	1	0	0.95	1	1	Day C
16	F09	0.13	0.107342	-0.690569	332_SSC	Patient	16	151	170	Peptid 16 - standard	-0.105	12.204	3.0739	0	0.05	0.95	0.35	0.75	0.75	Day C
16	F10	0.103	0.0674914	-0.729419	332_SSC	Patient	22	211	230	Peptid 22 - standard	1.5	12.5	1.90916	0.1	0.9	0	0.75	1	1	Day C
16	F11	0.072	0.0217368	-0.792907	332_SSC	Patient	26	251	270	Peptid 26 - alternative	1.85	10.526	1.86143	0	0.75	0.25	0.9	0.9	0.9	Day C
16	F12	0.081	0.0350204	-0.770211	332_SSC	Patient	NK	NA	NA	Negative Control	NA	6.1	-0.0908091	NA	NA	NA	NA	NA	NA	Day C
16	G01	0.178	0.178188	-0.633016	384_SSC	Patient	5	41	60	Peptid 5 - standard	-0.055	4.109	-1.13697	0.65	0.35	0	0.3	0.85	0.85	Day C
16	G02	0.155	0.144241	-0.659432	384_SSC	Patient	11	101	120	Peptid 11 - standard	1.625	3.75	-1.08923	0.5	0.5	0	0.45	1	1	Day C
16	G03	0.372	0.464523	-0.433987	384_SSC	Patient	17	161	180	Peptid 17 - standard	0.62	10.518	2.81369	0	0.55	0.45	0.7	0.8	0.8	Day C
16	G04	0.173	0.170808	-0.638626	384_SSC	Patient	23	221	240	Peptid 23 - standard	1.925	7.352	0.0246369	0	0.65	0.35	0.95	1	1	Day C
16	G05	0.14	0.122102	-0.677721	384_SSC	Patient	29	281	300	Peptid 29 - standard	-0.36	8.545	0.864581	0.9	0.1	0	0.05	0.75	0.75	Day C
16	G06	0.137	0.117674	-0.681512	384_SSC	Patient	31	301	320	Peptid 31 - alternative	0.845	7.249	-0.0230898	0	1	0	1	0.95	0.95	Day C
16	G07	0.106	0.0719193	-0.724686	332_SSC	Patient	5	41	60	Peptid 5 - standard	-0.055	4.109	-1.13697	0.65	0.35	0	0.3	0.85	0.85	Day C
16	G08	0.088	0.0453521	-0.755698	332_SSC	Patient	11	101	120	Peptid 11 - standard	1.625	3.75	-1.08923	0.5	0.5	0	0.45	1	1	Day C
16	G09	0.293	0.347923	-0.513565	332_SSC	Patient	17	161	180	Peptid 17 - standard	0.62	10.518	2.81369	0	0.55	0.45	0.7	0.8	0.8	Day C
16	G10	0.101	0.0645395	-0.732654	332_SSC	Patient	23	221	240	Peptid 23 - standard	1.925	7.352	0.0246369	0	0.65	0.35	0.95	1	1	Day C
16	G11	0.063	0.0084532	-0.826786	332_SSC	Patient	29	281	300	Peptid 29 - standard	-0.36	8.545	0.864581	0.9	0.1	0	0.05	0.75	0.75	Day C
16	G12	0.08	0.0335444	-0.772463	332_SSC	Patient	31	301	320	Peptid 31 - alternative	0.845	7.249	-0.0230898	0	1	0	1	0.95	0.95	Day C
16	H01	0.13	0.107342	-0.690569	384_SSC	Patient	6	51	70	Peptid 6 - standard	1.495	6.332	-0.090825	0.15	0.85	0	0.8	0.9	0.9	Day C
16	H02	0.152	0.139813	-0.66301	384_SSC	Patient	12	111	130	Peptid 12 - standard	1.155	6.161	-0.138536	0.75	0.25	0	0	1	1	Day C
16	H03	0.126	0.101438	-0.695892	384_SSC	Patient	18	171	190	Peptid 18 - standard	2.07	3.75	-1.18468	0.05	0.95	0	0.9	1	1	Day C
16	H04	0.467	0.604739	-0.334645	384_SSC	Patient	24	231	250	Peptid 24 - standard	0.505	10.134	3.02459	0	0.15	0.85	0.45	0.8	0.8	Day C
16	H05	0.15	0.136861	-0.665416	384_SSC	Patient	30	291	310	Peptid 30 - standard	-0.43	9.299	1.0755	0.4	0.6	0	0.55	0.75	0.75	Day C
16	H06	0.155	0.144241	-0.659432	384_SSC	Patient	36	351	370	Peptid 36 - standard	-1.26667	4.426	-1.08768	0	0	1	0	0	0	Day C
16	H07	0.077	0.0291166	-0.779563	332_SSC	Patient	6	51	70	Peptid 6 - standard	1.495	6.332	-0.090825	0.15	0.85	0	0.8	0.9	0.9	Day C
16	H08	0.063	0.0084532	-0.826786	332_SSC	Patient	12	111	130	Peptid 12 - standard	1.155	6.161	-0.138536	0.75	0.25	0	0	1	1	Day C
16	H09	0.073	0.0232128	-0.790051	332_SSC	Patient	18	171	190	Peptid 18 - standard	2.07	3.75	-1.18468	0.05	0.95	0	0.9	1	1	Day C
16	H10	0.242	0.272649	-0.565136	332_SSC	Patient	24	231	250	Peptid 24 - standard	0.505	10.134	3.02459	0	0.15	0.85	0.45	0.8	0.8	Day C
16	H11	0.083	0.0379723	-0.765857	332_SSC	Patient	30	291	310	Peptid 30 - standard	-0.43	9.299	1.0755	0.4	0.6	0	0.55	0.75	0.75	Day C
16	H12	0.073	0.0232128	-0.790051	332_SSC	Patient	36	351	370	Peptid 36 - standard	-1.26667	4.426	-1.08768	0	0	1	0	0	0	Day C
17	A01	0.044	0.517928	-0.396834	66/16_NK	NHS	7	61	80	Peptid 7 - alternative	2.035	6.1	-0.0908091	0	1	0	0.95	0.95	0.95	Day B
17	A02	0.04	0.298805	-0.547094	66/16_NK	NHS	7	61	80	Peptid 7 - standard	2.035	6.1	-0.0908091	0	1	0	0.95	0.95	0.95	Day B
17	A03	0.046	0.62749	-0.317885	66/16_NK	NHS	13	121	140	Peptid 13 - standard	1.06	8.523	0.858299	0.25	0.75	0	0.5	0.75	0.75	Day B
17	A04	0.039	0.244024	-0.585146	66/16_NK	NHS	19	181	200	Peptid 19 - standard	0.31	5.361	-1.7534	0.55	0.45	0	0.4	0.7	0.7	Day B
17	A05	0.039	0.244024	-0.585146	66/16_NK	NHS	25	241	260	Peptid 25 - standard	0.845	13.102	4.90911	0	0.25	0.75	0.4	0.7	0.7	Day B
17	A06	0.039	0.244024	-0.585146	66/16_NK	NHS	31	301	320	Peptid 31 - standard	0.845	7.249	-0.0230898	0	1	0	1	0.95	0.95	Day B
17	A07	0.038	0.189243	-0.624727	332_SSC	Patient	7	61	80	Peptid 7 - alternative	2.035	6.1	-0.0908091	0	1	0	0.95	0.95	0.95	Day B
17	A08	0.039	0.244024	-0.585146	332_SSC	Patient	7	61	80	Peptid 7 - standard	2.035	6.1	-0.0908091	0	1	0	0.95	0.95	0.95	Day B
17	A09	0.04	0.298805	-0.547094	332_SSC	Patient	13	121	140	Peptid 13 - standard	1.06	8.523	0.858299	0.25	0.75	0	0.5	0.75	0.75	Day B
17	A10	0.039	0.244024	-0.585146	332_SSC	Patient	19	181	200	Peptid 19 - standard	0.31	5.361	-1.7534	0.55	0.45	0	0.4	0.7	0.7	Day B
17	A11	0.042	0.408367	-0.47246	332_SSC	Patient	25	241	260	Peptid 25 - standard	0.845	13.102	4.90911	0	0.25	0.75	0.4	0.7	0.7	Day B
17	A12	0.041	0.353586	-0.509715	332_SSC	Patient	31	301	320	Peptid 31 - standard	0.845	7.249	-0.0230898	0	1	0	1	0.95	0.95	Day B
17	B01	0.041	0.353586	-0.509715	66/16_NK	NHS	NA	NA	NA	Positive Control	NA	6.1	-0.0908091	NA	NA	NA	NA	NA	NA	Day B
17	B02	0.039	0.244024	-0.585146	66/16_NK	NHS	11	101	120	Peptid 11 - standard	1.625	3.75	-1.08923	0.5	0.5	0	0.45	1	1	Day B
17	B03	0.041	0.353586	-0.509715	66/16_NK	NHS	14	131	150	Peptid 14 - standard	0.895	6.155	-0.140134	0	0.85	0.15	1	0.75	0.75	Day B
17	B04	0.041	0.353586	-0.509715	66/16_NK	NHS	20	191	210	Peptid 20 - standard	-1.13	6.782	-0.637957	1	0	0	0	0.7	0.7	Day B
17	B05	0.039	0.244024	-0.585146	66/16_NK	NHS	26	251	270	Peptid 26 - standard	1.85	10.526	1.86143	0	0.75	0.25	0.9	0.9	0.9	Day B
17	B06	0.045	0.572709	-0.357895	66/16_NK	NHS	32	311	330	Peptid 32 - standard	0.5	8.798	1.81212	0	0.55	0.45	0.8	0.7	0.7	Day B
17	B07	0.042	0.408367	-0.47246	332_SSC	Patient	NA	NA	NA	Positive Control	NA	6.1	-0.0908091	NA	NA	NA	NA	NA	NA	Day B
17	B08	0.041	0.353586	-0.509715	332_SSC	Patient	11	101	120	Peptid 11 - standard	1.625	3.75	-1.08923	0.5	0.5	0	0.45	1	1	Day B
17	B09	0.041	0.353586	-0.509715	332_SSC	Patient	14	131	150	Peptid 14 - standard	0.895	6.155	-0.140134	0	0.85	0.15	1	0.75	0.75	Day B
17	B10	0.041	0.353586	-0.509715	332_SSC	Patient	20	191	210	Peptid 20 - standard	-1.13	6.782	-0.637957	1	0	0	0	0.7	0.7	Day B
17	B11	0.041	0.353586	-0.509715	332_SSC	Patient	26	251	270	Peptid 26 - standard	1.85	10.526	1.86143	0	0.75	0.25	0.9	0.9	0.9	Day B
17	B12	0.04	0.298805	-0.547094	332_SSC	Patient	32	311	330	Peptid 32 - standard	0.5	8.798	1.81212	0	0.55	0.45	0.8	0.7	0.7	Day B
17	C01	0.041	0.353586	-0.509715	66/16_NK	NHS	1	1	20	Peptid 1 - standard	0.715	3.737	-3.91814	1	0	0	0	0.85	0.85	Day B
17	C02	0.041	0.353586	-0.509715	66/16_NK	NHS	12	111	130	Peptid 12 - alternative	1.155	6.161	-0.138536	0.75	0.25	0	0	1	1	Day B
17	C03	0.042	0.408367	-0.47246	66/16_NK	NHS	15	141	160	Peptid 15 - alternative	0.75	7.353	0.0262035	0	0.35	0.65	0.65	0.95	0.95	Day B
17	C04	0.039	0.244024	-0.585146	66/16_NK	NHS	21	201	220	Peptid 21 - standard	-0.2	9.501	2.02619	0.6	0.4	0	0.25	1	1	Day B
17	C05	0.039	0.244024	-0.585146	66/16_NK	NHS	27	261	280	Peptid 27 - standard	1.92	5.29	-0.972198	0.15	0.85	0	0.85	1	1	Day B
17	C06	0.039	0.244024	-0.585146	66/16_NK	NHS	33	321	340	Peptid 33 - standard	0.25	11.38	2.86142	0	0.05	0.95	0.3	0.65	0.65	Day B
17	C07	0.045	0.572709	-0.357895	332_SSC	Patient	1	1	20	Peptid 1 - standard	0.715	3.737	-3.91814	1	0	0	0	0.85	0.85	Day B
17	C08	0.048	0.737052	-0.233773	332_SSC	Patient	12	111	130	Peptid 12 - alternative	1.155	6.161	-0.138536	0.75	0.25	0	0	1	1	Day B
17	C09	0.044	0.517928	-0.396834	332_SSC	Patient	15	141	160	Peptid 15 - alternative	0.75	7.353	0.0262035	0	0.35	0.65	0.65	0.95	0.95	Day B
17	C10	0.045	0.572709	-0.357895	332_SSC	Patient	21	201	220	Peptid 21 - standard	-0.2	9.501	2.02619	0.6	0.4	0	0.25	1	1	Day B
17	C11	0.044	0.517928	-0.396834	332_SSC	Patient	27	261	280	Peptid 27 - standard	1.92	5.29	-0.972198	0.15	0.85	0	0.85	1	1	Day B
17	C12	0.044	0.517928	-0.396834	332_SSC	Patient	33	321	340	Peptid 33 - standard	0.25	11.38	2.86142	0	0.05	0.95	0.3	0.65	0.65	Day B
17	D01	0.045	0.572709	-0.357895	66/16_NK	NHS	2	11	30	Peptid 2 - standard	-0.13	3.295	-4.08764	1	0	0	0	0.65	0.65	Day B
17	D02	0.043	0.463147	-0.434936	66/16_NK	NHS	8	71	90	Peptid 8 - standard	0.305	10.398	0.910742	0	0.55	0.45	0.6	0.9	0.9	Day B
17	D03	0.041	0.353586	-0.509715	66/16_NK	NHS	16	151	170	Peptid 16 - alternative	-0.105	12.204	3.0739	0	0.05	0.95	0.35	0.75	0.75	Day B
17	D04	0.042	0.408367	-0.47246	66/16_NK	NHS	17	161	180	Peptid 17 - alternative	0.62	10.518	2.81369	0	0.55	0.45	0.7	0.8	0.8	Day B
17	D05	0.041	0.353586	-0.509715	66/16_NK	NHS	28	271	290	Peptid 28 - standard	1.21	5.406	-0.970632	0.65	0.35	0	0.35	0.95	0.95	Day B
17	D06	0.04	0.298805	-0.547094	66/16_NK	NHS	34	331	350	Peptid 34 - standard	-0.485	12.199	2.86142	0	0	1	0	0.45	0.45	Day B
17	D07	0.039	0.244024	-0.585146	332_SSC	Patient	2	11	30	Peptid 2 - standard	-0.13	3.295	-4.08764	1	0	0	0	0.65	0.65	Day B
17	D08	0.039	0.244024	-0.585146	332_SSC	Patient	8	71	90	Peptid 8 - standard	0.305	10.398	0.910742	0	0.55	0.45	0.6	0.9	0.9	Day B
17	D09	0.04	0.298805	-0.547094	332_SSC	Patient	16	151	170	Peptid 16 - alternative	-0.105	12.204	3.0739	0	0.05	0.95	0.35	0.75	0.75	Day B
17	D10	0.039	0.244024	-0.585146	332_SSC	Patient	17	161	180	Peptid 17 - alternative	0.62	10.518	2.81369	0	0.55	0.45	0.7	0.8	0.8	Day B
17	D11	0.039	0.244024	-0.585146	332_SSC	Patient	28	271	290	Peptid 28 - standard	1.21	5.406	-0.970632	0.65	0.35	0	0.35	0.95	0.95	Day B
17	D12	0.039	0.244024	-0.585146	332_SSC	Patient	34	331	350	Peptid 34 - standard	-0.485	12.199	2.86142	0	0	1	0	0.45	0.45	Day B
17	E01	0.045	0.572709	-0.357895	66/16_NK	NHS	3	21	40	Peptid 3 - standard	-1.26	3.226	-5.18152	1	0	0	0	0.45	0.45	Day B
17	E02	0.041	0.353586	-0.509715	66/16_NK	NHS	9	81	100	Peptid 9 - standard	0.2	7.552	0.0786615	0	0.55	0.45	0.65	0.9	0.9	Day B
17	E03	0.04	0.298805	-0.547094	66/16_NK	NHS	15	141	160	Peptid 15 - standard	0.75	7.353	0.0262035	0	0.35	0.65	0.65	0.95	0.95	Day B
17	E04	0.041	0.353586	-0.509715	66/16_NK	NHS	23	221	240	Peptid 23 - alternative	1.925	7.352	0.0246369	0	0.65	0.35	0.95	1	1	Day B
17	E05	0.039	0.244024	-0.585146	66/16_NK	NHS	24	231	250	Peptid 24 - alternative	0.505	10.134	3.02459	0	0.15	0.85	0.45	0.8	0.8	Day B
17	E06	0.039	0.244024	-0.585146	66/16_NK	NHS	35	341	360	Peptid 35 - standard	-2.005	12.023	1.91229	0	0	1	0	0	0	Day B
17	E07	0.04	0.298805	-0.547094	332_SSC	Patient	3	21	40	Peptid 3 - standard	-1.26	3.226	-5.18152	1	0	0	0	0.45	0.45	Day B
17	E08	0.039	0.244024	-0.585146	332_SSC	Patient	9	81	100	Peptid 9 - standard	0.2	7.552	0.0786615	0	0.55	0.45	0.65	0.9	0.9	Day B
17	E09	0.039	0.244024	-0.585146	332_SSC	Patient	15	141	160	Peptid 15 - standard	0.75	7.353	0.0262035	0	0.35	0.65	0.65	0.95	0.95	Day B
17	E10	0.04	0.298805	-0.547094	332_SSC	Patient	23	221	240	Peptid 23 - alternative	1.925	7.352	0.0246369	0	0.65	0.35	0.95	1	1	Day B
17	E11	0.04	0.298805	-0.547094	332_SSC	Patient	24	231	250	Peptid 24 - alternative	0.505	10.134	3.02459	0	0.15	0.85	0.45	0.8	0.8	Day B
17	E12	0.039	0.244024	-0.585146	332_SSC	Patient	35	341	360	Peptid 35 - standard	-2.005	12.023	1.91229	0	0	1	0	0	0	Day B
17	F01	0.044	0.517928	-0.396834	66/16_NK	NHS	4	31	50	Peptid 4 - standard	-0.955	3.295	-4.22766	1	0	0	0	0.7	0.7	Day B
17	F02	0.041	0.353586	-0.509715	66/16_NK	NHS	10	91	110	Peptid 10 - standard	1.82	5.292	-0.922889	0	1	0	0.95	1	1	Day B
17	F03	0.04	0.298805	-0.547094	66/16_NK	NHS	16	151	170	Peptid 16 - standard	-0.105	12.204	3.0739	0	0.05	0.95	0.35	0.75	0.75	Day B
17	F04	0.04	0.298805	-0.547094	66/16_NK	NHS	22	211	230	Peptid 22 - standard	1.5	12.5	1.90916	0.1	0.9	0	0.75	1	1	Day B
17	F05	0.039	0.244024	-0.585146	66/16_NK	NHS	26	251	270	Peptid 26 - alternative	1.85	10.526	1.86143	0	0.75	0.25	0.9	0.9	0.9	Day B
17	F06	0.039	0.244024	-0.585146	66/16_NK	NHS	NK	NA	NA	Negative Control	NA	6.1	-0.0908091	NA	NA	NA	NA	NA	NA	Day B
17	F07	0.038	0.189243	-0.624727	332_SSC	Patient	4	31	50	Peptid 4 - standard	-0.955	3.295	-4.22766	1	0	0	0	0.7	0.7	Day B
17	F08	0.038	0.189243	-0.624727	332_SSC	Patient	10	91	110	Peptid 10 - standard	1.82	5.292	-0.922889	0	1	0	0.95	1	1	Day B
17	F09	0.039	0.244024	-0.585146	332_SSC	Patient	16	151	170	Peptid 16 - standard	-0.105	12.204	3.0739	0	0.05	0.95	0.35	0.75	0.75	Day B
17	F10	0.041	0.353586	-0.509715	332_SSC	Patient	22	211	230	Peptid 22 - standard	1.5	12.5	1.90916	0.1	0.9	0	0.75	1	1	Day B
17	F11	0.039	0.244024	-0.585146	332_SSC	Patient	26	251	270	Peptid 26 - alternative	1.85	10.526	1.86143	0	0.75	0.25	0.9	0.9	0.9	Day B
17	F12	0.038	0.189243	-0.624727	332_SSC	Patient	NK	NA	NA	Negative Control	NA	6.1	-0.0908091	NA	NA	NA	NA	NA	NA	Day B
17	G01	0.044	0.517928	-0.396834	66/16_NK	NHS	5	41	60	Peptid 5 - standard	-0.055	4.109	-1.13697	0.65	0.35	0	0.3	0.85	0.85	Day B
17	G02	0.042	0.408367	-0.47246	66/16_NK	NHS	11	101	120	Peptid 11 - standard	1.625	3.75	-1.08923	0.5	0.5	0	0.45	1	1	Day B
17	G03	0.039	0.244024	-0.585146	66/16_NK	NHS	17	161	180	Peptid 17 - standard	0.62	10.518	2.81369	0	0.55	0.45	0.7	0.8	0.8	Day B
17	G04	0.039	0.244024	-0.585146	66/16_NK	NHS	23	221	240	Peptid 23 - standard	1.925	7.352	0.0246369	0	0.65	0.35	0.95	1	1	Day B
17	G05	0.038	0.189243	-0.624727	66/16_NK	NHS	29	281	300	Peptid 29 - standard	-0.36	8.545	0.864581	0.9	0.1	0	0.05	0.75	0.75	Day B
17	G06	0.039	0.244024	-0.585146	66/16_NK	NHS	31	301	320	Peptid 31 - alternative	0.845	7.249	-0.0230898	0	1	0	1	0.95	0.95	Day B
17	G07	0.041	0.353586	-0.509715	332_SSC	Patient	5	41	60	Peptid 5 - standard	-0.055	4.109	-1.13697	0.65	0.35	0	0.3	0.85	0.85	Day B
17	G08	0.039	0.244024	-0.585146	332_SSC	Patient	11	101	120	Peptid 11 - standard	1.625	3.75	-1.08923	0.5	0.5	0	0.45	1	1	Day B
17	G09	0.04	0.298805	-0.547094	332_SSC	Patient	17	161	180	Peptid 17 - standard	0.62	10.518	2.81369	0	0.55	0.45	0.7	0.8	0.8	Day B
17	G10	0.039	0.244024	-0.585146	332_SSC	Patient	23	221	240	Peptid 23 - standard	1.925	7.352	0.0246369	0	0.65	0.35	0.95	1	1	Day B
17	G11	0.039	0.244024	-0.585146	332_SSC	Patient	29	281	300	Peptid 29 - standard	-0.36	8.545	0.864581	0.9	0.1	0	0.05	0.75	0.75	Day B
17	G12	0.045	0.572709	-0.357895	332_SSC	Patient	31	301	320	Peptid 31 - alternative	0.845	7.249	-0.0230898	0	1	0	1	0.95	0.95	Day B
17	H01	0.043	0.463147	-0.434936	66/16_NK	NHS	6	51	70	Peptid 6 - standard	1.495	6.332	-0.090825	0.15	0.85	0	0.8	0.9	0.9	Day B
17	H02	0.043	0.463147	-0.434936	66/16_NK	NHS	12	111	130	Peptid 12 - standard	1.155	6.161	-0.138536	0.75	0.25	0	0	1	1	Day B
17	H03	0.042	0.408367	-0.47246	66/16_NK	NHS	18	171	190	Peptid 18 - standard	2.07	3.75	-1.18468	0.05	0.95	0	0.9	1	1	Day B
17	H04	0.042	0.408367	-0.47246	66/16_NK	NHS	24	231	250	Peptid 24 - standard	0.505	10.134	3.02459	0	0.15	0.85	0.45	0.8	0.8	Day B
17	H05	0.042	0.408367	-0.47246	66/16_NK	NHS	30	291	310	Peptid 30 - standard	-0.43	9.299	1.0755	0.4	0.6	0	0.55	0.75	0.75	Day B
17	H06	0.042	0.408367	-0.47246	66/16_NK	NHS	36	351	370	Peptid 36 - standard	-1.26667	4.426	-1.08768	0	0	1	0	0	0	Day B
17	H07	0.042	0.408367	-0.47246	332_SSC	Patient	6	51	70	Peptid 6 - standard	1.495	6.332	-0.090825	0.15	0.85	0	0.8	0.9	0.9	Day B
17	H08	0.045	0.572709	-0.357895	332_SSC	Patient	12	111	130	Peptid 12 - standard	1.155	6.161	-0.138536	0.75	0.25	0	0	1	1	Day B
17	H09	0.041	0.353586	-0.509715	332_SSC	Patient	18	171	190	Peptid 18 - standard	2.07	3.75	-1.18468	0.05	0.95	0	0.9	1	1	Day B
17	H10	0.04	0.298805	-0.547094	332_SSC	Patient	24	231	250	Peptid 24 - standard	0.505	10.134	3.02459	0	0.15	0.85	0.45	0.8	0.8	Day B
17	H11	0.041	0.353586	-0.509715	332_SSC	Patient	30	291	310	Peptid 30 - standard	-0.43	9.299	1.0755	0.4	0.6	0	0.55	0.75	0.75	Day B
17	H12	0.043	0.463147	-0.434936	332_SSC	Patient	36	351	370	Peptid 36 - standard	-1.26667	4.426	-1.08768	0	0	1	0	0	0	Day B
18	A01	0.042	0.00867983	-0.825989	70/16_NK	NHS	7	61	80	Peptid 7 - alternative	2.035	6.1	-0.0908091	0	1	0	0.95	0.95	0.95	Day B
18	A02	0.043	0.0105159	-0.819978	70/16_NK	NHS	7	61	80	Peptid 7 - standard	2.035	6.1	-0.0908091	0	1	0	0.95	0.95	0.95	Day B
18	A03	0.211	0.318984	-0.533281	70/16_NK	NHS	13	121	140	Peptid 13 - standard	1.06	8.523	0.858299	0.25	0.75	0	0.5	0.75	0.75	Day B
18	A04	0.047	0.0178604	-0.801002	70/16_NK	NHS	19	181	200	Peptid 19 - standard	0.31	5.361	-1.7534	0.55	0.45	0	0.4	0.7	0.7	Day B
18	A05	0.063	0.0472383	-0.753242	70/16_NK	NHS	25	241	260	Peptid 25 - standard	0.845	13.102	4.90911	0	0.25	0.75	0.4	0.7	0.7	Day B
18	A06	0.042	0.00867983	-0.825989	70/16_NK	NHS	31	301	320	Peptid 31 - standard	0.845	7.249	-0.0230898	0	1	0	1	0.95	0.95	Day B
18	A07	0.041	0.00684371	-0.8329	368_SSC	Patient	7	61	80	Peptid 7 - alternative	2.035	6.1	-0.0908091	0	1	0	0.95	0.95	0.95	Day B
18	A08	0.059	0.0398938	-0.763119	368_SSC	Patient	7	61	80	Peptid 7 - standard	2.035	6.1	-0.0908091	0	1	0	0.95	0.95	0.95	Day B
18	A09	0.272	0.430987	-0.457017	368_SSC	Patient	13	121	140	Peptid 13 - standard	1.06	8.523	0.858299	0.25	0.75	0	0.5	0.75	0.75	Day B
18	A10	0.045	0.0141882	-0.809718	368_SSC	Patient	19	181	200	Peptid 19 - standard	0.31	5.361	-1.7534	0.55	0.45	0	0.4	0.7	0.7	Day B
18	A11	0.057	0.0362216	-0.768417	368_SSC	Patient	25	241	260	Peptid 25 - standard	0.845	13.102	4.90911	0	0.25	0.75	0.4	0.7	0.7	Day B
18	A12	0.043	0.0105159	-0.819978	368_SSC	Patient	31	301	320	Peptid 31 - standard	0.845	7.249	-0.0230898	0	1	0	1	0.95	0.95	Day B
18	B01	0.07	0.0600911	-0.737663	70/16_NK	NHS	NA	NA	NA	Positive Control	NA	6.1	-0.0908091	NA	NA	NA	NA	NA	NA	Day B
18	B02	0.046	0.0160243	-0.805207	70/16_NK	NHS	11	101	120	Peptid 11 - standard	1.625	3.75	-1.08923	0.5	0.5	0	0.45	1	1	Day B
18	B03	0.146	0.199636	-0.617043	70/16_NK	NHS	14	131	150	Peptid 14 - standard	0.895	6.155	-0.140134	0	0.85	0.15	1	0.75	0.75	Day B
18	B04	0.448	0.754144	-0.220074	70/16_NK	NHS	20	191	210	Peptid 20 - standard	-1.13	6.782	-0.637957	1	0	0	0	0.7	0.7	Day B
18	B05	0.048	0.0196965	-0.79705	70/16_NK	NHS	26	251	270	Peptid 26 - standard	1.85	10.526	1.86143	0	0.75	0.25	0.9	0.9	0.9	Day B
18	B06	0.047	0.0178604	-0.801002	70/16_NK	NHS	32	311	330	Peptid 32 - standard	0.5	8.798	1.81212	0	0.55	0.45	0.8	0.7	0.7	Day B
18	B07	0.075	0.0692717	-0.7275	368_SSC	Patient	NA	NA	NA	Positive Control	NA	6.1	-0.0908091	NA	NA	NA	NA	NA	NA	Day B
18	B08	0.043	0.0105159	-0.819978	368_SSC	Patient	11	101	120	Peptid 11 - standard	1.625	3.75	-1.08923	0.5	0.5	0	0.45	1	1	Day B
18	B09	0.101	0.117011	-0.682084	368_SSC	Patient	14	131	150	Peptid 14 - standard	0.895	6.155	-0.140134	0	0.85	0.15	1	0.75	0.75	Day B
18	B10	0.509	0.866147	-0.125645	368_SSC	Patient	20	191	210	Peptid 20 - standard	-1.13	6.782	-0.637957	1	0	0	0	0.7	0.7	Day B
18	B11	0.05	0.0233688	-0.789755	368_SSC	Patient	26	251	270	Peptid 26 - standard	1.85	10.526	1.86143	0	0.75	0.25	0.9	0.9	0.9	Day B
18	B12	0.054	0.0307132	-0.776938	368_SSC	Patient	32	311	330	Peptid 32 - standard	0.5	8.798	1.81212	0	0.55	0.45	0.8	0.7	0.7	Day B
18	C01	0.047	0.0178604	-0.801002	70/16_NK	NHS	1	1	20	Peptid 1 - standard	0.715	3.737	-3.91814	1	0	0	0	0.85	0.85	Day B
18	C02	0.05	0.0233688	-0.789755	70/16_NK	NHS	12	111	130	Peptid 12 - alternative	1.155	6.161	-0.138536	0.75	0.25	0	0	1	1	Day B
18	C03	0.05	0.0233688	-0.789755	70/16_NK	NHS	15	141	160	Peptid 15 - alternative	0.75	7.353	0.0262035	0	0.35	0.65	0.65	0.95	0.95	Day B
18	C04	0.069	0.058255	-0.739782	70/16_NK	NHS	21	201	220	Peptid 21 - standard	-0.2	9.501	2.02619	0.6	0.4	0	0.25	1	1	Day B
18	C05	0.057	0.0362216	-0.768417	70/16_NK	NHS	27	261	280	Peptid 27 - standard	1.92	5.29	-0.972198	0.15	0.85	0	0.85	1	1	Day B
18	C06	0.048	0.0196965	-0.79705	70/16_NK	NHS	33	321	340	Peptid 33 - standard	0.25	11.38	2.86142	0	0.05	0.95	0.3	0.65	0.65	Day B
18	C07	0.049	0.0215327	-0.793311	368_SSC	Patient	1	1	20	Peptid 1 - standard	0.715	3.737	-3.91814	1	0	0	0	0.85	0.85	Day B
18	C08	0.044	0.0123521	-0.814606	368_SSC	Patient	12	111	130	Peptid 12 - alternative	1.155	6.161	-0.138536	0.75	0.25	0	0	1	1	Day B
18	C09	0.045	0.0141882	-0.809718	368_SSC	Patient	15	141	160	Peptid 15 - alternative	0.75	7.353	0.0262035	0	0.35	0.65	0.65	0.95	0.95	Day B
18	C10	0.063	0.0472383	-0.753242	368_SSC	Patient	21	201	220	Peptid 21 - standard	-0.2	9.501	2.02619	0.6	0.4	0	0.25	1	1	Day B
18	C11	0.067	0.0545828	-0.744117	368_SSC	Patient	27	261	280	Peptid 27 - standard	1.92	5.29	-0.972198	0.15	0.85	0	0.85	1	1	Day B
18	C12	0.053	0.0288771	-0.779964	368_SSC	Patient	33	321	340	Peptid 33 - standard	0.25	11.38	2.86142	0	0.05	0.95	0.3	0.65	0.65	Day B
18	D01	0.065	0.0509105	-0.748597	70/16_NK	NHS	2	11	30	Peptid 2 - standard	-0.13	3.295	-4.08764	1	0	0	0	0.65	0.65	Day B
18	D02	0.043	0.0105159	-0.819978	70/16_NK	NHS	8	71	90	Peptid 8 - standard	0.305	10.398	0.910742	0	0.55	0.45	0.6	0.9	0.9	Day B
18	D03	0.044	0.0123521	-0.814606	70/16_NK	NHS	16	151	170	Peptid 16 - alternative	-0.105	12.204	3.0739	0	0.05	0.95	0.35	0.75	0.75	Day B
18	D04	0.075	0.0692717	-0.7275	70/16_NK	NHS	17	161	180	Peptid 17 - alternative	0.62	10.518	2.81369	0	0.55	0.45	0.7	0.8	0.8	Day B
18	D05	0.15	0.206981	-0.61167	70/16_NK	NHS	28	271	290	Peptid 28 - standard	1.21	5.406	-0.970632	0.65	0.35	0	0.35	0.95	0.95	Day B
18	D06	0.047	0.0178604	-0.801002	70/16_NK	NHS	34	331	350	Peptid 34 - standard	-0.485	12.199	2.86142	0	0	1	0	0.45	0.45	Day B
18	D07	0.056	0.0343855	-0.771173	368_SSC	Patient	2	11	30	Peptid 2 - standard	-0.13	3.295	-4.08764	1	0	0	0	0.65	0.65	Day B
18	D08	0.046	0.0160243	-0.805207	368_SSC	Patient	8	71	90	Peptid 8 - standard	0.305	10.398	0.910742	0	0.55	0.45	0.6	0.9	0.9	Day B
18	D09	0.052	0.027041	-0.783099	368_SSC	Patient	16	151	170	Peptid 16 - alternative	-0.105	12.204	3.0739	0	0.05	0.95	0.35	0.75	0.75	Day B
18	D10	0.08	0.0784523	-0.717934	368_SSC	Patient	17	161	180	Peptid 17 - alternative	0.62	10.518	2.81369	0	0.55	0.45	0.7	0.8	0.8	Day B
18	D11	0.112	0.137208	-0.665133	368_SSC	Patient	28	271	290	Peptid 28 - standard	1.21	5.406	-0.970632	0.65	0.35	0	0.35	0.95	0.95	Day B
18	D12	0.046	0.0160243	-0.805207	368_SSC	Patient	34	331	350	Peptid 34 - standard	-0.485	12.199	2.86142	0	0	1	0	0.45	0.45	Day B
18	E01	0.211	0.318984	-0.533281	70/16_NK	NHS	3	21	40	Peptid 3 - standard	-1.26	3.226	-5.18152	1	0	0	0	0.45	0.45	Day B
18	E02	0.043	0.0105159	-0.819978	70/16_NK	NHS	9	81	100	Peptid 9 - standard	0.2	7.552	0.0786615	0	0.55	0.45	0.65	0.9	0.9	Day B
18	E03	0.043	0.0105159	-0.819978	70/16_NK	NHS	15	141	160	Peptid 15 - standard	0.75	7.353	0.0262035	0	0.35	0.65	0.65	0.95	0.95	Day B
18	E04	0.127	0.16475	-0.643281	70/16_NK	NHS	23	221	240	Peptid 23 - alternative	1.925	7.352	0.0246369	0	0.65	0.35	0.95	1	1	Day B
18	E05	0.042	0.00867983	-0.825989	70/16_NK	NHS	24	231	250	Peptid 24 - alternative	0.505	10.134	3.02459	0	0.15	0.85	0.45	0.8	0.8	Day B
18	E06	0.047	0.0178604	-0.801002	70/16_NK	NHS	35	341	360	Peptid 35 - standard	-2.005	12.023	1.91229	0	0	1	0	0	0	Day B
18	E07	0.11	0.133536	-0.668147	368_SSC	Patient	3	21	40	Peptid 3 - standard	-1.26	3.226	-5.18152	1	0	0	0	0.45	0.45	Day B
18	E08	0.06	0.04173	-0.760567	368_SSC	Patient	9	81	100	Peptid 9 - standard	0.2	7.552	0.0786615	0	0.55	0.45	0.65	0.9	0.9	Day B
18	E09	0.053	0.0288771	-0.779964	368_SSC	Patient	15	141	160	Peptid 15 - standard	0.75	7.353	0.0262035	0	0.35	0.65	0.65	0.95	0.95	Day B
18	E10	0.115	0.142716	-0.66066	368_SSC	Patient	23	221	240	Peptid 23 - alternative	1.925	7.352	0.0246369	0	0.65	0.35	0.95	1	1	Day B
18	E11	0.061	0.0435661	-0.758073	368_SSC	Patient	24	231	250	Peptid 24 - alternative	0.505	10.134	3.02459	0	0.15	0.85	0.45	0.8	0.8	Day B
18	E12	0.05	0.0233688	-0.789755	368_SSC	Patient	35	341	360	Peptid 35 - standard	-2.005	12.023	1.91229	0	0	1	0	0	0	Day B
18	F01	0.437	0.733946	-0.236244	70/16_NK	NHS	4	31	50	Peptid 4 - standard	-0.955	3.295	-4.22766	1	0	0	0	0.7	0.7	Day B
18	F02	0.051	0.0252049	-0.786358	70/16_NK	NHS	10	91	110	Peptid 10 - standard	1.82	5.292	-0.922889	0	1	0	0.95	1	1	Day B
18	F03	0.077	0.072944	-0.723609	70/16_NK	NHS	16	151	170	Peptid 16 - standard	-0.105	12.204	3.0739	0	0.05	0.95	0.35	0.75	0.75	Day B
18	F04	0.066	0.0527467	-0.746338	70/16_NK	NHS	22	211	230	Peptid 22 - standard	1.5	12.5	1.90916	0.1	0.9	0	0.75	1	1	Day B
18	F05	0.045	0.0141882	-0.809718	70/16_NK	NHS	26	251	270	Peptid 26 - alternative	1.85	10.526	1.86143	0	0.75	0.25	0.9	0.9	0.9	Day B
18	F06	0.052	0.027041	-0.783099	70/16_NK	NHS	NK	NA	NA	Negative Control	NA	6.1	-0.0908091	NA	NA	NA	NA	NA	NA	Day B
18	F07	0.529	0.902869	-0.0927051	368_SSC	Patient	4	31	50	Peptid 4 - standard	-0.955	3.295	-4.22766	1	0	0	0	0.7	0.7	Day B
18	F08	0.053	0.0288771	-0.779964	368_SSC	Patient	10	91	110	Peptid 10 - standard	1.82	5.292	-0.922889	0	1	0	0.95	1	1	Day B
18	F09	0.097	0.109666	-0.688504	368_SSC	Patient	16	151	170	Peptid 16 - standard	-0.105	12.204	3.0739	0	0.05	0.95	0.35	0.75	0.75	Day B
18	F10	0.049	0.0215327	-0.793311	368_SSC	Patient	22	211	230	Peptid 22 - standard	1.5	12.5	1.90916	0.1	0.9	0	0.75	1	1	Day B
18	F11	0.068	0.0564189	-0.741932	368_SSC	Patient	26	251	270	Peptid 26 - alternative	1.85	10.526	1.86143	0	0.75	0.25	0.9	0.9	0.9	Day B
18	F12	0.043	0.0105159	-0.819978	368_SSC	Patient	NK	NA	NA	Negative Control	NA	6.1	-0.0908091	NA	NA	NA	NA	NA	NA	Day B
18	G01	0.082	0.0821246	-0.714246	70/16_NK	NHS	5	41	60	Peptid 5 - standard	-0.055	4.109	-1.13697	0.65	0.35	0	0.3	0.85	0.85	Day B
18	G02	0.056	0.0343855	-0.771173	70/16_NK	NHS	11	101	120	Peptid 11 - standard	1.625	3.75	-1.08923	0.5	0.5	0	0.45	1	1	Day B
18	G03	0.044	0.0123521	-0.814606	70/16_NK	NHS	17	161	180	Peptid 17 - standard	0.62	10.518	2.81369	0	0.55	0.45	0.7	0.8	0.8	Day B
18	G04	0.046	0.0160243	-0.805207	70/16_NK	NHS	23	221	240	Peptid 23 - standard	1.925	7.352	0.0246369	0	0.65	0.35	0.95	1	1	Day B
18	G05	0.048	0.0196965	-0.79705	70/16_NK	NHS	29	281	300	Peptid 29 - standard	-0.36	8.545	0.864581	0.9	0.1	0	0.05	0.75	0.75	Day B
18	G06	0.14	0.188619	-0.625191	70/16_NK	NHS	31	301	320	Peptid 31 - alternative	0.845	7.249	-0.0230898	0	1	0	1	0.95	0.95	Day B
18	G07	0.088	0.0931413	-0.703584	368_SSC	Patient	5	41	60	Peptid 5 - standard	-0.055	4.109	-1.13697	0.65	0.35	0	0.3	0.85	0.85	Day B
18	G08	0.051	0.0252049	-0.786358	368_SSC	Patient	11	101	120	Peptid 11 - standard	1.625	3.75	-1.08923	0.5	0.5	0	0.45	1	1	Day B
18	G09	0.044	0.0123521	-0.814606	368_SSC	Patient	17	161	180	Peptid 17 - standard	0.62	10.518	2.81369	0	0.55	0.45	0.7	0.8	0.8	Day B
18	G10	0.044	0.0123521	-0.814606	368_SSC	Patient	23	221	240	Peptid 23 - standard	1.925	7.352	0.0246369	0	0.65	0.35	0.95	1	1	Day B
18	G11	0.049	0.0215327	-0.793311	368_SSC	Patient	29	281	300	Peptid 29 - standard	-0.36	8.545	0.864581	0.9	0.1	0	0.05	0.75	0.75	Day B
18	G12	0.146	0.199636	-0.617043	368_SSC	Patient	31	301	320	Peptid 31 - alternative	0.845	7.249	-0.0230898	0	1	0	1	0.95	0.95	Day B
18	H01	0.122	0.155569	-0.650431	70/16_NK	NHS	6	51	70	Peptid 6 - standard	1.495	6.332	-0.090825	0.15	0.85	0	0.8	0.9	0.9	Day B
18	H02	0.084	0.0857968	-0.710629	70/16_NK	NHS	12	111	130	Peptid 12 - standard	1.155	6.161	-0.138536	0.75	0.25	0	0	1	1	Day B
18	H03	0.075	0.0692717	-0.7275	70/16_NK	NHS	18	171	190	Peptid 18 - standard	2.07	3.75	-1.18468	0.05	0.95	0	0.9	1	1	Day B
18	H04	0.047	0.0178604	-0.801002	70/16_NK	NHS	24	231	250	Peptid 24 - standard	0.505	10.134	3.02459	0	0.15	0.85	0.45	0.8	0.8	Day B
18	H05	0.046	0.0160243	-0.805207	70/16_NK	NHS	30	291	310	Peptid 30 - standard	-0.43	9.299	1.0755	0.4	0.6	0	0.55	0.75	0.75	Day B
18	H06	0.044	0.0123521	-0.814606	70/16_NK	NHS	36	351	370	Peptid 36 - standard	-1.26667	4.426	-1.08768	0	0	1	0	0	0	Day B
18	H07	0.109	0.1317	-0.669665	368_SSC	Patient	6	51	70	Peptid 6 - standard	1.495	6.332	-0.090825	0.15	0.85	0	0.8	0.9	0.9	Day B
18	H08	0.098	0.111502	-0.686884	368_SSC	Patient	12	111	130	Peptid 12 - standard	1.155	6.161	-0.138536	0.75	0.25	0	0	1	1	Day B
18	H09	0.079	0.0766162	-0.719805	368_SSC	Patient	18	171	190	Peptid 18 - standard	2.07	3.75	-1.18468	0.05	0.95	0	0.9	1	1	Day B
18	H10	0.046	0.0160243	-0.805207	368_SSC	Patient	24	231	250	Peptid 24 - standard	0.505	10.134	3.02459	0	0.15	0.85	0.45	0.8	0.8	Day B
18	H11	0.047	0.0178604	-0.801002	368_SSC	Patient	30	291	310	Peptid 30 - standard	-0.43	9.299	1.0755	0.4	0.6	0	0.55	0.75	0.75	Day B
18	H12	0.045	0.0141882	-0.809718	368_SSC	Patient	36	351	370	Peptid 36 - standard	-1.26667	4.426	-1.08768	0	0	1	0	0	0	Day B
19	A01	0.325	0.294714	-0.549904	88_SSC	Patient	7	61	80	Peptid 7 - alternative	2.035	6.1	-0.0908091	0	1	0	0.95	0.95	0.95	Day A
19	A02	0.332	0.303958	-0.543559	88_SSC	Patient	7	61	80	Peptid 7 - standard	2.035	6.1	-0.0908091	0	1	0	0.95	0.95	0.95	Day A
19	A03	0.357	0.336971	-0.521018	88_SSC	Patient	13	121	140	Peptid 13 - standard	1.06	8.523	0.858299	0.25	0.75	0	0.5	0.75	0.75	Day A
19	A04	0.351	0.329048	-0.526415	88_SSC	Patient	19	181	200	Peptid 19 - standard	0.31	5.361	-1.7534	0.55	0.45	0	0.4	0.7	0.7	Day A
19	A05	0.585	0.638048	-0.310032	88_SSC	Patient	25	241	260	Peptid 25 - standard	0.845	13.102	4.90911	0	0.25	0.75	0.4	0.7	0.7	Day A
19	A06	0.312	0.277548	-0.561742	88_SSC	Patient	31	301	320	Peptid 31 - standard	0.845	7.249	-0.0230898	0	1	0	1	0.95	0.95	Day A
19	A07	0.136	0.0451375	-0.755981	373_SSC	Patient	7	61	80	Peptid 7 - alternative	2.035	6.1	-0.0908091	0	1	0	0.95	0.95	0.95	Day A
19	A08	0.151	0.0649452	-0.732206	373_SSC	Patient	7	61	80	Peptid 7 - standard	2.035	6.1	-0.0908091	0	1	0	0.95	0.95	0.95	Day A
19	A09	0.155	0.0702272	-0.726478	373_SSC	Patient	13	121	140	Peptid 13 - standard	1.06	8.523	0.858299	0.25	0.75	0	0.5	0.75	0.75	Day A
19	A10	0.135	0.043817	-0.757736	373_SSC	Patient	19	181	200	Peptid 19 - standard	0.31	5.361	-1.7534	0.55	0.45	0	0.4	0.7	0.7	Day A
19	A11	0.541	0.579945	-0.352676	373_SSC	Patient	25	241	260	Peptid 25 - standard	0.845	13.102	4.90911	0	0.25	0.75	0.4	0.7	0.7	Day A
19	A12	0.145	0.0570221	-0.741222	373_SSC	Patient	31	301	320	Peptid 31 - standard	0.845	7.249	-0.0230898	0	1	0	1	0.95	0.95	Day A
19	B01	0.707	0.79915	-0.183144	88_SSC	Patient	NA	NA	NA	Positive Control	NA	6.1	-0.0908091	NA	NA	NA	NA	NA	NA	Day A
19	B02	0.344	0.319804	-0.53272	88_SSC	Patient	11	101	120	Peptid 11 - standard	1.625	3.75	-1.08923	0.5	0.5	0	0.45	1	1	Day A
19	B03	0.341	0.315843	-0.535426	88_SSC	Patient	14	131	150	Peptid 14 - standard	0.895	6.155	-0.140134	0	0.85	0.15	1	0.75	0.75	Day A
19	B04	0.465	0.479586	-0.423575	88_SSC	Patient	20	191	210	Peptid 20 - standard	-1.13	6.782	-0.637957	1	0	0	0	0.7	0.7	Day A
19	B05	0.405	0.400355	-0.477917	88_SSC	Patient	26	251	270	Peptid 26 - standard	1.85	10.526	1.86143	0	0.75	0.25	0.9	0.9	0.9	Day A
19	B06	0.386	0.375266	-0.49498	88_SSC	Patient	32	311	330	Peptid 32 - standard	0.5	8.798	1.81212	0	0.55	0.45	0.8	0.7	0.7	Day A
19	B07	0.679	0.762176	-0.213576	373_SSC	Patient	NA	NA	NA	Positive Control	NA	6.1	-0.0908091	NA	NA	NA	NA	NA	NA	Day A
19	B08	0.114	0.0160862	-0.80506	373_SSC	Patient	11	101	120	Peptid 11 - standard	1.625	3.75	-1.08923	0.5	0.5	0	0.45	1	1	Day A
19	B09	0.143	0.0543811	-0.744359	373_SSC	Patient	14	131	150	Peptid 14 - standard	0.895	6.155	-0.140134	0	0.85	0.15	1	0.75	0.75	Day A
19	B10	0.139	0.049099	-0.750867	373_SSC	Patient	20	191	210	Peptid 20 - standard	-1.13	6.782	-0.637957	1	0	0	0	0.7	0.7	Day A
19	B11	0.179	0.10192	-0.695454	373_SSC	Patient	26	251	270	Peptid 26 - standard	1.85	10.526	1.86143	0	0.75	0.25	0.9	0.9	0.9	Day A
19	B12	0.235	0.175868	-0.634773	373_SSC	Patient	32	311	330	Peptid 32 - standard	0.5	8.798	1.81212	0	0.55	0.45	0.8	0.7	0.7	Day A
19	C01	0.345	0.321125	-0.531819	88_SSC	Patient	1	1	20	Peptid 1 - standard	0.715	3.737	-3.91814	1	0	0	0	0.85	0.85	Day A
19	C02	0.379	0.366022	-0.501262	88_SSC	Patient	12	111	130	Peptid 12 - alternative	1.155	6.161	-0.138536	0.75	0.25	0	0	1	1	Day A
19	C03	0.671	0.751612	-0.222114	88_SSC	Patient	15	141	160	Peptid 15 - alternative	0.75	7.353	0.0262035	0	0.35	0.65	0.65	0.95	0.95	Day A
19	C04	0.43	0.433368	-0.455387	88_SSC	Patient	21	201	220	Peptid 21 - standard	-0.2	9.501	2.02619	0.6	0.4	0	0.25	1	1	Day A
19	C05	0.399	0.392432	-0.483309	88_SSC	Patient	27	261	280	Peptid 27 - standard	1.92	5.29	-0.972198	0.15	0.85	0	0.85	1	1	Day A
19	C06	0.599	0.656535	-0.296161	88_SSC	Patient	33	321	340	Peptid 33 - standard	0.25	11.38	2.86142	0	0.05	0.95	0.3	0.65	0.65	Day A
19	C07	0.144	0.0557016	-0.742782	373_SSC	Patient	1	1	20	Peptid 1 - standard	0.715	3.737	-3.91814	1	0	0	0	0.85	0.85	Day A
19	C08	0.133	0.041176	-0.761331	373_SSC	Patient	12	111	130	Peptid 12 - alternative	1.155	6.161	-0.138536	0.75	0.25	0	0	1	1	Day A
19	C09	0.188	0.113804	-0.684868	373_SSC	Patient	15	141	160	Peptid 15 - alternative	0.75	7.353	0.0262035	0	0.35	0.65	0.65	0.95	0.95	Day A
19	C10	0.253	0.199637	-0.617042	373_SSC	Patient	21	201	220	Peptid 21 - standard	-0.2	9.501	2.02619	0.6	0.4	0	0.25	1	1	Day A
19	C11	0.158	0.0741888	-0.72231	373_SSC	Patient	27	261	280	Peptid 27 - standard	1.92	5.29	-0.972198	0.15	0.85	0	0.85	1	1	Day A
19	C12	0.354	0.333009	-0.523715	373_SSC	Patient	33	321	340	Peptid 33 - standard	0.25	11.38	2.86142	0	0.05	0.95	0.3	0.65	0.65	Day A
19	D01	0.405	0.400355	-0.477917	88_SSC	Patient	2	11	30	Peptid 2 - standard	-0.13	3.295	-4.08764	1	0	0	0	0.65	0.65	Day A
19	D02	0.472	0.48883	-0.417162	88_SSC	Patient	8	71	90	Peptid 8 - standard	0.305	10.398	0.910742	0	0.55	0.45	0.6	0.9	0.9	Day A
19	D03	0.733	0.833483	-0.154078	88_SSC	Patient	16	151	170	Peptid 16 - alternative	-0.105	12.204	3.0739	0	0.05	0.95	0.35	0.75	0.75	Day A
19	D04	0.396	0.388471	-0.486003	88_SSC	Patient	17	161	180	Peptid 17 - alternative	0.62	10.518	2.81369	0	0.55	0.45	0.7	0.8	0.8	Day A
19	D05	0.333	0.305278	-0.542655	88_SSC	Patient	28	271	290	Peptid 28 - standard	1.21	5.406	-0.970632	0.65	0.35	0	0.35	0.95	0.95	Day A
19	D06	0.748	0.853291	-0.13693	88_SSC	Patient	34	331	350	Peptid 34 - standard	-0.485	12.199	2.86142	0	0	1	0	0.45	0.45	Day A
19	D07	0.157	0.0728683	-0.723688	373_SSC	Patient	2	11	30	Peptid 2 - standard	-0.13	3.295	-4.08764	1	0	0	0	0.65	0.65	Day A
19	D08	0.143	0.0543811	-0.744359	373_SSC	Patient	8	71	90	Peptid 8 - standard	0.305	10.398	0.910742	0	0.55	0.45	0.6	0.9	0.9	Day A
19	D09	0.249	0.194355	-0.620935	373_SSC	Patient	16	151	170	Peptid 16 - alternative	-0.105	12.204	3.0739	0	0.05	0.95	0.35	0.75	0.75	Day A
19	D10	0.187	0.112484	-0.686023	373_SSC	Patient	17	161	180	Peptid 17 - alternative	0.62	10.518	2.81369	0	0.55	0.45	0.7	0.8	0.8	Day A
19	D11	0.127	0.0332529	-0.772914	373_SSC	Patient	28	271	290	Peptid 28 - standard	1.21	5.406	-0.970632	0.65	0.35	0	0.35	0.95	0.95	Day A
19	D12	0.648	0.72124	-0.246298	373_SSC	Patient	34	331	350	Peptid 34 - standard	-0.485	12.199	2.86142	0	0	1	0	0.45	0.45	Day A
19	E01	0.361	0.342253	-0.517422	88_SSC	Patient	3	21	40	Peptid 3 - standard	-1.26	3.226	-5.18152	1	0	0	0	0.45	0.45	Day A
19	E02	0.47	0.486189	-0.418996	88_SSC	Patient	9	81	100	Peptid 9 - standard	0.2	7.552	0.0786615	0	0.55	0.45	0.65	0.9	0.9	Day A
19	E03	0.743	0.846689	-0.142678	88_SSC	Patient	15	141	160	Peptid 15 - standard	0.75	7.353	0.0262035	0	0.35	0.65	0.65	0.95	0.95	Day A
19	E04	0.286	0.243214	-0.585718	88_SSC	Patient	23	221	240	Peptid 23 - alternative	1.925	7.352	0.0246369	0	0.65	0.35	0.95	1	1	Day A
19	E05	0.372	0.356778	-0.507545	88_SSC	Patient	24	231	250	Peptid 24 - alternative	0.505	10.134	3.02459	0	0.15	0.85	0.45	0.8	0.8	Day A
19	E06	0.781	0.896868	-0.098162	88_SSC	Patient	35	341	360	Peptid 35 - standard	-2.005	12.023	1.91229	0	0	1	0	0	0	Day A
19	E07	0.171	0.0913554	-0.705275	373_SSC	Patient	3	21	40	Peptid 3 - standard	-1.26	3.226	-5.18152	1	0	0	0	0.45	0.45	Day A
19	E08	0.194	0.121727	-0.67804	373_SSC	Patient	9	81	100	Peptid 9 - standard	0.2	7.552	0.0786615	0	0.55	0.45	0.65	0.9	0.9	Day A
19	E09	0.184	0.108522	-0.689518	373_SSC	Patient	15	141	160	Peptid 15 - standard	0.75	7.353	0.0262035	0	0.35	0.65	0.65	0.95	0.95	Day A
19	E10	0.14	0.0504196	-0.749209	373_SSC	Patient	23	221	240	Peptid 23 - alternative	1.925	7.352	0.0246369	0	0.65	0.35	0.95	1	1	Day A
19	E11	0.135	0.043817	-0.757736	373_SSC	Patient	24	231	250	Peptid 24 - alternative	0.505	10.134	3.02459	0	0.15	0.85	0.45	0.8	0.8	Day A
19	E12	0.141	0.0517401	-0.747572	373_SSC	Patient	35	341	360	Peptid 35 - standard	-2.005	12.023	1.91229	0	0	1	0	0	0	Day A
19	F01	0.381	0.368663	-0.499467	88_SSC	Patient	4	31	50	Peptid 4 - standard	-0.955	3.295	-4.22766	1	0	0	0	0.7	0.7	Day A
19	F02	0.349	0.326407	-0.528215	88_SSC	Patient	10	91	110	Peptid 10 - standard	1.82	5.292	-0.922889	0	1	0	0.95	1	1	Day A
19	F03	0.697	0.785945	-0.194113	88_SSC	Patient	16	151	170	Peptid 16 - standard	-0.105	12.204	3.0739	0	0.05	0.95	0.35	0.75	0.75	Day A
19	F04	0.398	0.391112	-0.484207	88_SSC	Patient	22	211	230	Peptid 22 - standard	1.5	12.5	1.90916	0.1	0.9	0	0.75	1	1	Day A
19	F05	0.349	0.326407	-0.528215	88_SSC	Patient	26	251	270	Peptid 26 - alternative	1.85	10.526	1.86143	0	0.75	0.25	0.9	0.9	0.9	Day A
19	F06	0.382	0.369984	-0.49857	88_SSC	Patient	NK	NA	NA	Negative Control	NA	6.1	-0.0908091	NA	NA	NA	NA	NA	NA	Day A
19	F07	0.115	0.0174068	-0.802015	373_SSC	Patient	4	31	50	Peptid 4 - standard	-0.955	3.295	-4.22766	1	0	0	0	0.7	0.7	Day A
19	F08	0.117	0.0200478	-0.796319	373_SSC	Patient	10	91	110	Peptid 10 - standard	1.82	5.292	-0.922889	0	1	0	0.95	1	1	Day A
19	F09	0.178	0.100599	-0.696658	373_SSC	Patient	16	151	170	Peptid 16 - standard	-0.105	12.204	3.0739	0	0.05	0.95	0.35	0.75	0.75	Day A
19	F10	0.146	0.0583426	-0.73968	373_SSC	Patient	22	211	230	Peptid 22 - standard	1.5	12.5	1.90916	0.1	0.9	0	0.75	1	1	Day A
19	F11	0.132	0.0398555	-0.763173	373_SSC	Patient	26	251	270	Peptid 26 - alternative	1.85	10.526	1.86143	0	0.75	0.25	0.9	0.9	0.9	Day A
19	F12	0.114	0.0160862	-0.80506	373_SSC	Patient	NK	NA	NA	Negative Control	NA	6.1	-0.0908091	NA	NA	NA	NA	NA	NA	Day A
19	G01	0.424	0.425445	-0.460806	88_SSC	Patient	5	41	60	Peptid 5 - standard	-0.055	4.109	-1.13697	0.65	0.35	0	0.3	0.85	0.85	Day A
19	G02	0.367	0.350176	-0.512033	88_SSC	Patient	11	101	120	Peptid 11 - standard	1.625	3.75	-1.08923	0.5	0.5	0	0.45	1	1	Day A
19	G03	0.451	0.461099	-0.436347	88_SSC	Patient	17	161	180	Peptid 17 - standard	0.62	10.518	2.81369	0	0.55	0.45	0.7	0.8	0.8	Day A
19	G04	0.483	0.503355	-0.407042	88_SSC	Patient	23	221	240	Peptid 23 - standard	1.925	7.352	0.0246369	0	0.65	0.35	0.95	1	1	Day A
19	G05	0.345	0.321125	-0.531819	88_SSC	Patient	29	281	300	Peptid 29 - standard	-0.36	8.545	0.864581	0.9	0.1	0	0.05	0.75	0.75	Day A
19	G06	0.456	0.467701	-0.431794	88_SSC	Patient	31	301	320	Peptid 31 - alternative	0.845	7.249	-0.0230898	0	1	0	1	0.95	0.95	Day A
19	G07	0.155	0.0702272	-0.726478	373_SSC	Patient	5	41	60	Peptid 5 - standard	-0.055	4.109	-1.13697	0.65	0.35	0	0.3	0.85	0.85	Day A
19	G08	0.126	0.0319324	-0.774984	373_SSC	Patient	11	101	120	Peptid 11 - standard	1.625	3.75	-1.08923	0.5	0.5	0	0.45	1	1	Day A
19	G09	0.473	0.49015	-0.416244	373_SSC	Patient	17	161	180	Peptid 17 - standard	0.62	10.518	2.81369	0	0.55	0.45	0.7	0.8	0.8	Day A
19	G10	0.24	0.182471	-0.629789	373_SSC	Patient	23	221	240	Peptid 23 - standard	1.925	7.352	0.0246369	0	0.65	0.35	0.95	1	1	Day A
19	G11	0.116	0.0187273	-0.799107	373_SSC	Patient	29	281	300	Peptid 29 - standard	-0.36	8.545	0.864581	0.9	0.1	0	0.05	0.75	0.75	Day A
19	G12	0.148	0.0609837	-0.736645	373_SSC	Patient	31	301	320	Peptid 31 - alternative	0.845	7.249	-0.0230898	0	1	0	1	0.95	0.95	Day A
19	H01	0.216	0.150779	-0.654212	88_SSC	Patient	6	51	70	Peptid 6 - standard	1.495	6.332	-0.090825	0.15	0.85	0	0.8	0.9	0.9	Day A
19	H02	0.308	0.272266	-0.565402	88_SSC	Patient	12	111	130	Peptid 12 - standard	1.155	6.161	-0.138536	0.75	0.25	0	0	1	1	Day A
19	H03	0.216	0.150779	-0.654212	88_SSC	Patient	18	171	190	Peptid 18 - standard	2.07	3.75	-1.18468	0.05	0.95	0	0.9	1	1	Day A
19	H04	0.45	0.459778	-0.437257	88_SSC	Patient	24	231	250	Peptid 24 - standard	0.505	10.134	3.02459	0	0.15	0.85	0.45	0.8	0.8	Day A
19	H05	0.275	0.228689	-0.596024	88_SSC	Patient	30	291	310	Peptid 30 - standard	-0.43	9.299	1.0755	0.4	0.6	0	0.55	0.75	0.75	Day A
19	H06	0.282	0.237932	-0.589452	88_SSC	Patient	36	351	370	Peptid 36 - standard	-1.26667	4.426	-1.08768	0	0	1	0	0	0	Day A
19	H07	0.133	0.041176	-0.761331	373_SSC	Patient	6	51	70	Peptid 6 - standard	1.495	6.332	-0.090825	0.15	0.85	0	0.8	0.9	0.9	Day A
19	H08	0.164	0.0821119	-0.714259	373_SSC	Patient	12	111	130	Peptid 12 - standard	1.155	6.161	-0.138536	0.75	0.25	0	0	1	1	Day A
19	H09	0.112	0.0134452	-0.811645	373_SSC	Patient	18	171	190	Peptid 18 - standard	2.07	3.75	-1.18468	0.05	0.95	0	0.9	1	1	Day A
19	H10	0.43	0.433368	-0.455387	373_SSC	Patient	24	231	250	Peptid 24 - standard	0.505	10.134	3.02459	0	0.15	0.85	0.45	0.8	0.8	Day A
19	H11	0.141	0.0517401	-0.747572	373_SSC	Patient	30	291	310	Peptid 30 - standard	-0.43	9.299	1.0755	0.4	0.6	0	0.55	0.75	0.75	Day A
19	H12	0.136	0.0451375	-0.755981	373_SSC	Patient	36	351	370	Peptid 36 - standard	-1.26667	4.426	-1.08768	0	0	1	0	0	0	Day A
20	A01	0.048	0.00824801	-0.82752	38/16_NK	NHS	7	61	80	Peptid 7 - alternative	2.035	6.1	-0.0908091	0	1	0	0.95	0.95	0.95	Day B
20	A02	0.055	0.019198	-0.7981	38/16_NK	NHS	7	61	80	Peptid 7 - standard	2.035	6.1	-0.0908091	0	1	0	0.95	0.95	0.95	Day B
20	A03	0.263	0.344568	-0.515847	38/16_NK	NHS	13	121	140	Peptid 13 - standard	1.06	8.523	0.858299	0.25	0.75	0	0.5	0.75	0.75	Day B
20	A04	0.048	0.00824801	-0.82752	38/16_NK	NHS	19	181	200	Peptid 19 - standard	0.31	5.361	-1.7534	0.55	0.45	0	0.4	0.7	0.7	Day B
20	A05	0.067	0.0379693	-0.765862	38/16_NK	NHS	25	241	260	Peptid 25 - standard	0.845	13.102	4.90911	0	0.25	0.75	0.4	0.7	0.7	Day B
20	A06	0.051	0.0129408	-0.812992	38/16_NK	NHS	31	301	320	Peptid 31 - standard	0.845	7.249	-0.0230898	0	1	0	1	0.95	0.95	Day B
20	A07	0.073	0.0473549	-0.753092	410_NK_SSC	NHS	7	61	80	Peptid 7 - alternative	2.035	6.1	-0.0908091	0	1	0	0.95	0.95	0.95	Day B
20	A08	0.078	0.0551763	-0.743407	410_NK_SSC	NHS	7	61	80	Peptid 7 - standard	2.035	6.1	-0.0908091	0	1	0	0.95	0.95	0.95	Day B
20	A09	0.257	0.335182	-0.522236	410_NK_SSC	NHS	13	121	140	Peptid 13 - standard	1.06	8.523	0.858299	0.25	0.75	0	0.5	0.75	0.75	Day B
20	A10	0.08	0.0583049	-0.739724	410_NK_SSC	NHS	19	181	200	Peptid 19 - standard	0.31	5.361	-1.7534	0.55	0.45	0	0.4	0.7	0.7	Day B
20	A11	0.123	0.125569	-0.674786	410_NK_SSC	NHS	25	241	260	Peptid 25 - standard	0.845	13.102	4.90911	0	0.25	0.75	0.4	0.7	0.7	Day B
20	A12	0.091	0.0755119	-0.72094	410_NK_SSC	NHS	31	301	320	Peptid 31 - standard	0.845	7.249	-0.0230898	0	1	0	1	0.95	0.95	Day B
20	B01	0.086	0.0676906	-0.729203	38/16_NK	NHS	NA	NA	NA	Positive Control	NA	6.1	-0.0908091	NA	NA	NA	NA	NA	NA	Day B
20	B02	0.056	0.0207622	-0.794856	38/16_NK	NHS	11	101	120	Peptid 11 - standard	1.625	3.75	-1.08923	0.5	0.5	0	0.45	1	1	Day B
20	B03	0.132	0.139647	-0.663145	38/16_NK	NHS	14	131	150	Peptid 14 - standard	0.895	6.155	-0.140134	0	0.85	0.15	1	0.75	0.75	Day B
20	B04	0.547	0.788823	-0.191732	38/16_NK	NHS	20	191	210	Peptid 20 - standard	-1.13	6.782	-0.637957	1	0	0	0	0.7	0.7	Day B
20	B05	0.053	0.0160694	-0.8051	38/16_NK	NHS	26	251	270	Peptid 26 - standard	1.85	10.526	1.86143	0	0.75	0.25	0.9	0.9	0.9	Day B
20	B06	0.072	0.0457907	-0.755123	38/16_NK	NHS	32	311	330	Peptid 32 - standard	0.5	8.798	1.81212	0	0.55	0.45	0.8	0.7	0.7	Day B
20	B07	0.087	0.0692548	-0.727518	410_NK_SSC	NHS	NA	NA	NA	Positive Control	NA	6.1	-0.0908091	NA	NA	NA	NA	NA	NA	Day B
20	B08	0.088	0.0708191	-0.725849	410_NK_SSC	NHS	11	101	120	Peptid 11 - standard	1.625	3.75	-1.08923	0.5	0.5	0	0.45	1	1	Day B
20	B09	0.124	0.127133	-0.673472	410_NK_SSC	NHS	14	131	150	Peptid 14 - standard	0.895	6.155	-0.140134	0	0.85	0.15	1	0.75	0.75	Day B
20	B10	0.544	0.78413	-0.195612	410_NK_SSC	NHS	20	191	210	Peptid 20 - standard	-1.13	6.782	-0.637957	1	0	0	0	0.7	0.7	Day B
20	B11	0.082	0.0614334	-0.736134	410_NK_SSC	NHS	26	251	270	Peptid 26 - standard	1.85	10.526	1.86143	0	0.75	0.25	0.9	0.9	0.9	Day B
20	B12	0.09	0.0739477	-0.722561	410_NK_SSC	NHS	32	311	330	Peptid 32 - standard	0.5	8.798	1.81212	0	0.55	0.45	0.8	0.7	0.7	Day B
20	C01	0.148	0.164676	-0.643338	38/16_NK	NHS	1	1	20	Peptid 1 - standard	0.715	3.737	-3.91814	1	0	0	0	0.85	0.85	Day B
20	C02	0.047	0.00668373	-0.833557	38/16_NK	NHS	12	111	130	Peptid 12 - alternative	1.155	6.161	-0.138536	0.75	0.25	0	0	1	1	Day B
20	C03	0.049	0.00981229	-0.822194	38/16_NK	NHS	15	141	160	Peptid 15 - alternative	0.75	7.353	0.0262035	0	0.35	0.65	0.65	0.95	0.95	Day B
20	C04	0.087	0.0692548	-0.727518	38/16_NK	NHS	21	201	220	Peptid 21 - standard	-0.2	9.501	2.02619	0.6	0.4	0	0.25	1	1	Day B
20	C05	0.075	0.0504835	-0.749129	38/16_NK	NHS	27	261	280	Peptid 27 - standard	1.92	5.29	-0.972198	0.15	0.85	0	0.85	1	1	Day B
20	C06	0.058	0.0238908	-0.788774	38/16_NK	NHS	33	321	340	Peptid 33 - standard	0.25	11.38	2.86142	0	0.05	0.95	0.3	0.65	0.65	Day B
20	C07	0.094	0.0802048	-0.716165	410_NK_SSC	NHS	1	1	20	Peptid 1 - standard	0.715	3.737	-3.91814	1	0	0	0	0.85	0.85	Day B
20	C08	0.066	0.036405	-0.768145	410_NK_SSC	NHS	12	111	130	Peptid 12 - alternative	1.155	6.161	-0.138536	0.75	0.25	0	0	1	1	Day B
20	C09	0.073	0.0473549	-0.753092	410_NK_SSC	NHS	15	141	160	Peptid 15 - alternative	0.75	7.353	0.0262035	0	0.35	0.65	0.65	0.95	0.95	Day B
20	C10	0.131	0.138083	-0.664418	410_NK_SSC	NHS	21	201	220	Peptid 21 - standard	-0.2	9.501	2.02619	0.6	0.4	0	0.25	1	1	Day B
20	C11	0.096	0.0833333	-0.713048	410_NK_SSC	NHS	27	261	280	Peptid 27 - standard	1.92	5.29	-0.972198	0.15	0.85	0	0.85	1	1	Day B
20	C12	0.086	0.0676906	-0.729203	410_NK_SSC	NHS	33	321	340	Peptid 33 - standard	0.25	11.38	2.86142	0	0.05	0.95	0.3	0.65	0.65	Day B
20	D01	0.159	0.181883	-0.630231	38/16_NK	NHS	2	11	30	Peptid 2 - standard	-0.13	3.295	-4.08764	1	0	0	0	0.65	0.65	Day B
20	D02	0.049	0.00981229	-0.822194	38/16_NK	NHS	8	71	90	Peptid 8 - standard	0.305	10.398	0.910742	0	0.55	0.45	0.6	0.9	0.9	Day B
20	D03	0.047	0.00668373	-0.833557	38/16_NK	NHS	16	151	170	Peptid 16 - alternative	-0.105	12.204	3.0739	0	0.05	0.95	0.35	0.75	0.75	Day B
20	D04	0.103	0.0942833	-0.702509	38/16_NK	NHS	17	161	180	Peptid 17 - alternative	0.62	10.518	2.81369	0	0.55	0.45	0.7	0.8	0.8	Day B
20	D05	0.237	0.303896	-0.543602	38/16_NK	NHS	28	271	290	Peptid 28 - standard	1.21	5.406	-0.970632	0.65	0.35	0	0.35	0.95	0.95	Day B
20	D06	0.058	0.0238908	-0.788774	38/16_NK	NHS	34	331	350	Peptid 34 - standard	-0.485	12.199	2.86142	0	0	1	0	0.45	0.45	Day B
20	D07	0.1	0.0895904	-0.70696	410_NK_SSC	NHS	2	11	30	Peptid 2 - standard	-0.13	3.295	-4.08764	1	0	0	0	0.65	0.65	Day B
20	D08	0.077	0.0536121	-0.745287	410_NK_SSC	NHS	8	71	90	Peptid 8 - standard	0.305	10.398	0.910742	0	0.55	0.45	0.6	0.9	0.9	Day B
20	D09	0.074	0.0489192	-0.751094	410_NK_SSC	NHS	16	151	170	Peptid 16 - alternative	-0.105	12.204	3.0739	0	0.05	0.95	0.35	0.75	0.75	Day B
20	D10	0.14	0.152162	-0.653117	410_NK_SSC	NHS	17	161	180	Peptid 17 - alternative	0.62	10.518	2.81369	0	0.55	0.45	0.7	0.8	0.8	Day B
20	D11	0.191	0.23194	-0.593707	410_NK_SSC	NHS	28	271	290	Peptid 28 - standard	1.21	5.406	-0.970632	0.65	0.35	0	0.35	0.95	0.95	Day B
20	D12	0.088	0.0708191	-0.725849	410_NK_SSC	NHS	34	331	350	Peptid 34 - standard	-0.485	12.199	2.86142	0	0	1	0	0.45	0.45	Day B
20	E01	0.098	0.0864619	-0.709981	38/16_NK	NHS	3	21	40	Peptid 3 - standard	-1.26	3.226	-5.18152	1	0	0	0	0.45	0.45	Day B
20	E02	0.048	0.00824801	-0.82752	38/16_NK	NHS	9	81	100	Peptid 9 - standard	0.2	7.552	0.0786615	0	0.55	0.45	0.65	0.9	0.9	Day B
20	E03	0.054	0.0176337	-0.801506	38/16_NK	NHS	15	141	160	Peptid 15 - standard	0.75	7.353	0.0262035	0	0.35	0.65	0.65	0.95	0.95	Day B
20	E04	0.155	0.175626	-0.634957	38/16_NK	NHS	23	221	240	Peptid 23 - alternative	1.925	7.352	0.0246369	0	0.65	0.35	0.95	1	1	Day B
20	E05	0.049	0.00981229	-0.822194	38/16_NK	NHS	24	231	250	Peptid 24 - alternative	0.505	10.134	3.02459	0	0.15	0.85	0.45	0.8	0.8	Day B
20	E06	0.05	0.0113766	-0.817392	38/16_NK	NHS	35	341	360	Peptid 35 - standard	-2.005	12.023	1.91229	0	0	1	0	0	0	Day B
20	E07	0.179	0.213168	-0.607177	410_NK_SSC	NHS	3	21	40	Peptid 3 - standard	-1.26	3.226	-5.18152	1	0	0	0	0.45	0.45	Day B
20	E08	0.075	0.0504835	-0.749129	410_NK_SSC	NHS	9	81	100	Peptid 9 - standard	0.2	7.552	0.0786615	0	0.55	0.45	0.65	0.9	0.9	Day B
20	E09	0.089	0.0723834	-0.724197	410_NK_SSC	NHS	15	141	160	Peptid 15 - standard	0.75	7.353	0.0262035	0	0.35	0.65	0.65	0.95	0.95	Day B
20	E10	0.23	0.292947	-0.55112	410_NK_SSC	NHS	23	221	240	Peptid 23 - alternative	1.925	7.352	0.0246369	0	0.65	0.35	0.95	1	1	Day B
20	E11	0.074	0.0489192	-0.751094	410_NK_SSC	NHS	24	231	250	Peptid 24 - alternative	0.505	10.134	3.02459	0	0.15	0.85	0.45	0.8	0.8	Day B
20	E12	0.084	0.064562	-0.73263	410_NK_SSC	NHS	35	341	360	Peptid 35 - standard	-2.005	12.023	1.91229	0	0	1	0	0	0	Day B
20	F01	0.593	0.860779	-0.130372	38/16_NK	NHS	4	31	50	Peptid 4 - standard	-0.955	3.295	-4.22766	1	0	0	0	0.7	0.7	Day B
20	F02	0.084	0.064562	-0.73263	38/16_NK	NHS	10	91	110	Peptid 10 - standard	1.82	5.292	-0.922889	0	1	0	0.95	1	1	Day B
20	F03	0.086	0.0676906	-0.729203	38/16_NK	NHS	16	151	170	Peptid 16 - standard	-0.105	12.204	3.0739	0	0.05	0.95	0.35	0.75	0.75	Day B
20	F04	0.051	0.0129408	-0.812992	38/16_NK	NHS	22	211	230	Peptid 22 - standard	1.5	12.5	1.90916	0.1	0.9	0	0.75	1	1	Day B
20	F05	0.052	0.0145051	-0.808914	38/16_NK	NHS	26	251	270	Peptid 26 - alternative	1.85	10.526	1.86143	0	0.75	0.25	0.9	0.9	0.9	Day B
20	F06	0.048	0.00824801	-0.82752	38/16_NK	NHS	NK	NA	NA	Negative Control	NA	6.1	-0.0908091	NA	NA	NA	NA	NA	NA	Day B
20	F07	0.62	0.903015	-0.0925724	410_NK_SSC	NHS	4	31	50	Peptid 4 - standard	-0.955	3.295	-4.22766	1	0	0	0	0.7	0.7	Day B
20	F08	0.096	0.0833333	-0.713048	410_NK_SSC	NHS	10	91	110	Peptid 10 - standard	1.82	5.292	-0.922889	0	1	0	0.95	1	1	Day B
20	F09	0.12	0.120876	-0.678765	410_NK_SSC	NHS	16	151	170	Peptid 16 - standard	-0.105	12.204	3.0739	0	0.05	0.95	0.35	0.75	0.75	Day B
20	F10	0.081	0.0598692	-0.737918	410_NK_SSC	NHS	22	211	230	Peptid 22 - standard	1.5	12.5	1.90916	0.1	0.9	0	0.75	1	1	Day B
20	F11	0.115	0.113055	-0.685523	410_NK_SSC	NHS	26	251	270	Peptid 26 - alternative	1.85	10.526	1.86143	0	0.75	0.25	0.9	0.9	0.9	Day B
20	F12	0.071	0.0442264	-0.757189	410_NK_SSC	NHS	NK	NA	NA	Negative Control	NA	6.1	-0.0908091	NA	NA	NA	NA	NA	NA	Day B
20	G01	0.125	0.128697	-0.672162	38/16_NK	NHS	5	41	60	Peptid 5 - standard	-0.055	4.109	-1.13697	0.65	0.35	0	0.3	0.85	0.85	Day B
20	G02	0.082	0.0614334	-0.736134	38/16_NK	NHS	11	101	120	Peptid 11 - standard	1.625	3.75	-1.08923	0.5	0.5	0	0.45	1	1	Day B
20	G03	0.077	0.0536121	-0.745287	38/16_NK	NHS	17	161	180	Peptid 17 - standard	0.62	10.518	2.81369	0	0.55	0.45	0.7	0.8	0.8	Day B
20	G04	0.059	0.0254551	-0.785906	38/16_NK	NHS	23	221	240	Peptid 23 - standard	1.925	7.352	0.0246369	0	0.65	0.35	0.95	1	1	Day B
20	G05	0.053	0.0160694	-0.8051	38/16_NK	NHS	29	281	300	Peptid 29 - standard	-0.36	8.545	0.864581	0.9	0.1	0	0.05	0.75	0.75	Day B
20	G06	0.164	0.189704	-0.624383	38/16_NK	NHS	31	301	320	Peptid 31 - alternative	0.845	7.249	-0.0230898	0	1	0	1	0.95	0.95	Day B
20	G07	0.123	0.125569	-0.674786	410_NK_SSC	NHS	5	41	60	Peptid 5 - standard	-0.055	4.109	-1.13697	0.65	0.35	0	0.3	0.85	0.85	Day B
20	G08	0.083	0.0629977	-0.734372	410_NK_SSC	NHS	11	101	120	Peptid 11 - standard	1.625	3.75	-1.08923	0.5	0.5	0	0.45	1	1	Day B
20	G09	0.124	0.127133	-0.673472	410_NK_SSC	NHS	17	161	180	Peptid 17 - standard	0.62	10.518	2.81369	0	0.55	0.45	0.7	0.8	0.8	Day B
20	G10	0.086	0.0676906	-0.729203	410_NK_SSC	NHS	23	221	240	Peptid 23 - standard	1.925	7.352	0.0246369	0	0.65	0.35	0.95	1	1	Day B
20	G11	0.073	0.0473549	-0.753092	410_NK_SSC	NHS	29	281	300	Peptid 29 - standard	-0.36	8.545	0.864581	0.9	0.1	0	0.05	0.75	0.75	Day B
20	G12	0.222	0.280432	-0.559747	410_NK_SSC	NHS	31	301	320	Peptid 31 - alternative	0.845	7.249	-0.0230898	0	1	0	1	0.95	0.95	Day B
20	H01	0.183	0.219425	-0.602661	38/16_NK	NHS	6	51	70	Peptid 6 - standard	1.495	6.332	-0.090825	0.15	0.85	0	0.8	0.9	0.9	Day B
20	H02	0.123	0.125569	-0.674786	38/16_NK	NHS	12	111	130	Peptid 12 - standard	1.155	6.161	-0.138536	0.75	0.25	0	0	1	1	Day B
20	H03	0.057	0.0223265	-0.791753	38/16_NK	NHS	18	171	190	Peptid 18 - standard	2.07	3.75	-1.18468	0.05	0.95	0	0.9	1	1	Day B
20	H04	0.053	0.0160694	-0.8051	38/16_NK	NHS	24	231	250	Peptid 24 - standard	0.505	10.134	3.02459	0	0.15	0.85	0.45	0.8	0.8	Day B
20	H05	0.059	0.0254551	-0.785906	38/16_NK	NHS	30	291	310	Peptid 30 - standard	-0.43	9.299	1.0755	0.4	0.6	0	0.55	0.75	0.75	Day B
20	H06	0.053	0.0160694	-0.8051	38/16_NK	NHS	36	351	370	Peptid 36 - standard	-1.26667	4.426	-1.08768	0	0	1	0	0	0	Day B
20	H07	0.105	0.0974118	-0.699592	410_NK_SSC	NHS	6	51	70	Peptid 6 - standard	1.495	6.332	-0.090825	0.15	0.85	0	0.8	0.9	0.9	Day B
20	H08	0.112	0.108362	-0.689661	410_NK_SSC	NHS	12	111	130	Peptid 12 - standard	1.155	6.161	-0.138536	0.75	0.25	0	0	1	1	Day B
20	H09	0.084	0.064562	-0.73263	410_NK_SSC	NHS	18	171	190	Peptid 18 - standard	2.07	3.75	-1.18468	0.05	0.95	0	0.9	1	1	Day B
20	H10	0.075	0.0504835	-0.749129	410_NK_SSC	NHS	24	231	250	Peptid 24 - standard	0.505	10.134	3.02459	0	0.15	0.85	0.45	0.8	0.8	Day B
20	H11	0.078	0.0551763	-0.743407	410_NK_SSC	NHS	30	291	310	Peptid 30 - standard	-0.43	9.299	1.0755	0.4	0.6	0	0.55	0.75	0.75	Day B
20	H12	0.081	0.0598692	-0.737918	410_NK_SSC	NHS	36	351	370	Peptid 36 - standard	-1.26667	4.426	-1.08768	0	0	1	0	0	0	Day B
21	A01	0.103	0.12952	-0.671476	383_SSC	Patient	7	61	80	Peptid 7 - alternative	2.035	6.1	-0.0908091	0	1	0	0.95	0.95	0.95	Day A
21	A02	0.09	0.102403	-0.695014	383_SSC	Patient	7	61	80	Peptid 7 - standard	2.035	6.1	-0.0908091	0	1	0	0.95	0.95	0.95	Day A
21	A03	0.08	0.0815429	-0.714826	383_SSC	Patient	13	121	140	Peptid 13 - standard	1.06	8.523	0.858299	0.25	0.75	0	0.5	0.75	0.75	Day A
21	A04	0.164	0.256765	-0.576198	383_SSC	Patient	19	181	200	Peptid 19 - standard	0.31	5.361	-1.7534	0.55	0.45	0	0.4	0.7	0.7	Day A
21	A05	0.106	0.135778	-0.666303	383_SSC	Patient	25	241	260	Peptid 25 - standard	0.845	13.102	4.90911	0	0.25	0.75	0.4	0.7	0.7	Day A
21	A06	0.128	0.18167	-0.630391	383_SSC	Patient	31	301	320	Peptid 31 - standard	0.845	7.249	-0.0230898	0	1	0	1	0.95	0.95	Day A
21	A07	0.095	0.112833	-0.685717	410_NK_SSC	NHS	7	61	80	Peptid 7 - alternative	2.035	6.1	-0.0908091	0	1	0	0.95	0.95	0.95	Day A
21	A08	0.072	0.064855	-0.732305	410_NK_SSC	NHS	7	61	80	Peptid 7 - standard	2.035	6.1	-0.0908091	0	1	0	0.95	0.95	0.95	Day A
21	A09	0.063	0.0460812	-0.754743	410_NK_SSC	NHS	13	121	140	Peptid 13 - standard	1.06	8.523	0.858299	0.25	0.75	0	0.5	0.75	0.75	Day A
21	A10	0.15	0.227561	-0.596829	410_NK_SSC	NHS	19	181	200	Peptid 19 - standard	0.31	5.361	-1.7534	0.55	0.45	0	0.4	0.7	0.7	Day A
21	A11	0.162	0.252593	-0.57912	410_NK_SSC	NHS	25	241	260	Peptid 25 - standard	0.845	13.102	4.90911	0	0.25	0.75	0.4	0.7	0.7	Day A
21	A12	0.085	0.0919728	-0.704689	410_NK_SSC	NHS	31	301	320	Peptid 31 - standard	0.845	7.249	-0.0230898	0	1	0	1	0.95	0.95	Day A
21	B01	0.473	0.901333	-0.0941047	383_SSC	Patient	NA	NA	NA	Positive Control	NA	6.1	-0.0908091	NA	NA	NA	NA	NA	NA	Day A
21	B02	0.166	0.260937	-0.573283	383_SSC	Patient	11	101	120	Peptid 11 - standard	1.625	3.75	-1.08923	0.5	0.5	0	0.45	1	1	Day A
21	B03	0.096	0.114919	-0.683898	383_SSC	Patient	14	131	150	Peptid 14 - standard	0.895	6.155	-0.140134	0	0.85	0.15	1	0.75	0.75	Day A
21	B04	0.14	0.206702	-0.611873	383_SSC	Patient	20	191	210	Peptid 20 - standard	-1.13	6.782	-0.637957	1	0	0	0	0.7	0.7	Day A
21	B05	0.143	0.21296	-0.607328	383_SSC	Patient	26	251	270	Peptid 26 - standard	1.85	10.526	1.86143	0	0.75	0.25	0.9	0.9	0.9	Day A
21	B06	0.086	0.0940587	-0.70272	383_SSC	Patient	32	311	330	Peptid 32 - standard	0.5	8.798	1.81212	0	0.55	0.45	0.8	0.7	0.7	Day A
21	B07	0.46	0.874215	-0.118499	410_NK_SSC	NHS	NA	NA	NA	Positive Control	NA	6.1	-0.0908091	NA	NA	NA	NA	NA	NA	Day A
21	B08	0.114	0.152466	-0.652876	410_NK_SSC	NHS	11	101	120	Peptid 11 - standard	1.625	3.75	-1.08923	0.5	0.5	0	0.45	1	1	Day A
21	B09	0.077	0.0752849	-0.721175	410_NK_SSC	NHS	14	131	150	Peptid 14 - standard	0.895	6.155	-0.140134	0	0.85	0.15	1	0.75	0.75	Day A
21	B10	0.127	0.179584	-0.631962	410_NK_SSC	NHS	20	191	210	Peptid 20 - standard	-1.13	6.782	-0.637957	1	0	0	0	0.7	0.7	Day A
21	B11	0.125	0.175412	-0.635119	410_NK_SSC	NHS	26	251	270	Peptid 26 - standard	1.85	10.526	1.86143	0	0.75	0.25	0.9	0.9	0.9	Day A
21	B12	0.132	0.190014	-0.624153	410_NK_SSC	NHS	32	311	330	Peptid 32 - standard	0.5	8.798	1.81212	0	0.55	0.45	0.8	0.7	0.7	Day A
21	C01	0.126	0.177498	-0.633538	383_SSC	Patient	1	1	20	Peptid 1 - standard	0.715	3.737	-3.91814	1	0	0	0	0.85	0.85	Day A
21	C02	0.128	0.18167	-0.630391	383_SSC	Patient	12	111	130	Peptid 12 - alternative	1.155	6.161	-0.138536	0.75	0.25	0	0	1	1	Day A
21	C03	0.19	0.311001	-0.538737	383_SSC	Patient	15	141	160	Peptid 15 - alternative	0.75	7.353	0.0262035	0	0.35	0.65	0.65	0.95	0.95	Day A
21	C04	0.171	0.271367	-0.566025	383_SSC	Patient	21	201	220	Peptid 21 - standard	-0.2	9.501	2.02619	0.6	0.4	0	0.25	1	1	Day A
21	C05	0.123	0.17124	-0.638296	383_SSC	Patient	27	261	280	Peptid 27 - standard	1.92	5.29	-0.972198	0.15	0.85	0	0.85	1	1	Day A
21	C06	0.232	0.398612	-0.479103	383_SSC	Patient	33	321	340	Peptid 33 - standard	0.25	11.38	2.86142	0	0.05	0.95	0.3	0.65	0.65	Day A
21	C07	0.147	0.221304	-0.601311	410_NK_SSC	NHS	1	1	20	Peptid 1 - standard	0.715	3.737	-3.91814	1	0	0	0	0.85	0.85	Day A
21	C08	0.127	0.179584	-0.631962	410_NK_SSC	NHS	12	111	130	Peptid 12 - alternative	1.155	6.161	-0.138536	0.75	0.25	0	0	1	1	Day A
21	C09	0.153	0.233819	-0.59237	410_NK_SSC	NHS	15	141	160	Peptid 15 - alternative	0.75	7.353	0.0262035	0	0.35	0.65	0.65	0.95	0.95	Day A
21	C10	0.225	0.38401	-0.489036	410_NK_SSC	NHS	21	201	220	Peptid 21 - standard	-0.2	9.501	2.02619	0.6	0.4	0	0.25	1	1	Day A
21	C11	0.101	0.125348	-0.674972	410_NK_SSC	NHS	27	261	280	Peptid 27 - standard	1.92	5.29	-0.972198	0.15	0.85	0	0.85	1	1	Day A
21	C12	0.224	0.381924	-0.490455	410_NK_SSC	NHS	33	321	340	Peptid 33 - standard	0.25	11.38	2.86142	0	0.05	0.95	0.3	0.65	0.65	Day A
21	D01	0.14	0.206702	-0.611873	383_SSC	Patient	2	11	30	Peptid 2 - standard	-0.13	3.295	-4.08764	1	0	0	0	0.65	0.65	Day A
21	D02	0.101	0.125348	-0.674972	383_SSC	Patient	8	71	90	Peptid 8 - standard	0.305	10.398	0.910742	0	0.55	0.45	0.6	0.9	0.9	Day A
21	D03	0.15	0.227561	-0.596829	383_SSC	Patient	16	151	170	Peptid 16 - alternative	-0.105	12.204	3.0739	0	0.05	0.95	0.35	0.75	0.75	Day A
21	D04	0.138	0.20253	-0.614921	383_SSC	Patient	17	161	180	Peptid 17 - alternative	0.62	10.518	2.81369	0	0.55	0.45	0.7	0.8	0.8	Day A
21	D05	0.065	0.0502532	-0.749416	383_SSC	Patient	28	271	290	Peptid 28 - standard	1.21	5.406	-0.970632	0.65	0.35	0	0.35	0.95	0.95	Day A
21	D06	0.462	0.878387	-0.114784	383_SSC	Patient	34	331	350	Peptid 34 - standard	-0.485	12.199	2.86142	0	0	1	0	0.45	0.45	Day A
21	D07	0.143	0.21296	-0.607328	410_NK_SSC	NHS	2	11	30	Peptid 2 - standard	-0.13	3.295	-4.08764	1	0	0	0	0.65	0.65	Day A
21	D08	0.073	0.066941	-0.730017	410_NK_SSC	NHS	8	71	90	Peptid 8 - standard	0.305	10.398	0.910742	0	0.55	0.45	0.6	0.9	0.9	Day A
21	D09	0.158	0.244249	-0.584987	410_NK_SSC	NHS	16	151	170	Peptid 16 - alternative	-0.105	12.204	3.0739	0	0.05	0.95	0.35	0.75	0.75	Day A
21	D10	0.182	0.294313	-0.55018	410_NK_SSC	NHS	17	161	180	Peptid 17 - alternative	0.62	10.518	2.81369	0	0.55	0.45	0.7	0.8	0.8	Day A
21	D11	0.066	0.0523391	-0.746836	410_NK_SSC	NHS	28	271	290	Peptid 28 - standard	1.21	5.406	-0.970632	0.65	0.35	0	0.35	0.95	0.95	Day A
21	D12	0.456	0.865871	-0.125888	410_NK_SSC	NHS	34	331	350	Peptid 34 - standard	-0.485	12.199	2.86142	0	0	1	0	0.45	0.45	Day A
21	E01	0.154	0.235905	-0.590889	383_SSC	Patient	3	21	40	Peptid 3 - standard	-1.26	3.226	-5.18152	1	0	0	0	0.45	0.45	Day A
21	E02	0.127	0.179584	-0.631962	383_SSC	Patient	9	81	100	Peptid 9 - standard	0.2	7.552	0.0786615	0	0.55	0.45	0.65	0.9	0.9	Day A
21	E03	0.189	0.308915	-0.540164	383_SSC	Patient	15	141	160	Peptid 15 - standard	0.75	7.353	0.0262035	0	0.35	0.65	0.65	0.95	0.95	Day A
21	E04	0.115	0.154552	-0.651231	383_SSC	Patient	23	221	240	Peptid 23 - alternative	1.925	7.352	0.0246369	0	0.65	0.35	0.95	1	1	Day A
21	E05	0.088	0.0982307	-0.698835	383_SSC	Patient	24	231	250	Peptid 24 - alternative	0.505	10.134	3.02459	0	0.15	0.85	0.45	0.8	0.8	Day A
21	E06	0.114	0.152466	-0.652876	383_SSC	Patient	35	341	360	Peptid 35 - standard	-2.005	12.023	1.91229	0	0	1	0	0	0	Day A
21	E07	0.133	0.1921	-0.622605	410_NK_SSC	NHS	3	21	40	Peptid 3 - standard	-1.26	3.226	-5.18152	1	0	0	0	0.45	0.45	Day A
21	E08	0.096	0.114919	-0.683898	410_NK_SSC	NHS	9	81	100	Peptid 9 - standard	0.2	7.552	0.0786615	0	0.55	0.45	0.65	0.9	0.9	Day A
21	E09	0.139	0.204616	-0.613395	410_NK_SSC	NHS	15	141	160	Peptid 15 - standard	0.75	7.353	0.0262035	0	0.35	0.65	0.65	0.95	0.95	Day A
21	E10	0.136	0.198358	-0.617983	410_NK_SSC	NHS	23	221	240	Peptid 23 - alternative	1.925	7.352	0.0246369	0	0.65	0.35	0.95	1	1	Day A
21	E11	0.127	0.179584	-0.631962	410_NK_SSC	NHS	24	231	250	Peptid 24 - alternative	0.505	10.134	3.02459	0	0.15	0.85	0.45	0.8	0.8	Day A
21	E12	0.104	0.131606	-0.669742	410_NK_SSC	NHS	35	341	360	Peptid 35 - standard	-2.005	12.023	1.91229	0	0	1	0	0	0	Day A
21	F01	0.098	0.119091	-0.680294	383_SSC	Patient	4	31	50	Peptid 4 - standard	-0.955	3.295	-4.22766	1	0	0	0	0.7	0.7	Day A
21	F02	0.102	0.127434	-0.673219	383_SSC	Patient	10	91	110	Peptid 10 - standard	1.82	5.292	-0.922889	0	1	0	0.95	1	1	Day A
21	F03	0.118	0.16081	-0.646335	383_SSC	Patient	16	151	170	Peptid 16 - standard	-0.105	12.204	3.0739	0	0.05	0.95	0.35	0.75	0.75	Day A
21	F04	0.136	0.198358	-0.617983	383_SSC	Patient	22	211	230	Peptid 22 - standard	1.5	12.5	1.90916	0.1	0.9	0	0.75	1	1	Day A
21	F05	0.125	0.175412	-0.635119	383_SSC	Patient	26	251	270	Peptid 26 - alternative	1.85	10.526	1.86143	0	0.75	0.25	0.9	0.9	0.9	Day A
21	F06	0.045	0.00853356	-0.826502	383_SSC	Patient	NK	NA	NA	Negative Control	NA	6.1	-0.0908091	NA	NA	NA	NA	NA	NA	Day A
21	F07	0.079	0.0794569	-0.716918	410_NK_SSC	NHS	4	31	50	Peptid 4 - standard	-0.955	3.295	-4.22766	1	0	0	0	0.7	0.7	Day A
21	F08	0.066	0.0523391	-0.746836	410_NK_SSC	NHS	10	91	110	Peptid 10 - standard	1.82	5.292	-0.922889	0	1	0	0.95	1	1	Day A
21	F09	0.098	0.119091	-0.680294	410_NK_SSC	NHS	16	151	170	Peptid 16 - standard	-0.105	12.204	3.0739	0	0.05	0.95	0.35	0.75	0.75	Day A
21	F10	0.148	0.22339	-0.599814	410_NK_SSC	NHS	22	211	230	Peptid 22 - standard	1.5	12.5	1.90916	0.1	0.9	0	0.75	1	1	Day A
21	F11	0.095	0.112833	-0.685717	410_NK_SSC	NHS	26	251	270	Peptid 26 - alternative	1.85	10.526	1.86143	0	0.75	0.25	0.9	0.9	0.9	Day A
21	F12	0.054	0.0273074	-0.782637	410_NK_SSC	NHS	NK	NA	NA	Negative Control	NA	6.1	-0.0908091	NA	NA	NA	NA	NA	NA	Day A
21	G01	0.147	0.221304	-0.601311	383_SSC	Patient	5	41	60	Peptid 5 - standard	-0.055	4.109	-1.13697	0.65	0.35	0	0.3	0.85	0.85	Day A
21	G02	0.127	0.179584	-0.631962	383_SSC	Patient	11	101	120	Peptid 11 - standard	1.625	3.75	-1.08923	0.5	0.5	0	0.45	1	1	Day A
21	G03	0.28	0.498739	-0.410263	383_SSC	Patient	17	161	180	Peptid 17 - standard	0.62	10.518	2.81369	0	0.55	0.45	0.7	0.8	0.8	Day A
21	G04	0.147	0.221304	-0.601311	383_SSC	Patient	23	221	240	Peptid 23 - standard	1.925	7.352	0.0246369	0	0.65	0.35	0.95	1	1	Day A
21	G05	0.131	0.187928	-0.625706	383_SSC	Patient	29	281	300	Peptid 29 - standard	-0.36	8.545	0.864581	0.9	0.1	0	0.05	0.75	0.75	Day A
21	G06	0.088	0.0982307	-0.698835	383_SSC	Patient	31	301	320	Peptid 31 - alternative	0.845	7.249	-0.0230898	0	1	0	1	0.95	0.95	Day A
21	G07	0.126	0.177498	-0.633538	410_NK_SSC	NHS	5	41	60	Peptid 5 - standard	-0.055	4.109	-1.13697	0.65	0.35	0	0.3	0.85	0.85	Day A
[truncated: 1,553 more rows]
